# Supplementary material for: Nonlinear receptive fields evoke redundant retinal coding of natural scenes
Source: Nature. 2024 Nov 20;637(8045):394–401. doi: 10.1038/s41586-024-08212-3 (PMC11711096; doi:10.1038/s41586-024-08212-3)
Supplement: Supplementary file 3 — Source Data Figs. 1–5 [file 41586_2024_8212_MOESM3_ESM.xlsx]

## Sheet: Fig1
Correlation values and receptive-field distances (µm) for cell pairs (panels e-f)
ON parasol		OFF parasol		ON midget		OFF midget		ON vs OFF parasol		ON vs OFF midget
distance	correlation	distance	correlation	distance	correlation	distance	correlation	distance	correlation	distance	correlation
246.443	0.423097	271.087	0.365393	133.506	0.35988	237.313	0.176526	212.67	0.106737	262.526	-0.0469948
209.185	0.471499	193.918	0.172397	180.878	0.430034	339.236	0.0195811	66.1719	-0.130238	158.478	-0.27874
297.797	0.248765	246.002	0.338258	124.684	0.552413	389.841	-0.173636	365.292	0.104601	80.1883	-0.142853
651.264	0.30995	292.82	0.108198	84.4415	0.613064	197.506	0.0891095	433.751	0.348417	144.286	0.147448
475.164	0.419085	406.242	-0.0799006	324.244	0.120516	621.168	0.0898721	353.985	0.2006	148.95	-0.206455
535.506	0.544772	197.013	-0.018874	288.809	0.284482	597.044	0.0610117	251.172	-0.0483495	358.715	0.0709512
418.356	0.237248	338.199	0.0181125	258.641	0.221326	556.514	-0.0249834	193.96	-0.15983	352.641	0.00185943
678.866	0.380935	269.549	0.277925	440.061	-0.0805408	326.595	0.189647	466.983	0.319185	409.459	-0.0256356
630.311	0.302153	486.794	0.303265	389.422	0.172029	563.612	-0.0924958	466.618	0.199748	267.063	-0.0343838
771.576	0.140253	515.573	0.125288	391.181	0.115581	571.155	0.0518606	699.308	-0.0567896	367.777	-0.00446427
455.391	0.231013	431.025	0.149254	442.119	0.316207	817.594	0.0379922	707.547	0.17194	312.641	-0.0726663
341.952	0.197898	477.002	0.0515548	350.165	0.242461	679.329	0.0949306	104.333	0.245062	565.709	-0.0377377
556.782	0.286905	362.741	0.000254095	444.801	-0.0350013	670.483	-0.140532	312.22	0.0746467	421.989	0.322978
284.693	0.502955	259.616	0.128649	383.204	0.0157526	443.588	0.0592771	118.851	0.0141779	487.443	0.044779
300.01	0.579106	255.172	0.142079	517.172	-0.127383	695.087	-0.0476907	314.106	0.234176	300.772	-0.0956879
323.12	0.314239	490.026	-0.0954356	564.783	0.522983	948.777	0.0505718	397.02	0.126259	550.255	-0.237155
482.888	0.468359	512.907	0.148636	819.588	-0.00600159	1013.74	-0.0546222	373.177	-0.0800393	788.976	-0.227221
478.733	0.338136	755.203	0.1734	514.153	0.146091	742.78	0.0801101	134.28	-0.248342	779.584	0.0602975
640.02	0.312227	748.853	-0.0489601	570.135	0.165704	929.179	0.215281	431.748	0.191526	617.651	-0.278008
390	0.371429	313.792	0.229698	344.301	-0.00902581	864.994	-0.00911486	325.477	0.174153	803.101	-0.0969144
775.403	0.203904	464.87	0.0379266	591.206	0.153188	846.061	-0.111606	491.859	0.0317098	675.33	-0.0897325
661.367	0.262197	468.811	0.225286	810.259	0.193868	889.742	-0.00436163	566.392	0.154768	631.085	-0.0797046
738.546	0.288394	228.377	0.35565	682.162	0.0837139	1006.71	0.0316929	408.776	-0.00651467	644.094	0.0107855
566.844	0.301619	462.505	0.138769	777.076	0.366507	211.175	0.214338	143.178	-0.11955	824.456	-0.175262
860	0.310622	308.179	0.178234	772.135	-0.00269842	926.789	-0.168443	574.181	0.0857691	63.2851	-0.386999
789.526	0.349599	407.065	0.156881	201.122	0.105129	223.416	-0.0849431	592.268	0.191989	702.101	0.101906
912.103	0.0950145	526.051	0.0993567	231.544	0.0288276	293.609	-0.339848	428.581	0.143607	395.361	0.0669059
385.811	0.354562	250.425	0.113263	170.165	0.0472333	253.833	0.115455	317.035	0.0490178	258.094	0.0602409
356.45	0.413105	651.272	0.0147265	191.79	-0.0240073	456.577	0.0228088	390.208	0.0213794	57.7184	-0.103452
488.109	0.284856	437.443	0.0270531	298.8	0.0181223	383.473	0.0573029	573.171	0.33642	67.3146	-0.117561
203.132	0.659059	167.126	0.217512	219.16	0.163105	322.49	0.231422	631.889	0.00298953	250.312	-0.0299356
522.015	0.381127	45.2849	0.596518	313.738	0.00346202	118.294	0.454333	886.02	-0.000839114	226.108	0.306558
420.914	0.431345	319.863	0.312903	397.555	0.0159713	327.653	-0.214349	856.902	0.209447	255.523	-0.0677876
526.1	0.293053	273.975	0.225179	328.824	0.103111	381.78	0.0956064	237.641	0.0531634	401.513	-0.0126442
324.085	0.439175	605.048	0.125629	413.287	0.127524	606.263	0.147175	311.448	0.0248837	338.534	0.102418
460.109	0.312488	466.483	0.0307803	317.805	0.114104	481.663	-0.00724924	416.575	0.0934684	324.933	-0.0128202
240.442	0.415254	151.678	0.353613	331.126	-0.0023452	433.187	-0.15299	239.544	0.246073	193.536	-0.0474309
306.349	0.354841	295.215	0.0646281	285.843	0.0239702	207.966	0.323537	59.4243	-0.0351713	450.63	-0.0548381
162.327	0.554856	567.979	0.211771	397.319	-0.0614395	463.64	0.363947	548.313	0.0999959	301.86	0.24401
151.017	0.634145	460.245	0.161852	530.477	0.424633	715.681	0.117512	407.324	0.0758654	443.296	-0.0182558
152.746	0.648902	241.855	0.429012	731.031	0.063827	784.594	0.0827326	183.371	0.174913	314.663	0.0164008
177.57	0.499119	711.394	0.142715	425	0.14787	518.23	0.329671	284.712	0.010358	530.118	-0.144763
204.466	0.70385	675.676	0.0252383	472.976	0.181084	706.28	0.286765	559.179	0.0123333	746.534	-0.0230515
203.84	0.583218	864.888	0.200545	229.265	0.0874172	627.714	0.0403982	476.898	0.120114	679.414	0.0474369
369.087	0.284158	921.745	0.052625	582.049	0.120878	611.192	-0.18767	484.444	0.138807	606.177	-0.195255
327.815	0.326162	533.444	0.069436	792.48	0.023186	670.005	0.0557687	682.825	0.0781445	782.308	0.140595
235.053	0.524171	454.059	0.074465	600.76	0.115913	770.097	0.125676	545.492	0.152465	615.193	0.008425
314.075	0.41994	623.904	0.14117	717.726	0.0344087	109.659	0.655693	242.706	0.383283	551.64	-0.107099
470.538	0.156461	697.805	0.0993972	696.298	-0.0711222	694.19	-0.175586	356.45	0.069532	534.842	0.0525668
319.394	0.38837	201.563	0.0834055	298.35	0.342928	70.3077	0.379878	884.12	0.0314348	765.057	0.128933
223.377	0.603614	451.504	0.0465519	107.616	0.41554	194.26	0.0947267	678.979	-0.0490551	192.905	-0.0630995
353.315	0.315654	312.26	0.295695	320.007	0.0758828	283.288	-0.0457942	205	0.0373718	611.956	-0.00888348
146.12	0.533576	274.59	0.337186	108.657	0.681166	304.291	0.156974	237.636	0.220662	364.345	0.126076
257.937	0.247107	246.071	0.103618	108.195	0.41479	416.465	-0.0434902	355.537	0.0164357	134.397	-0.385799
165.26	0.392511	240.26	0.0556725	389.752	-0.000315666	318.109	-0.240475	137.5	-0.0504887	198.116	0.0263067
273.884	0.324733	135.021	0.401395	210.238	0.488733	353.234	0.443261	263.331	0.110553	260.012	0.160741
171.646	0.473004	344.903	0.0770677	239.426	0.162773	249.17	0.127916	530.289	0.0486237	323.468	-0.0707438
219.559	0.197323	166.438	0.368495	265.012	0.475254	506.013	0.000796914	233.081	0.134253	350.321	-0.0162648
214.971	0.67865	173.364	0.182476	178.466	0.453915	358.182	-0.157263	138.067	0.283362	251.582	0.030071
267.917	0.287033	76.4236	0.45826	360.067	0.0623263	473.56	0.320958	379.111	0.203827	228.61	-0.171194
87.0427	0.46192	391.082	0.123082	277.004	0.0364932	318.79	-0.0808182	654.714	0.0652004	151.635	-0.139704
105.741	0.594197	352.667	-0.00277376	440.014	0.0103478	551.391	-0.0421643	418.935	-0.00912309	201.634	0.085229
337.083	0.219046	207.084	0.0802835	387.532	0.273899	777.756	0.0868269	304.107	0.268894	263.308	-0.0460268
344.039	0.359182	705.986	0.2457	675.301	0.00712764	730.959	-0.142051	104.616	0.0664889	473.542	-0.0316585
475.243	0.359183	533.197	0.266456	382.001	0.143027	624.391	-0.0530428	225	-0.0801597	355.285	0.0799339
710.948	0.334857	743.846	0.176465	445.568	0.123678	805.091	-0.100429	293.002	0.105803	316.03	0.104305
627.609	0.287076	218.751	0.332907	278.321	-0.00778401	652.693	0.216933	330.72	0.218109	121.912	-0.262265
411.4	0.148691	144.69	0.705853	410.434	0.260983	595.965	0.124254	598.206	0.0118323	369.899	-0.294624
461.553	0.0296424	50.4799	0.701623	629.385	0.144804	588.809	-0.0438514	195.849	0.0521016	612.505	-0.186999
204.022	0.441865	102.289	0.573299	533.444	0.0351319	802.772	0.207959	289.579	0.287301	651.272	-0.0155323
383.191	0.247954	280.901	0.228947	608.692	0.278488	142.675	0.102108	519.284	0.177233	436.807	-0.233794
207.327	0.478722	217.664	0.316568	616	0.0240347	660.162	-0.000161648	664.247	-0.0027107	622.319	-0.10652
335.457	0.289889	181.677	0.262654	191.98	0.552757	219.659	-0.106021	422.921	-0.139578	508.982	-0.0630906
440.071	0.576233	719.148	0.306554	419.284	0.102793	250.312	-0.172422	456.426	0.324502	481.956	-0.0629753
532.024	0.0944912	547.09	0.344779	402.779	0.264375	314.494	0.193757	257.209	0.14861	535.706	0.00567818
603.785	0.360211	758.559	0.197161	382.957	0.205128	467.767	0.044614	221.825	0.00910974	655.563	-0.178446
840.032	0.53428	241.726	0.370274	545.12	-0.0878253	387.252	-0.11478	396.114	0.164335	178.361	-0.358917
809.074	0.288763	172.432	0.454746	500.312	0.11369	392.173	0.207119	244.299	0.11624	562.603	0.0900441
50.5594	0.679016	320.411	0.24661	515.861	0.115961	242.1	0.209888	457.343	0.124964	196.402	-0.112411
265.754	0.344284	93.3524	0.793996	562.855	0.362634	496.114	-0.147502	336.578	0.0777094	230.705	-0.272105
185.899	0.604715	104.433	0.482576	472.665	0.260344	345.614	-0.117681	40.6971	0.19113	174.6	0.0708579
257.29	0.227297	357.622	0.0869983	559.715	-0.0194116	510.243	0.256679	210.55	0.182038	206.049	0.246445
229.578	0.252844	869.698	0.175584	503.891	-0.00430536	377.467	0.000547469	644.628	0.121102	25.1247	-0.255192
474.091	0.260193	706.641	0.235289	628.351	-0.0773262	597.333	-0.0401164	440.028	0.00845492	452.673	-0.0822912
429.418	0.225234	909.299	0.0684339	685.552	0.361025	813.115	-0.0546633	131.577	0.112169	473.142	0.0401073
585.219	0.369185	127.15	0.640657	943.295	0.0263313	732.178	-0.189315	84.7083	-0.047799	525.381	-0.0703137
805.214	0.227698	200.268	0.635583	637.23	0.062452	673.132	-0.0756326	358.164	0.0169155	348.999	-0.0786514
688.916	0.295131	254.475	0.327267	691.741	0.0532989	849.618	-0.180882	291.73	0.0838588	491.433	0.0497909
309.526	0.130172	296.753	0.280699	457.93	-0.0581049	680.023	0.138561	467.652	0.10504	423.652	-0.0410156
204.243	0.445682	317.555	0.274468	704.561	0.0473961	612.75	0.143892	732.462	0.0839117	680.198	-0.0307126
306.017	0.0832859	849.579	0.363665	924.696	0.130369	583.545	-0.173118	407.779	0.169976	532.771	0.10437
266.693	0.11826	676.21	0.279339	806.489	0.031866	829.627	-0.0195962	282.633	0.198144	610.452	0.133582
507.18	0.170199	888.485	0.246201	901.058	0.237128	207.5	-0.229222	527.524	0.137308	412.826	-0.136683
448.616	0.131206	151.907	0.634585	896.789	0.104261	669.351	0.225156	855.659	-0.000826001	667.617	-0.179306
608.697	0.281068	230.61	0.351537	341.68	0.100651	468.542	-0.0205013	616.573	-0.0134715	910.343	-0.175037
821.776	0.160323	187.924	0.625838	210.861	0.227703	495.215	-0.0567396	406.356	0.276421	900.825	-0.0280317
696.553	0.244043	225.664	0.292955	204.267	0.164488	550.483	0.117971	237.79	0.0676477	731.514	-0.165099
182.018	0.501358	762.47	0.280181	439.915	-0.0574498	372.058	-0.0799348	49.3077	-0.162021	918.603	-0.176546
219.388	0.400179	591.395	0.325524	309.405	0.12582	516.188	-0.0528611	194.117	0.13875	799.531	-0.0665181
318.129	0.572233	802.023	0.131098	339.42	0.0402172	443.354	-0.0231566	432.496	0.105479	755.501	-0.0308057
518.905	0.29536	382.374	0.248107	372.575	0.237934	700.271	-0.0438008	675.073	0.107523	761.778	0.0186136
555	0.396826	306.83	0.329186	285.318	0.170562	552.115	-0.122054	436.914	0.10074	948.38	-0.162664
672.203	0.294604	132.899	0.523567	428.452	-0.0014807	635.339	-0.0960255	198.22	0.181157	126.491	-0.279568
911.8	0.349458	650.637	0.386913	354.982	-0.0305511	437.843	0.234598	413.87	0.163511	825.427	0.00571644
840.223	0.30259	477.161	0.404301	505.748	-0.0617734	692.735	0.0907296	837.82	0.0374677	271.303	-0.0744207
324.557	0.127558	689.3	0.301249	495	0.323385	935.404	0.0963563	610.952	-0.0449097	88.0696	-0.296691
365.263	0.191779	195.156	0.418176	774.726	0.00979459	922.882	-0.00635159	276.821	0.204416	136.895	0.00842315
604.944	0.239361	439.109	0.089927	474.743	0.105783	756.526	0.0290197	164.062	-0.0200231	207.183	0.217693
593.511	0.175433	959.854	0.129981	535.35	0.0394341	943.663	-0.0095582	195.386	-0.0405471	217.083	-0.133645
737.924	0.287098	794.933	0.201152	334	-0.0628887	824.14	-0.0721254	89.1994	-0.100415	375.541	-0.0658334
968.463	0.206668	999.517	0.0575777	513.055	0.0838103	779.174	0.109134	585.165	0.135774	326.014	0.0942415
865.237	0.245216	303.646	0.217228	733.012	0.266827	782.704	-0.0246919	809.834	0.152888	333.401	0.0181494
128.77	0.565352	785.92	0.180685	634.158	-0.0467666	973.091	0.00616449	602.167	0.0939694	184.754	-0.0167719
299.777	0.380773	628.771	0.311346	715.62	0.209246	151.1	0.376096	340.533	0.305568	306.961	0.00819874
346.816	0.19226	825.201	0.0426055	719.592	0.00893897	848.397	-0.00290298	502.494	0.0826159	308.727	-0.0327872
453.408	0.283356	537.522	0.176067	376.59	0.0218503	184.091	-0.106331	991.283	0.0999255	547.579	-0.0171499
693.41	0.399267	365.836	0.12793	263.909	0.394457	452.838	0.00546008	770.458	-0.0394636	413.731	0.120092
631.897	0.24105	576.969	0.225839	134.208	0.306115	501.652	0.0478705	351.079	0.00888515	423.209	0.0916917
245.879	0.316563	173.476	0.458979	452.749	0.0692532	340.009	0.0452048	316.836	0.266321	221.317	-0.0103141
238.341	0.4637	39.7087	0.581944	294.938	0.0868219	100.778	-0.0417126	300.167	0.195419	475.69	-0.139257
372.911	0.315392	212.277	0.181587	414.873	0.1515	266.912	0.0848663	76.3217	-0.162569	720.004	-0.129739
606.504	0.28688	140.557	0.189267	335.515	0.15864	127.183	0.239659	203.329	-0.0106819	743.956	-0.0484051
522.485	0.235755	288.931	0.0845786	184.796	0.277913	424.237	0.0301695	77.573	-0.105418	539.89	-0.157626
158.311	0.223603	163.666	0.274527	193.418	0.133796	417.867	-0.0536132	194.487	0.0531967	726.722	-0.166832
163.726	0.445794	497.651	0.00661385	228.269	0.133103	539.073	-0.0731649	211.498	0.0325111	615.371	-0.0469496
401.487	0.523689	270.567	0.322348	507.318	0.0472406	693.731	0.11535	86.7968	0.0711198	582.634	-0.0248663
381.251	0.378952	145.022	0.142884	604.732	0.272659	515.787	0.280376	148.468	0.166101	618.466	0.026675
165.17	0.421713	281.98	0.160976	319.965	0.264169	620.423	-0.0691932	275.351	0.158351	762.615	-0.137066
376.247	0.323149	340.193	0.0215865	346.319	0.185681	765.69	0.103599	159.472	0.16622	71.1073	-0.302202
285.686	0.328313	448.922	0.252827	110.658	0.375061	540.012	0.128193	163.973	0.333391	659.731	0.0654131
240.26	0.619861	432.504	0.017992	590.988	0.0695953	443.516	-0.101043	690.815	0.024403	586.718	0.0285777
232.703	0.426219	221.02	0.174136	774.742	0.053414	359.209	0.148094	522.597	-0.0512919	423.4	0.124189
182.302	0.598099	104.71	0.396539	493.296	0.284444	679.2	0.181214	730.514	0.114689	249.099	-0.0437084
517.465	0.201688	360.035	0.191657	640.13	0.207266	414.864	0.00855291	108.396	-0.139754	218.367	-0.00198007
100.159	0.594384	222.626	0.181773	592.819	0.331545	474.548	0.0371839	196.413	0.0491402	435.564	-0.0851586
91.138	0.643227	96.566	0.491189	113.853	0.391057	277.717	0.0791337	362.715	0.27165	34.5047	-0.294178
292.34	0.106897	188.762	0.357385	413.113	0.0480729	386.04	0.00171989	129.156	0.0611104	175.794	-0.116487
485.523	0.104705	217.083	0.278096	101.766	0.577236	161.59	-0.0637196	211.954	0.202084	434.945	0.159661
387.3	0.138013	429.564	0.0861982	192.11	0.202585	93.3821	0.414713	180.847	0.196341	471.605	0.119959
475.274	0.206172	323.687	0.314587	171.026	0.591396	222.934	0.147179	383.441	0.264342	324.728	-0.0766336
598.956	0.180199	325.319	0.129974	107.848	0.561913	115.112	0.0539166	399.414	0.319792	84.6199	-0.12998
403.789	0.24907	422.404	0.2734	362.406	0.121894	240.69	0.0682983	313.625	0.316506	288.757	0.101283
937.083	0.17991	438.534	0.126266	272.855	0.0792987	270.52	0.166557	810.149	0.0833395	142.197	-0.118802
835.006	0.350682	147.054	0.2481	440.944	0.0755673	355.004	0.0149981	638.181	0.179584	416.122	-0.0428094
732.88	0.189265	384.131	0.0783784	289.935	0.285714	522.107	0.000410736	847.504	0.0279914	393.073	0.103088
821.191	0.406646	365.274	0.308878	610.952	0.0515667	427.694	-0.140651	365.161	0.0371412	528.321	0.0339313
792.553	0.248526	647.09	0.282903	341	0.21982	436.34	0.0328317	230.155	0.131573	694.027	0.00430954
873.008	0.0868807	480.63	0.200999	407.508	0.155144	584.911	0.003869	107.529	-0.0570055	535.252	-0.116831
696.634	0.14685	364.015	0.0151024	305.092	0.0275387	375.91	0.113744	307.663	0.168776	609.691	0.00620896
518.448	0.185111	121.65	0.408094	302.593	0.257263	298.767	0.0296881	200.086	0.171889	760.639	0.112661
524.103	0.166321	196.54	0.0334913	522.261	0.0775842	293.115	0.0159617	319.185	0.198451	542.865	-0.0541716
242.622	0.330036	118.761	0.499969	468.195	0.0593157	522.729	0.181328	196.035	-0.0133989	451.293	-0.110782
333.394	0.410785	189.605	0.145718	520.601	0.351775	388.433	0.00582403	12.5	0.07464	380.145	0.124419
353.958	0.332353	325.708	0.146265	541.202	0.141269	356.478	0.0788072	314.081	0.273771	684.994	-0.0229754
451.291	0.351945	270.481	0.0823647	302.655	0.180205	238.993	0.345739	791.834	0.12584	380.382	0.106215
371.631	0.45757	362.302	-0.000447989	192.76	0.14864	116.431	-0.104538	635.814	0.00313884	488.377	-0.137874
768.146	0.22252	418.151	0.131042	135.208	0.29636	352.358	0.0741448	831.031	0.30272	440.54	0.0293597
809.069	0.272633	276.236	0.0955475	194.583	0.431826	438.182	0.129026	415.405	0.0401648	203.731	-0.361893
919.075	0.345001	181.246	0.179268	98.9002	0.625459	387.912	-0.0697633	280.454	0.221048	304.211	0.00482047
738.752	0.279336	497.041	0.0731232	260.36	0.176304	134.496	0.0717622	137.5	-0.0117111	362.026	0.0908093
961.585	0.203179	195.926	0.289232	173.385	0.101257	115.109	0.70563	355.563	0.267069	427.858	-0.132198
829.388	0.23943	317.274	0.0958737	340.413	0.120955	142.697	0.455356	250.525	0.238619	401.598	-0.0287771
824.754	0.0846522	90.0347	0.456338	314.086	0.185243	393.192	0.238889	367.813	0.242278	256.562	-0.026742
531.698	0.356863	184.56	0.134041	570.636	0.188015	529.442	-0.0608327	214.268	-0.00759172	122.907	-0.30369
191.05	0.558955	208.597	0.253659	274.055	0.236242	208.716	0.269605	62.9484	0.0833683	144.629	-0.296958
277.601	0.161976	209.011	0.164989	337.38	0.170072	393.74	0.163451	353.642	0.222648	138.067	0.0497556
422.645	0.116787	284.396	0.127788	192.76	0.330173	318.159	0.118344	810.602	0.0919559	303.356	-0.0624475
319.785	0.17746	300.666	0.180385	363.593	0.0342318	335.792	-0.125748	659.72	0.0398327	460.987	-0.087878
392.973	0.280768	522.015	0.156876	573.482	-0.0394238	462.5	-0.00796461	849.371	0.275201	371.2	-0.00416505
535.683	0.178303	412.565	0.156275	429.891	0.369488	452.383	0.125891	232.754	0.00328535	230.718	0.0672073
318.208	0.0625093	95.8188	0.438804	518.52	0.235611	401.528	0.366079	169.231	-0.0413539	16.7705	-0.443931
847.736	0.187555	278.265	0.100186	516.152	0.250492	427.612	-0.021415	182.517	0.0510273	265.577	-0.29069
735.004	0.293519	152.173	0.36033	464.926	0.0779749	282.685	-0.212292	75.208	-0.00559378	514.059	-0.269369
636.656	0.247483	351.141	0.120848	269.595	0.337384	412.097	0.0652143	130.271	0.104974	601.775	-0.0142436
721.284	0.389762	115.766	0.538015	394.161	0.0552146	600.158	0.0864623	250.753	0.158629	329.251	-0.184804
694.033	0.262642	302.789	0.117183	339.089	0.0761105	496.785	0.0653438	181.109	0.126848	515.861	-0.139594
778.235	0.084858			84.5772	0.526102	366.253	-0.220021	256.479	0.279727	424.86	-0.0886579
618.107	0.176834			153.501	0.289547	139.112	0.40666	350.904	0.223096	418.001	-0.024228
324.519	0.175964			95.8188	0.702037	371.459	0.274051	888.313	0.0525734	506.964	0.0260705
546.171	0.0731952			459.184	0.0733234	625.518	0.141721	716.036	0.0384721	566.376	-0.292507
453.666	0.122589			484.381	0.109557	746.036	0.0766762	927.692	0.11172	278.624	-0.362135
550.821	0.173905			230.014	0.270753	416.198	0.291053	388.025	0.119054	505.509	0.0788362
658.032	0.125589			235.85	0.173208	602.727	0.328812	275.69	0.120373	470.697	0.137198
489.7	0.21852			111.608	0.359753	556.475	0.0969373	83.7204	-0.0696102	242.5	0.131949
1016.07	0.153007			559.464	0.103537	560.195	-0.219643	254.52	0.135721	243.427	-0.132393
925.166	0.287281			716.436	0.0190884	650.342	-0.0220025	225.581	0.17362	286.356	-0.106696
818.707	0.180572			387.177	0.148466	690.904	0.070204	377.475	0.185698	407.492	-0.120778
912.277	0.451015			547.323	0.100373	226.443	0.330656	10.1622	-0.0825081	288.021	-0.0136726
880.699	0.223527			485.502	0.256042	648.884	-0.126252	185.09	0.121121	151.356	-0.160801
957.209	0.134653			205.973	0.164141	240.65	0.0191891	431.812	0.16684	186.028	0.0901052
767.207	0.085412			119.085	0.40078	333.574	-0.0681149	951.238	0.109182	234.716	0.195736
254.091	0.235696			125.897	0.321603	271.659	-0.00219178	786.671	0.0419751	110.454	-0.128603
197.294	0.531471			400.461	0.240669	120.59	0.518494	990.89	0.167244	189.506	-0.148866
316.381	0.53441			313.498	0.14554	145.022	-0.140197	120.571	-0.0413262	369.166	0.0053196
354.868	0.149769			473.3	0.0948983	210.134	-0.136833	52.0928	0.00981885	262.903	-0.0430202
534.421	0.275461			215.015	0.208068	424.625	-0.0544462	262.494	0.102036	231.038	-0.127277
764.465	0.321289			571.123	0.106202	464.05	-0.0608603	185.645	0.0493219	129.928	-0.0265707
777.741	0.28221			340.037	0.211425	290.097	-0.226208	101.601	0.159312	310.976	0.0117103
622.179	0.446854			404.822	0.057009	458.53	-0.146977	61.9016	0.213592	534.936	-0.0386161
799.57	0.339704			365.736	0.0107264	308.677	0.205758	330.26	0.15287	543.528	0.0493169
704.064	0.39489			204.71	0.414337	283.835	0.155965	244.93	0.15384	387.306	0.061518
739.366	0.356558			425	0.258734	371.517	-0.033108	132.844	0.210128	563.604	0.203185
490.822	0.138806			431.697	-0.0327858	456.981	0.105582	669.258	0.0797337	416.691	-0.110497
103.895	0.592623			452.942	0.389963	378.029	-0.194436	496.727	0.0493475	378.368	-0.268314
127.561	0.440732			490.516	0.204416	369.087	0.111031	708.56	0.0647584	428.165	0.0425873
113.6	0.693032			125.225	0.283807	257.097	-0.0470557	240.286	0.0254044	565.934	-0.157391
537.544	0.140507			87.3212	0.350643	109.505	-0.0959332	159.015	-0.000258327	274.329	0.0903559
513.587	0.228038			197.316	0.356498	332.228	0.102425	285.974	0.0893648	456.39	-0.169178
585.829	0.291778			116.539	0.257059	319.345	0.0937435	303.645	0.116941	700.664	0.170786
406.379	0.222898			267.605	0.340814	443.741	0.00741446	187.925	0.177187	512.158	0.0819748
631.825	0.252598			214.257	0.19333	615.147	-0.0199227	165.592	0.18018	371.245	0.0627233
496.364	0.198103			436.069	0.044523	490.167	-0.0728493	373.516	0.162883	349.857	-0.000908613
503.328	0.188191			149.164	0.293561	525.101	-0.0473324	219.915	0.248721	563.072	0.0463945
236.937	0.478077			215.537	0.125298	677.726	0.00498176	88.4786	0.0577291	109.345	-0.124861
119.091	0.718311			188.58	0.128637	467.233	0.333371	587.395	0.143884	159.109	-0.0600775
216.001	0.312583			297.542	0.0845571	383.275	0.195828	421.42	0.0436478	434.173	0.116957
449.757	0.257399			482.597	0.0743359	342.144	-0.0580617	627.101	0.150404	534.624	0.114228
576.091	0.302196			294.809	0.229094	612.439	0.0993364	333.797	-0.0053736	317.805	-0.0378004
586.158	0.352124			390.2	0.26519	360.113	0.127306	351.189	0.134622	131.196	0.115476
425.184	0.430954			381.387	0.252198	430.953	0.299868	529.009	0.240791	157.948	-0.195014
616.411	0.26036			95.6883	0.662632	150.546	0.270351	476.347	0.161322	46.8529	-0.327406
508.411	0.391097			318.752	0.128314	335.963	0.0660349	397.724	0.204773	374.277	-0.0223289
542.966	0.368229			241.661	0.162806	472.041	0.0584241	276.84	0.186613	427.763	0.0800735
314.295	0.308073			382.957	0.0469314	449.994	-0.00915182	612.433	0.30185	493.666	0.015533
192.311	0.330626			122.729	0.516845	508.246	-0.0555198	465.007	0.189103	615.513	0.0720789
434.192	0.216056			453.225	0.130787	250.023	0.230544	173.817	0.183854	407.588	-0.085445
466.535	0.218226			230.99	0.257769	521.053	0.048064	373.867	0.0796316	573.242	0.0591142
472.354	0.358819			292.938	0.209011	611.911	-0.0663353	200.415	0.0462235	700.179	0.114506
306.348	0.460364			312.02	0.0738348	350.14	0.126257	412.462	0.160133	457.746	0.0611533
510.31	0.30406			176.812	0.221089	233.319	-0.0199397	424.24	0.0377663	352.225	-0.0231608
390.859	0.420049			379.251	-0.0205777	92.5522	0.605664	389.606	-0.0249023	250.45	-0.108574
425.011	0.272311			312.94	0.153187	461.646	0.038923	510.747	0.0268744	589.221	-0.0533198
226.122	0.332658			349.607	0.336657	607.306	0.07133	532.124	0.0474971	490.057	0.158757
625.799	0.0604591			375.832	0.255879	226.813	-0.10507	424.855	0.0316753	372.405	-0.0434371
439.118	0.163995			275.493	0.189375	328.021	-0.0360938	352.032	0.0680711	517.54	0.0255036
579.925	0.306305			187.766	0.10516	385.411	0.00465643	602.527	0.0868922	287.511	-0.324509
389.166	0.143719			350.089	0.0919414	447.255	-0.0919819	423.741	0.151619	405.66	0.0259971
641.507	0.195205			216.232	0.242965	575.78	-0.18665	219.564	-0.00811327	462.013	0.108097
481.3	0.144306			505.625	0.231732	393.445	0.147955	362.525	0.0475762	525.244	-0.0154475
456.269	0.0527539			234.361	0.21721	527.064	-0.0727856	216.034	-0.0261035	473.524	0.0152555
160.078	0.650241			300.926	0.157078	656.943	-0.0198369	401.637	0.14229	306.24	-0.0237229
764.199	0.245655			241.997	0.0889228	419.266	0.00770009	497.254	0.0147926	49.6236	-0.291788
527.885	0.185201			267.079	0.0685126	318.112	-0.0632406	502.989	0.129153	194.971	-0.327105
512.762	0.19869			474.684	-0.0376612	239.737	0.267473	657.405	0.0561823	150.021	0.180515
479.146	0.289022			362.784	0.230578	554.752	-0.0246866	635.108	0.143745	372.802	0.0462416
529.741	0.231864			430.327	0.256165	468.154	-0.151857	546.142	0.142407	480.399	-0.0869823
654.317	0.055706			440.206	0.25012	347.566	0.0168902	437.661	0.168355	419.528	-0.0398031
627.694	0.0917361			89.6157	0.35665	230.272	-0.0999514	746.306	0.0558558	184.114	0.210717
358.974	0.186877			80.1548	0.516326	119.661	0.0210444	578.317	0.095486	88.6707	-0.328725
254.018	0.319534			376.16	0.083566	304.197	-0.046593	321.318	0.202059	177.553	-0.275487
458.019	0.110075			420.035	0.0684307	396.089	-0.0669267	216.328	0.0270686	431.466	-0.245195
276.812	0.271348			146.523	0.428047	199.061	-0.174908	51.1886	-0.15488	578.864	0.00954974
136.862	0.417722			162.002	0.308044	346.939	-0.176624	255.893	0.191525	231.948	-0.286623
280.713	0.17576			101.948	0.363334	194.544	0.439958	734.9	-0.0517948	419.918	-0.210084
192.516	0.343533			478.89	0.0513371	201.546	0.120544	742.579	0.0788699	365.462	0.0293741
99.5301	0.611985			631.937	0.172652	342.802	0.0688077	886.245	0.14	385.398	0.051774
103.983	0.486688			311.241	0.173783	339.544	0.161538	875.353	0.0681731	508.853	0.121867
222.725	0.219336			466.395	0.156939	494.233	-0.117526	784.749	0.139258	496.349	-0.112259
451.401	0.200964			410.6	0.328878	293.614	0.231973	677.46	0.19601	374.583	-0.336159
268.34	0.282431			168.393	0.249278	257.512	0.419308	977.271	0.153596	477.173	0.228072
92.1954	0.72285			318.218	0.168342	507.986	0.291222	799.82	0.187662	603.767	0.209015
145.452	0.489666			445.211	-0.0284127	607.119	-0.0800622	560.966	0.296549	370.962	0.0567437
259.856	0.158463			140.201	0.188549	318.689	0.262772	39.5512	-0.0500877	365.096	0.07448
191.98	0.379815			188.182	0.09796	505.971	0.195627	201.851	0.023019	394.691	-0.0219697
321.403	0.211622			82.8025	0.44084	423.468	0.0448611	40.9023	-0.0213481	540.052	0.0837256
526.67	0.113755			411.172	0.0268304	421.285	-0.0905551	700.686	-0.0346174	305.369	0.0106805
142.149	0.453131			583.551	0.0296317	515.782	-0.0460907	675.288	-0.0265164	121.439	0.00796312
348.174	0.140351			317.539	0.283578	563.205	0.0790478	781.53	-0.0302639	167.966	0.0506797
300.552	0.0137134			451.248	0.0154289	287.793	0.376092	817.454	-0.0246626	336.267	0.0797878
				415.271	0.303163	509.774	0.00520754	709.969	0.0269845	57.717	0.0195456
				423.15	0.0210668	254.092	0.226298	632.205	0.0534084	210.55	0.183504
				392.723	0.0484136	468.507	-0.0383102	874.754	0.0233392	275.92	-0.0646594
				175.82	0.252956	81.3941	0.684455	685.756	0.119652	222.819	-0.0401428
				158.528	0.0764704	253.833	0.0950505	502.078	0.240399	122.679	-0.0286064
				173.277	0.176932	213.571	0.132721	201.687	-0.00788128	200.655	0.0189783
				532.101	0.0879203	276.507	-0.074304	231.625	0.000714242	233.773	-0.0442635
				665.554	0.0202045	445.063	0.0429377	222.968	0.0298594	419.3	-0.0487684
				307.002	0.0721883	325.903	0.104578	182.826	0.166857	414.52	-0.0147693
				474.032	0.0821652	544.162	0.382249	286.208	0.175614	315.159	-0.0113715
				402.531	0.181006	365.298	-0.0120342	470.654	-0.00976229	469.581	0.00885963
				377.26	-0.0185477	389.82	-0.0741602	233.72	0.194744	287.598	0.0675339
				249.061	0.295498	225.527	0.176231	595.972	0.182655	243.272	-0.114333
				293.471	0.346086	132.594	0.570563	266.137	0.214945	315.129	-0.0314602
				398.223	0.130272	159.138	0.116305	324.492	0.027997	437.679	-0.12508
				115.109	0.386888	274.966	-0.266663	329.006	0.191487	409.527	0.0975027
				268.34	0.176637	455.803	-0.240886	417.097	0.146386	323.367	-0.0632389
				251.16	0.184698	110.68	0.436229	362.621	-0.0234373	611.498	0.145509
				238.144	0.329434	790.142	0.1939	472.654	0.212656	374.742	-0.173024
				286.727	0.103375	314.473	-0.167971	361.576	0.230061	437.052	-0.100203
				306.808	0.0648686	510.482	-0.0236784	231.537	0.0316612	480.586	0.0302384
				260.768	0.0754843	519.306	-0.10775	184.195	0.0184652	587.931	-0.209553
				511.768	0.103386	272.932	0.00855726	304.928	0.102081	428.084	-0.0418501
				474.052	-0.039075	195.608	-0.0254412	243.658	0.0349258	245.459	-0.0341932
				460.061	0.0157477	157.634	0.265924	382.262	0.162798	69.5072	-0.355021
				142.85	0.099198	299.961	-0.199471	233.352	0.0341002	302.212	-0.0505081
				202.515	0.12087	810.78	-0.00548744	301.633	0.000139296	92.5338	-0.0853854
				100.062	0.326151	103.724	0.163049	241.373	-0.0454295	330.341	-0.0648773
				66.5676	0.405889	188.099	0.125957	579.701	0.0886737	379.689	-0.00246561
				214.971	0.287657	240.338	0.103461	344.991	0.0142376	347.312	0.120115
				360.772	0.173791	327.843	-0.0975636	237.539	0.19968	65.3877	-0.142542
				491.172	0.251822	507.229	0.125068	297.752	0.184318	168.542	-0.315216
				177.518	0.231293	318.218	-0.00745034	507.18	0.0677993	117.925	-0.409563
				321.374	0.298897	606.228	0.326765	214.507	0.0756672	347.536	-0.251247
				275.919	0.331869	410.195	-0.121072	554.442	0.246037	459.993	-0.0159054
				251.01	0.221741	266.282	-0.0413777	199.076	0.145249	197.563	-0.225465
				408.075	0.418583	383.487	-0.225178	361.153	0.138613	369.07	0.0296515
				514.933	0.108205	570.636	-0.231833	278.5	0.0994433	255.11	-0.122903
				151.348	0.133001	240.845	0.275797	373.271	0.175442	266.317	-0.131162
				315.614	0.219302	793.745	0.266034	262.928	0.014223	397.319	0.092328
				249.825	0.095991	437.479	-0.193761	407.376	0.186857	395.356	-0.295762
				486.113	0.0322907	117.925	0.121644	163.783	0.225115	442.952	-0.324903
				664.915	-0.00197756	304.354	0.217228	296.49	0.192466	358.105	-0.0656837
				391.567	0.370302	150.083	0.30883	445.176	0.0642582	537.583	0.197866
				532.124	0.0916637	686.477	0.103693	275.382	0.174425	300.853	-0.0379252
				490.593	0.339121	177.934	0.258317	637.304	0.167564	341.632	-0.144041
				220.298	0.215875	188.182	0.110723	336.647	0.253289	385.073	-0.0346282
				358.966	-0.0186301	237.026	-0.16647	306.727	0.0745711	497.6	-0.196011
				304.241	0.346803	652.519	-0.0908912	385.503	0.204625	353.306	0.0161259
				377.376	-0.0213288	92.2699	0.356554	464.953	0.173977	180.689	-0.0526557
				403.19	0.0431287	394.248	-0.0529438	452.528	0.0936099	99.5615	-0.217849
				257.694	0.284345	681.547	0.0155536	535.395	0.264094	252.392	0.0786053
				363.739	0.14635	150.576	-0.018991	189.506	0.158096	30.5164	-0.0877436
				171.555	0.098785	833.682	0.216192	76.0345	-0.047513	252.797	-0.00880873
				99.5301	0.409219	244.312	-0.0771706	281.525	0.0689709	362.436	-0.0804286
				106.888	0.290287	728.362	-0.140111	63.1009	-0.038493	293.631	0.0463958
				188.776	0.199512	67.3146	0.59105	313.299	0.115979	138.007	-0.148971
				404.305	0.00152999	214.039	0.260822	157.421	0.0667095	114.51	-0.248814
				645.121	0.165322	107.616	0.395508	171.701	-0.072785	212.426	-0.130666
				881.139	0.179993	334.15	-0.0157721	112.805	0.0423281	439.104	-0.149097
				877.302	-0.00106359	223.607	-0.19078	150.935	0.167447	493.974	0.00412291
				223.112	0.168326	134.768	0.301609	365.966	0.118864	289.914	0.00277537
				460.85	0.196574	365.034	-0.104334	250.743	0.224562	464.711	0.111336
				701.678	0.186672	287.772	0.173228	438.656	0.283155	330.549	-0.0777968
				692.065	0.0814472	372.508	0.290376	325.391	0.0299095	312.02	-0.178246
				312.86	0.203946	786.384	0.128531	474.362	0.114228	401.878	0.0326784
				557.702	0.220489	582.634	0.338795	278.109	0.266699	477.297	-0.263012
				524.049	0.250534	525.482	0.360723	176.404	0.0600232	356.388	-0.139284
				246.83	0.306062	758.094	0.412616	223.739	0.159809	398.304	-0.118942
				232.371	0.191364	215.711	0.139307	412.095	-0.0444447	697.58	0.102532
				95.2941	0.408653	172.952	0.180872	161.146	0.0766656	490.633	0.0167557
				308.322	0.0341571	366.828	-0.128313	112.157	-0.0936023	385.844	0.0722807
				338.462	0.0791617	178.973	-0.105265	322.602	0.137791	379.597	-0.0231775
				330.112	0.0335682	194.052	0.173118	19.8132	-0.129298	580.063	0.083432
				454.32	0.399848	361.464	-0.170248	363.817	0.160799	172.12	-0.0348537
				602.536	0.249344	224.513	0.143264	273.324	0.0374051	109.179	-0.0244578
				549.801	0.0755432	308.15	0.287111	459.708	0.167604	365.088	0.0299315
				497.532	0.214859	724.59	0.0680939	200.246	0.190658	494.871	0.0302747
				300.26	0.14445	518.369	0.21881	262.928	0.0745932	250.59	-0.0497701
				415.888	0.169874	460.027	0.254977	121.989	0.0523874	138.035	0.0865297
				82.0056	0.3139	694.127	0.258031	368.248	-0.0974466	120.909	-0.0672354
				492.976	0.144369	277.68	0.243267	85.1469	0.0578242	45.4642	-0.34627
				618.289	0.233063	189.159	0.0718285	114.483	0.0754927	293.25	-0.00825679
				413.935	0.0920513	152.684	0.0999869	240.117	0.16642	375.458	-0.0151806
				536.773	0.0792711	194.743	0.0444779	87.6567	4.01139e-05	412.911	0.0512391
				148.598	0.487994	151.038	0.0737648	477.429	0.149331	531.79	0.0126877
						276.134	0.112938	392.414	0.0600523	354.11	-0.00636041
						349.464	0.231294	573.698	0.149577	491.571	0.0712177
						704.282	0.166484	315.295	0.0807727	615.628	-0.0162165
						533.128	0.309185	299.96	0.0897549	374.686	0.0738708
						494.172	0.150073	215.239	0.0698532	272.659	-0.0656393
						695.472	0.130801	487.234	-0.067881	204.124	0.103422
						339.485	0.131059	203.965	0.0520989	509.356	0.0161608
						324.933	-0.143947	212.539	0.202808	486.942	0.1184
						109.345	0.302059	220.717	0.101332	303.638	-0.00255585
						423.505	-0.0736408	110.694	0.14221	626.215	0.07191
						395.387	0.221175	543.375	0.193503	410.038	-0.0475775
						480.059	0.243687	420.595	0.0689077	334.997	-0.00829232
						893.69	0.142334	536.889	0.00946099	344.039	-0.088065
						690.222	0.204269	386.662	0.202682	525.987	-0.0602479
						632.742	0.163924	146.031	0.0705293	196.866	0.143835
						865.708	0.371301	337.065	0.176877	30.7785	-0.142405
						341.55	0.13545	499.124	-0.00504661	280.947	-0.0137094
						230.177	0.287328	272.546	0.106991	406.836	-0.0239004
						197.563	0.327392	204.267	-0.0141753	164.81	-0.0289618
						465.195	0.229274	411.005	0.0908762	115.434	-0.0456363
						536.546	0.19333	128.345	0.0170261	196.548	0.162429
						863.688	0.0755634	553.54	0.164798	107	-0.0123421
						709.952	0.162991	582.516	0.0599211	228.831	0.0677328
						676.581	0.114042	802.948	0.0085761	285.843	-0.0660253
						863.771	0.142251	480.181	0.239269	346.13	-0.0823559
						287.511	-0.0761074	710.634	0.018235	500.88	0.0435222
						241.35	0.0665045	385.957	0.212682	396.936	0.184993
						123.744	0.121385	663.061	-0.102799	427.003	-0.0173365
						198.148	0.0989677	470.804	0.209512	568.869	-0.04713
						580	-0.0758827	555.023	0.166887	351.826	0.319752
						392.381	-0.141105	215.523	0.186972	270.416	-0.0776637
						347.32	-0.136188	517.75	0.0390272	263.557	0.303217
						561.877	-0.188724	939.897	0.149408	497.198	-0.0397613
						328.805	0.0563829	837.929	0.026775	418.218	-0.0296605
						385.649	0.221508	975.666	0.0134285	326.12	-0.0564404
						470.744	0.249408	776.268	0.0614448	773.255	0.194413
						867.504	0.188356	570.088	0.115391	569.956	0.00297862
						676.018	0.170226	681.735	0.0049327	453.756	0.118474
						625.125	0.232508	925.662	0.0284039	439.41	0.0203586
						848.105	0.311658	658.829	-0.00852644	647.616	0.172407
						352.58	0.10405	625.18	0.0237802	205.091	-0.113229
						402.88	0.0102519	611.596	0.0919287	189.329	-0.0179247
						677.089	-0.0156353	514.243	0.0362212	435.029	0.0629442
						543.519	0.146476	907.528	0.0901738	574.777	0.0882863
						521.734	0.129022	852.445	0.133902	323.468	-0.0631547
						684.238	-0.0652928	1045.38	0.0144464	205.015	0.0919502
						85.5862	0.544992	760.146	0.150036	62.5029	-0.327153
						500.212	0.127618	724.819	0.128647	95.5928	-0.318966
						295	0.227017	640.312	0.127045	348.193	-0.0520307
						240.065	0.194676	948.98	0.0237606	453.542	0.0702716
						470.326	0.28269	666.188	0.18679	466.436	0.0436801
						419.002	0.308027	684.37	0.0828726	551.589	0.0656598
						210.238	0.466671	472.665	0.0535573	312.526	-0.129358
						154.536	0.308995	574.237	0.202138	541.768	0.0662903
						385.981	0.444044	772.904	0.111121	648.002	0.0950436
						216.015	0.0765305	698.176	0.0258651	392.46	0.0311604
						282.898	0.126912	876.641	0.0609726	279.162	-0.061268
						73.5272	0.488324	615.378	0.0960998	155.02	-0.204827
						67.3146	0.561624	534.813	0.153953	513.128	-0.0380356
						175.873	0.313393	502.556	0.0523771	562.161	0.203173
						238.354	0.307876	793.426	-0.0564957	284.785	-0.0472411
						52.5595	0.399491	509.418	0.0436865	727.955	0.0303296
						235.929	0.0253584	511.591	0.0503041	492.83	-0.187214
						129.156	0.273335	381.608	0.0703681	557.486	-0.123215
						99.1497	0.539414	397.336	0.110252	597.704	-0.0165586
						137.704	0.333754	912.428	0.13388	710.634	-0.132463
						352.996	0.0520875	872.084	0.174499	514.569	0.19427
						110.68	0.21515	1074.9	0.0740063	331.645	0.00304025
						483.768	0.222992	774.505	0.178739	171.701	-0.0805612
						372.307	0.0840305	783.282	0.232073	409.614	-0.0677439
						787.29	0.263867	652.921	0.180615	205.548	-0.0276225
						761.581	0.234214	968.327	0.0387901	423.63	-0.00450909
						653.973	0.157034	691.204	0.279931	401.55	0.0178297
						287.446	0.0899879	722.05	0.167438	413.731	0.202502
						180.918	0.126193	465.678	0.0275171	91.5984	-0.0138651
						151.19	0.392776	617.995	0.264205	284.879	-0.127901
						158.114	0.302727	846.777	0.0779893	59.4243	-0.473856
						393.156	-0.000270247	779.776	0.0572306	225.014	-0.205328
						103.983	0.400379	963.846	0.0308992	409.11	0.0255423
						523.002	0.138207	692.874	0.140768	119.504	-0.42864
						396.611	0.0910793	626.997	0.17927	255.539	0.0104302
						790.546	0.154604	576.466	0.0190061	157.341	-0.0425543
						773.971	0.060405	875.743	-0.0596607	217.744	-0.033522
						668.978	0.0127963	591.36	0.102537	390.288	0.08993
						106.8	0.0558494	599.604	0.0627209	281.347	-0.0954267
						149.34	-0.109811	432.464	0.0487541	565.138	-0.261713
						272.259	-0.086681	486.466	0.115321	305.975	0.00744748
						293.084	-0.00589919	901.124	0.010543	1039.57	0.0597415
						311.388	0.00410086	815.096	0.018136	804.988	0.132003
						404.112	0.0654073	977.423	0.0539448	778.966	-0.0681016
						399.531	0.174176	740.075	0.0289075	788.432	-0.0745931
						863.894	0.0149744	599.568	0.12523	966.45	-0.0657051
						800.878	-0.0749067	633.093	-0.0650518	589.221	-0.0931262
						688.39	0.0632577	908.023	-0.030923	475.526	0.0239902
						52.295	0.520129	628.102	0.00930148	521.734	-0.00526452
						186.765	0.283025	614.334	0.0822581	751.962	0.0415193
						297.654	0.145165	526.219	-0.0157448	477.624	-0.082323
						210.965	0.31862	498.691	0.161566	549.557	0.0339099
						424.382	0.0184863	672.909	0.170415	331.54	-0.0519518
						367.466	0.0401137	562.25	0.115865	463.001	-0.0955584
						820.08	0.274633	695.216	0.0264877	387.867	-0.0377774
						772.739	0.269302	510.111	0.211392	613.54	-0.0187933
						660.956	0.175059	299.666	0.0296027	435.467	0.0982155
						134.55	0.450645	431.35	0.114925	307.663	0.0096339
						275.053	0.138324	647.341	-0.0224013	103.233	-0.244365
						162.298	0.310521	391.352	0.120524	462.527	0.129632
						405.121	0.124719	346.771	-0.0217563	440.028	0.0804992
						327.384	0.0581841	428.777	0.0875394	223.677	0.00976747
						773.452	0.279639	240.703	-0.0169028	193.81	0.0164977
						730.769	0.220042			243.516	0.0243467
						619.693	0.110465			207.44	-0.0730755
						251.074	0.154132			844.042	0.0314698
						77.5403	0.520937			119.116	-0.156937
						376.14	0.0718022			744.167	0.178372
						238.537	0.0111701			515.764	0.0216195
						652.888	0.306306			472.192	-0.00297689
						623.924	0.261873			484.155	-0.100307
						516.315	0.206583			660.137	0.0303561
						328.595	0.176437			313.847	0.0832558
						130.93	0.155088			169.753	-0.0232671
						146.671	0.181565			294.3	0.000481963
						595.707	0.0842586			485.368	-0.0369869
						516.222	0.175537			203.854	-0.0738889
						404.967	-0.0215472			251.508	-0.0616409
						452.942	0.0932697			153.937	0.0395833
						304.569	0.0984617			191.166	-0.059086
						686.604	0.16712			182.652	-0.106289
						671.328	0.245475			348.802	-0.0202515
						567.588	0.0660149			296.142	-0.133229
						198.069	0.147741			385.503	-0.0625741
						558.195	0.0515969			269.582	0.127087
						455	0.148174			368.409	-0.0926409
						352.58	0.0187216			474.058	-0.064111
						465.094	-0.0742195			228.172	-0.102629
						405.625	0.128047			131.933	-0.157884
						293.566	0.0651455			169.06	0.12396
						138.406	0.291784			365.462	-0.0960402
						207.741	0.167172			542.275	0.0472713
						112.528	0.391915			188.287	-0.0599344
										805.876	-0.0262809
										579.747	-0.00311649
										523.091	-0.0142262
										528.607	-0.0832994
										714.02	0.00472873
										333.888	0.108021
										218.951	0.042455
										358.199	0.0286613
										551.801	-0.0378621
										270.416	-0.0521568
										288.812	0.0717049
										115.302	0.065087
										206.716	-0.136235
										239.395	-0.10953
										415.369	-0.0320231
										345.733	-0.27583
										394.406	-0.0230547
										209.515	0.10726
										412.348	-0.248881
										496.614	0.0947853
										235.651	-0.133285
										120.675	0.0093382
										104.403	0.038843
										355.431	-0.0934327
										601.586	0.0156654
										142.575	-0.042661
										600.119	0.0023281
										402.647	0.156252
										283.915	-0.0586659
										279.564	-0.242293
										478.154	-0.0309273
										116.887	0.104633
										67.2098	-0.275255
										340.771	0.158776
										423.197	0.107479
										225.846	-0.0505528
										37.8319	-0.151057
										222.286	0.268855
										79.7316	-0.103956
										307.569	0.0165554
										320.351	-0.00859308
										422.211	0.0471056
										583.631	-0.00217617
										452.615	0.203199
										503.55	0.0841541
										650.562	0.0411681
										433.647	0.180155
										346.888	-0.132739
										305.624	0.313662
										577.603	-0.0405761
										388.973	0.153096
										393.219	-0.112947
										715.351	-0.00861955
										490.771	-0.124559
										599.162	0.040195
										648.845	0.131299
										729.555	0.0780326
										602.832	0.00576019
										418.979	0.0763226
										182.91	-0.0365598
										388.782	-0.0916444
										269.072	0.117166
										506.372	0.240633
										514.347	-0.0178304
										512.984	-0.0380478
										185.65	0.0841768
										291.773	-0.0537177
										66.0019	-0.425489
										249.412	-0.180432
										517.106	0.0211858
										27.5	-0.496388
										215.523	-0.0577102
										250.562	-0.063302
										330.246	-0.00984955
										505.396	-0.0632329
										338.425	-0.0827582
										579.143	-0.0789926
										415.446	0.159625
										931.087	-0.0745306
										710.255	-0.118224
										814.08	0.073476
										859.757	0.0859438
										949.714	0.143113
										780.417	-0.00962424
										598.952	0.1351
										400.827	0.128638
										605.01	-0.083524
										469.608	-0.00462556
										691.507	0.0679036
										630.202	0.0621248
										672.888	0.0326147
										359.928	0.0246542
										511.872	0.126401
										262.774	0.00882512
										152.52	-0.126523
										539.455	0.040296
										193.197	-0.0811266
										20.1556	-0.291746
										285.591	0.0420222
										402.531	0.0407091
										589.921	0.186057
										260.216	0.0633488
										799.414	-0.0347788
										457.391	0.0997173
										897.49	0.0857046
										662.42	0.177152
										645.945	-0.0342696
										661.064	-0.170762
										830.079	-0.158868
										483.283	0.127582
										346.611	-0.054853
										382.099	0.251465
										609.661	0.135535
										334.897	-0.0875039
										428.551	-0.147799
										254.644	0.183053
										356.532	-0.0141138
										247.63	-0.0207598
										471.01	0.101931
										310.584	0.0927845
										264.197	0.234891
										158.285	0.0880842
										353.076	0.108114
										383.447	0.236828
										120.934	0.0774614
										51.5388	-0.392066
										192.11	0.0939209
										207.002	0.0828741
										704.006	0.156967
										57.5576	-0.239768
										961.105	-0.0375123
										724.245	-0.136522
										755.289	-0.0822165
										782.408	0.0908391
										925.75	0.033365
										635.202	-0.127434
										476.376	0.0351624
										408.082	0.0639149
										646.968	-0.0816058
										409.71	0.0173594
										566.613	0.0744608
										424.806	-0.0490675
										511.657	-0.0138479
										292.773	-0.0318409
										517.838	-0.00147605
										285.712	-0.141787
										105.741	-0.276985
										284.729	0.0036884
										286.193	-0.189581
										237.618	-0.204602
										102.622	-0.0909011
										195.576	0.0240874
										362.715	0.0288414
										47.5	-0.300723
										786.706	-0.127177
										215.671	0.13211
										977.784	0.0129958
										740.95	0.0446604
										739.797	0.0200597
										757.702	-0.0307431
										920.767	-0.0784404
										582.693	-0.157435
										443.759	-0.19998
										442.048	0.0406218
										677.897	-0.0197209
										414.623	-0.0508107
										527.376	-0.0948501
										347.006	0.116738
										455.818	-0.158529
										311.75	0.0147706
										541.739	-0.0483568
										343.193	0.0431978
										212.5	-0.0588396
										178.151	0.0501623
										364.495	0.109012
										343.602	-0.0555067
										129.639	0.0734336
										145	-0.110514
										273.061	0.251676
										124.825	-0.2089
										790.21	0.0421482
										122.544	-0.177801
										283.604	-0.0624909
										313.209	-0.0569121
										137.045	0.0268795
										299.103	0.0121668
										54.8862	0.000140369
										289.709	0.17434
										190.542	-0.0905735
										177.922	-0.0456041
										412.985	0.0096482
										486.216	-0.00066185
										825.428	-0.0373996
										664.798	-0.0496008
										628.908	-0.0696633
										822.23	-0.0514648
										208.824	-0.0597124
										194.396	-0.141039
										51.7806	-0.0275903
										289.267	0.0541955
										240.432	0.11597
										101.122	0.221273
										221.936	-0.0441624
										168.725	0.0428107
										224.783	0.115719
										297.704	0.0815468
										658.763	-0.0128177
										483.323	-0.0274308
										443.099	-0.0713567
										647.562	-0.0300187
										238.812	-0.0700542
										172.663	-0.327444
										271.166	0.127651
										345.579	-0.0127363
										458.394	0.107683
										130.504	0.288147
										349.115	-0.0752347
										371.694	0.0824504
										62.5	-0.0540839
										137.772	-0.123226
										556.715	-0.0859126
										347.032	0.00981379
										287.511	-0.13967
										522.901	-0.112874
										550.091	-0.169317
										485.058	-0.227969
										511.481	0.0485265
										657.519	0.0848998
										691.814	-0.02915
										366.879	0.203473
										647.35	-0.0885128
										532.024	0.0104203
										263.463	-0.00162387
										177.94	-0.0498157
										254.951	0.0150892
										39.5285	-0.22084
										27.9508	-0.243405
										211.32	-0.100918
										796.006	-0.321498
										730.347	-0.334439
										751.041	-0.017718
										903.178	-0.206095
										924.747	0.0728015
										611.249	0.35316
										893.931	-0.128197
										750.417	0.186841
										510.208	-0.0743207
										424.632	-0.183079
										140.801	-0.184321
										218.889	-0.218271
										270.567	-0.26749
										79.4119	-0.454415
										762.238	-0.214817
										695.28	-0.297898
										743.053	-0.0579784
										867.756	-0.107715
										924.184	0.111836
										596.02	0.138398
										869.702	-0.0109996
										761.545	0.282294
										484.346	0.0117342
										400.269	-0.111006
										226.746	-0.104518
										218.195	-0.042778
										248.995	-0.128116
										155.1	-0.220104
										218.418	0.129905
										270.567	-0.075093
										83.1039	0.100408
										106.36	0.0468785
										119.377	0.0560591
										212.265	0.0833838
										214.016	-0.0584986
										266.423	-0.0429335
										332.058	0.0810627
										316.475	0.0615452
										781.045	0.104705
										718.027	0.0913674
										605.516	0.227621
										502.002	0.339216
										548.549	0.148306
										361.568	0.108447
										413.098	0.0414073
										409.575	0.205503
										422.204	-0.0334871
										180.162	0.0279757
										499.03	0.0109585
										127.475	0.109949
										303.16	0.150481
										684.475	0.0680131
										576.91	-0.0353681
										477.821	0.0328412
										177.553	-0.0584004
										153.501	-0.106991
										386.216	0.0892378
										285.843	-0.0753706
										237.263	-0.187546
										133.651	-0.1701
										373.046	0.125414
										75	-0.163648
										489.547	0.0626428
										319.707	0.16004
										653.644	-0.0705636
										652.979	-0.0827446
										555.231	-0.0702229
										221.99	0.0690852
										214.406	-0.0639408
										391.995	-0.019443
										303.201	-0.0355244
										251.063	0.00289512
										119.748	0.0162076
										317.586	0.105923
										112.544	-0.0354525
										424.602	0.0292381
										244.132	0.130673
										578.233	0.0608214
										572.263	0.151235
										473.485	0.0614721
										547.083	0.252316
										573.683	0.00268412
										535.082	0.0424883
										525.862	0.0712726
										492.24	0.063966
										415.587	0.121678
										242.71	0.0161902
										482.131	-0.0492349
										174.589	0.114697
										177.658	0.212789
										384.22	0.217451
										282.234	0.0587616
										177.992	0.177363
										689.841	0.0666202
										713.009	-0.0971768
										682.811	0.0189247
										674.101	0.0772755
										639.424	-0.00645423
										555.366	-0.0584298
										389.834	-0.0579717
										617.136	-0.144012
										302.097	-0.0200528
										317.539	0.0125079
										304.395	0.0917173
										173.241	0.0489824
										120.416	0.0426337

## Sheet: Fig2
Correlation differences between high- and low-spatial-contrast fixations for cell pairs (panel e)
ON parasol		OFF parasol		ON midget		OFF midget		ON vs OFF parasol		ON vs OFF midget
data	LN model	data	LN model	data	LN model	data	LN model	data	LN model	data	LN model
0.0550711	-0.16929	0.0303843	-0.0111668	-0.0247031	0.389631	-0.122647	-0.148446	0.0727758	0.0550283	-0.0959905	-0.0288485
0.131828	-0.042787	0.0267628	-0.0985993	-0.0494219	-0.0491563	0.13859	0.0324821	0.0156318	0.0249003	0.0239587	0.209758
0.0416948	-0.0567877	0.0443954	0.0486961	-0.00817689	-0.0668663	0.0994593	-0.0179681	-0.0138839	-0.0077471	0.0888959	0.126647
0.0889917	0.033806	-0.0599753	-0.208829	-0.0245965	-0.221634	0.0210776	0.00249881	0.190381	0.0292459	-0.0993344	-0.0722389
0.164727	0.103629	-0.0513916	-0.125366	-0.0246402	-0.322758	0.0142113	0.0138643	0.0319814	-0.0169375	0.0114458	0.0471804
0.0481424	0.00740433	0.0520467	-0.0183005	0.0809884	0.0059343	0.0249483	-0.101647	-0.0546012	0.0490249	-0.0336313	0.0283421
0.108629	0.0168683	0.0435323	-0.0165638	-0.023621	0.000495225	-0.0304668	-0.0934205	-0.0186037	0.0769224	-0.152781	-0.155371
0.204421	0.0891989	0.120995	0.103388	-0.0711051	-0.104249	-0.178172	-0.131944	0.169723	0.00367672	0.0109545	0.0524699
0.138492	0.0515121	0.128401	0.00542413	0.000859395	0.00721943	0.11596	-0.0628023	0.0672118	0.109504	0.0112819	0.0658259
0.0523736	-0.0183879	0.0835752	-0.00453957	0.0456463	0.0500873	-0.0689523	-0.0374735	-0.0370815	-0.0110432	-0.0318759	-0.0318937
0.097951	-0.106677	0.127831	-4.32432e-05	0.0611524	-0.0715271	0.0287634	-0.0212004	0.0681161	-0.0206199	-0.0487534	-0.0818091
0.0138467	-0.115962	-0.0513256	0.0573235	0.170412	0.0402213	0.0342355	-0.062634	0.158343	-0.00499541	0.0505682	0.152035
-0.0449826	-0.154868	-0.0948606	-0.20978	0.0122958	-0.0878174	0.00825538	-0.211305	0.0412629	0.122242	0.150489	0.081856
0.0052547	0.0300787	0.0636499	-0.099606	0.00196822	0.0739058	-0.133194	-0.217458	0.0493724	0.0258331	0.0156909	-0.0497305
0.217797	0.0440488	0.077875	-0.00845704	-0.0528594	-0.0760038	-0.0783136	-0.182785	0.112156	0.0399726	-0.169181	-0.0881651
0.0341665	0.0459675	0.0787539	0.123683	0.0250811	-0.0728322	-0.0371439	-0.0798546	0.0239493	-0.0264205	0.0933118	0.205984
0.11789	-0.090515	-0.00447655	-0.099702	-0.136788	-0.150672	0.0216631	-0.0368716	0.00348544	0.196927	0.151344	0.217686
0.0882112	-0.0530661	0.0113238	0.0577559	0.00532684	-0.0499946	-0.0498739	-0.154452	-0.0771973	0.155225	0.0395396	0.137871
-0.0737624	-0.0622518	0.0565282	0.056288	0.138356	0.0591385	-0.0971423	-0.0759533	-0.0686192	-0.119413	-0.0248468	0.167966
0.180075	0.0538565	0.014916	-0.0244778	0.00139178	-0.0947446	0.0081363	0.00738192	0.0920432	0.0973083	-0.0252065	-0.0646805
0.105122	-0.0195588	-0.00362327	-0.0649097	-0.00852902	-0.215725	-0.0694051	-0.12209	0.116729	0.194245	-0.0341343	-0.0324886
0.178444	0.0989306	0.0646791	-0.0635917	-0.13123	-0.151628	0.0127732	-0.0942504	0.0201525	-0.0245564	-0.0209605	-0.101652
0.215448	0.0113364	0.0630098	-0.0625277	0.139701	0.11231	-0.0280468	-0.0585035	-0.0431478	-0.0478319	0.0228221	0.133432
0.0816194	0.037966	0.0159353	-0.0471762	0.267469	0.21333	-0.138575	-0.210638	-0.0168247	-0.0635621	0.0990684	0.0922625
0.195737	-0.0377367	0.00829554	-0.142553	-0.00376285	-0.0516015	-0.0596413	-0.218313	0.00834465	-0.00841297	0.000289038	0.00257215
0.20749	0.10877	0.00780944	-0.124532	0.0431109	-0.065166	0.292209	0.165914	0.132691	0.101446	-0.00772832	0.131155
-0.0257406	-0.105851	0.0282369	-0.0924375	-0.00586075	0.155101	-0.0550175	0.0159411	-0.0210679	-0.136753	-0.0553084	-0.104381
-0.00829233	-0.130701	-0.0464977	-0.0612395	-0.0188609	0.38793	-0.141715	-0.035124	-0.0762473	-0.134626	0.108316	-0.0368308
0.154555	0.0981794	0.0235028	-0.0312157	0.0951279	0.299631	0.0245654	-0.0129545	0.00142685	0.024462	0.0212168	-0.118152
0.0727375	-0.0634228	0.0352827	0.0424291	-0.0109953	-0.135994	-0.0328035	0.0268155	0.223058	0.263515	-0.125513	-0.175273
0.371221	0.122043	0.0881643	-0.0154908	-0.163861	-0.114023	-0.138309	-0.232525	0.0149865	0.0305571	0.0758389	-0.0943206
0.161233	-0.0798027	0.066305	-0.132585	0.0128223	-0.0358986	-0.257748	-0.278572	0.0454729	-0.0158558	-0.0920492	0.0853305
0.171339	-0.0579502	0.110737	-0.0643322	0.0156886	-0.0882856	0.152115	0.123965	0.0205866	0.0548805	-0.0790108	-0.18058
0.174881	0.00421983	0.055967	-0.106876	0.0792622	0.0659702	0.133032	-0.0389137	0.0821542	0.0549678	-0.0238476	0.147607
0.282174	0.246285	0.060522	0.0183137	0.11722	-0.00145955	-0.170034	-0.164582	-0.000693887	0.0897021	-0.145927	-0.00542586
0.0485189	-0.0745484	-0.00755475	-0.105354	0.0946011	0.0942265	-0.170135	-0.133369	0.049643	-0.0690277	0.00173329	-0.0324105
0.19149	0.0674615	0.206444	-0.0978539	0.0327107	-0.0268533	-0.0601851	-0.112445	0.0537281	-0.0397225	0.0258231	0.0700124
0.0566973	0.012076	-0.0400506	-0.0526655	-0.00214395	0.0941445	0.00222252	-0.0520023	-0.0940968	-0.0661358	-0.0354439	-0.0428472
0.0623623	-0.0279464	0.11153	-0.0153836	-0.0650887	-0.064168	-0.151916	-0.161399	-0.0431773	-0.0492532	-0.204882	-0.0115857
-0.0498408	-0.0857469	-0.123106	-0.145124	0.37942	0.331455	-0.0865747	-0.022686	0.0641243	0.041967	-0.0254887	-0.102544
0.0300015	0.0613776	-0.0831591	-0.121573	0.0318565	-0.0845128	0.0260201	0.0727137	0.163192	0.00579277	-0.0241158	0.0680076
0.32786	0.138916	0.0181239	-0.00710009	-0.120353	-0.162309	-0.0917805	-0.0522213	-0.00463729	0.0555095	-0.0993123	-0.100621
0.283974	0.0332687	0.0788093	0.0528262	0.160846	0.154298	0.0298006	-0.0153291	0.0568379	-0.0518724	-0.0194918	0.0461881
0.104891	-0.00186548	0.150462	0.074924	0.0604568	-0.0270909	0.0157134	0.018046	0.141508	0.160796	0.0633163	0.0556663
0.0393665	-0.0103123	0.0398683	-0.131107	0.136293	0.169671	0.112557	-0.0227806	0.0927755	0.0709982	-0.153437	-0.200286
0.167673	-0.061058	-0.103585	-0.0513335	-0.0492418	-0.190353	-0.0118133	-0.205017	-0.0480693	-0.0334049	-0.0252699	0.144439
0.0820716	0.0923831	0.0197602	-0.0918952	0.103096	-0.0429814	-0.0554491	-0.00690377	0.0430261	-0.013472	-0.0662382	-0.0453741
0.0035129	0.0431047	-0.0115368	-0.110232	0.0671097	0.17	-0.0490746	-0.152585	0.0662259	-0.112469	-0.0600105	-0.0177239
0.0807798	0.0625734	-0.0377292	-0.205643	0.0589777	0.0893041	0.069504	-0.0457869	0.047928	0.0520839	-0.0980526	0.00862001
0.227616	-0.069429	-0.0207861	-0.0388178	-0.0224471	-0.209489	0.0457051	-0.189453	0.0313374	-0.00890681	-0.126067	-0.068171
0.284738	-0.0379972	0.140348	-0.0498523	-0.0459786	-0.117237	0.036662	0.0493039	0.00661506	0.115822	-0.0567739	-0.112516
-0.00695746	0.000110045	-0.000128567	0.0354081	0.0187549	-0.146447	-0.0618434	-0.104575	0.0116037	-0.0490101	-0.0218304	-0.00296818
0.0342166	-0.0353707	0.0513066	-0.0613265	0.0211057	-0.205956	-0.0525775	0.0405191	0.111989	0.0976412	-0.0501185	0.134773
0.063916	0.0070723	-0.0171119	-0.0289067	0.0381619	-0.166507	-0.0536328	-0.0665943	-0.0885902	-0.00387928	-0.00780895	0.0448371
0.00273764	-0.0696276	0.0695555	0.0154532	-0.00429789	0.0068981	0.0512533	-0.0144384	0.00302571	0.0295886	-0.0051467	0.219588
0.00625059	-0.162657	-0.123651	-0.198465	0.168506	-0.000402749	0.391442	0.115842	-0.0265728	0.0357453	0.0268482	0.00921901
0.282522	0.0253472	-0.0570827	-0.0858295	0.108876	0.0888071	0.0929293	-0.0256374	0.0770289	0.0992818	0.134135	0.155997
0.176154	0.0882931	-0.0547919	-0.100808	-0.209432	-0.189445	-0.0488598	-0.0887673	0.0822146	0.0272132	0.0355609	0.0462842
0.0530793	0.112964	-0.0423038	-0.200925	-0.21883	-0.257725	-0.060814	-0.0709742	0.161319	0.0721294	0.0542686	-0.048379
0.0979961	-0.0318287	-0.0555769	-0.149363	0.0181389	-0.0336344	-0.206795	-0.00673643	0.15489	0.287948	0.0507824	0.113611
0.071113	-0.0404247	-0.0382766	-0.0391574	0.0309261	0.118774	0.0910173	0.110808	0.0637512	0.160153	0.0618147	0.0845027
0.172277	0.0614517	0.04098	-0.157742	-0.0663051	0.0622798	0.0694098	0.0809482	-0.0117242	-0.0580177	0.0882158	0.113721
0.177415	0.137689	-0.0798185	-0.129123	0.0131901	-0.248141	-0.00245573	-0.126713	0.0807708	0.183272	-0.0246249	0.0357287
0.226774	0.129997	-0.0163493	-0.0285693	-0.0543952	-0.0439793	0.0306422	0.0554686	0.058629	-0.0173581	0.114522	0.0356989
0.234061	0.171241	0.0504769	-0.0262363	-0.0445255	-0.0918951	0.0991403	0.119528	0.0133886	-0.0536468	0.0175426	-0.0982073
0.230141	0.204731	0.0442602	-0.0495209	0.0263258	0.0428478	-0.0641427	-0.00842059	0.0178026	0.0821317	-0.0762011	0.0466768
0.2381	0.238764	0.00276682	0.0185092	-0.0730822	0.0388114	-0.0394095	0.0221392	0.0695582	0.00820302	0.167026	0.211232
-0.0328745	-0.00242634	-0.0190022	-0.148851	0.121119	-0.0903941	-0.169131	0.117699	0.0487235	0.0312998	-0.0681054	0.0114829
0.00313945	-0.0625939	0.383038	0.172679	0.200232	0.0597122	-0.0210041	-0.0668956	0.0322662	0.0388948	-0.0194135	-0.0447836
-0.153794	-0.281972	0.142334	0.02153	-0.0153459	-0.125884	0.101756	-0.0434143	0.149562	-0.00402379	0.0267051	-0.0192303
0.107119	-0.00885694	0.0895527	0.0998685	0.093842	-0.0508162	0.0633443	0.0362638	0.120672	0.0478505	-0.1035	-0.0724089
0.0451495	-0.125717	-0.0376159	-0.118843	-0.114404	0.01379	-0.0260026	-0.0412242	-0.0353796	-0.0263538	-0.0172075	0.0725691
0.152869	-0.0787015	-0.0159093	-0.100491	-0.0177765	0.0873553	-0.0132807	-0.100948	0.119993	0.186241	0.062202	0.099853
-0.13453	-0.0144179	0.106405	0.0975023	-0.00857157	-0.13483	-0.147404	-0.196593	0.167985	0.0592115	-0.0502323	-0.144224
0.000271466	-0.0299265	-0.0458242	0.0480648	-0.0904989	-0.192038	-0.0444721	-0.150856	-0.0243607	-0.0481269	-0.019127	-0.0749958
-0.0789421	-0.17583	0.103894	0.151077	0.119028	0.201666	-0.0317175	-0.0828551	0.0645732	0.070279	0.0413511	0.0855458
0.166565	0.0102803	0.0441393	0.000870541	-0.0337929	-0.0706323	0.00749257	-0.000378421	-0.110039	-0.239585	-0.00912973	-0.0079473
0.172783	0.234521	-0.0207746	-0.134614	-0.0701395	-0.0663179	-0.158654	-0.114168	0.0750807	0.0394084	0.0851661	-0.111648
0.185851	0.118972	0.0863916	0.151098	-0.0472576	-0.0783213	0.0183391	-0.0695081	0.0299025	-0.0144124	-0.0260281	0.043383
0.200109	0.0140322	-0.149535	-0.103687	-0.144688	-0.134422	-0.0417816	-0.0258985	-0.0354143	-0.113398	0.0919527	0.150249
0.123503	-0.0631896	-0.0400415	0.0922347	-0.125274	-0.105204	0.127598	0.144501	0.100139	-0.0235008	0.104675	0.0458675
0.167261	0.109483	0.00755476	0.102205	-0.0175735	-0.0400544	0.0703252	-0.0309285	0.230433	0.215062	-0.00602535	-0.0101693
0.0743145	-0.0985351	0.0647818	-0.0477296	-0.0167185	0.0889901	-0.00539973	-0.123533	0.132353	0.120362	-0.0161083	0.0016298
0.0928774	0.104614	0.126123	0.169469	-0.0587621	-0.0347359	-0.078061	-0.14489	-0.007239	-0.0349555	-0.0172496	0.00504129
0.156503	-0.0598379	-0.0890274	-0.145605	-0.291648	-0.335621	-0.137176	-0.239279	0.0201375	-0.0210731	-0.0268537	-0.0891104
0.165259	0.100113	0.179241	0.028266	-0.0522632	-0.0132859	-0.0171482	0.0183984	-0.0803877	-0.0743789	0.0656608	-0.0135628
0.167578	0.136318	-0.0315324	-0.0792643	0.0959272	0.114974	-0.0292196	0.0134682	0.0212377	0.0221938	-0.0517444	-0.0132193
0.22825	0.236476	0.0194181	0.0642935	-0.0417667	-0.0287516	0.00481121	-0.0740814	-0.00402342	-0.00639788	0.0277481	0.0380299
0.109309	0.0150182	0.105184	-0.0502495	-0.00612501	-0.0159019	-0.0472838	-0.157359	0.071566	-0.0272029	-0.0162366	-0.0484147
0.250795	0.133653	0.121857	0.00245485	-0.0894922	-0.00478628	0.0802811	0.0165429	0.0753957	0.138983	0.0209379	0.0994641
0.0779052	-0.00882813	0.158335	-0.022937	0.105381	0.0186523	-0.0954069	-0.0759051	0.0303537	0.0380229	0.0871559	0.105465
0.0198257	-0.168043	0.0154959	-0.142214	-0.0417516	0.0818325	0.0363913	0.0420989	-0.0715944	-0.0839961	0.0823462	-0.0569555
0.0857228	0.0639612	-0.0170481	-0.148213	-0.0753203	-0.163308	-0.0774643	0.0236512	0.0409165	-0.0315503	0.041141	0.0143275
0.0893509	-0.0955173	0.0113466	-0.130653	-0.0764498	0.0158185	0.143642	-0.0441438	0.0331002	0.0282581	0.134071	0.0792744
0.195291	0.211775	0.0434664	0.123769	0.0677205	0.111611	-0.0737845	-0.143445	-0.00204059	-0.048669	0.128292	0.131984
-0.00746561	0.0813488	0.00580525	-0.0159831	0.115215	-0.0548364	0.0769679	0.0441589	0.138981	0.135609	0.0431351	-0.146589
0.014832	0.0319701	0.0623369	-0.0187283	-0.0777591	-0.282134	-0.0554383	-0.0598664	-0.0651901	-0.0102835	0.0504147	0.113992
0.143667	0.0605183	0.000986978	-0.0314827	-0.0221829	-0.0520469	-0.064183	-0.118597	-0.0507137	-0.0638052	-0.0432582	-0.0483885
0.0405327	-0.195846	0.22655	0.0860043	0.0679264	0.0181628	0.111839	0.0126051	0.041446	-0.0757462	-0.0654281	-0.110833
0.261158	0.292228	0.0679209	0.122967	-0.0201543	-0.0747661	0.0182593	0.0285023	0.069795	0.0516794	0.0151312	-0.0118724
-0.0539358	-0.0382684	-8.72314e-05	0.131958	-0.0439932	-0.114374	-0.0380292	0.0469439	0.040332	-0.0142737	-0.0360838	-0.0913459
0.249439	0.133904	0.0715992	-0.0105213	-0.152634	-0.204392	0.136465	-0.0407483	0.0584309	-0.0403511	-0.0907985	-0.0471663
0.165002	0.253021	0.195719	0.130901	0.0418064	-0.143828	0.112548	0.0857169	0.0343145	-0.0367862	-0.063107	0.0150983
0.0879532	0.0552785	0.171594	0.153484	-0.0202523	0.0207805	0.0956422	0.0505462	0.119703	0.0479219	-0.00836984	-0.0308075
0.126811	0.211861	0.125258	0.0435373	0.0254895	0.123006	0.13487	0.12998	0.0567425	0.110872	0.055023	0.071425
-0.0278988	-0.104103	0.236077	0.183193	-0.227512	-0.276042	0.0120106	-0.0472546	0.0452523	0.0631785	0.0196806	0.119613
-0.057657	-0.038216	-0.0330926	-0.0219482	-0.0516991	0.00512658	0.183444	0.217251	0.025067	-0.00546474	0.0322075	0.0330534
0.116757	0.0780133	0.0972257	0.0876419	0.0487897	-0.0507818	-0.00142176	-0.0712717	-0.129461	-0.0131748	-0.0290538	-0.00792377
0.0102358	0.0577556	-0.0225195	-0.0856294	-0.013537	-0.0562063	0.0207474	-0.038422	0.00494479	0.0083411	-0.0239547	0.0284318
-0.0197967	-0.0020666	0.0959741	0.0630654	-0.0330689	0.0404211	-0.0513056	-0.121078	-0.0885743	-0.0669143	-0.0940788	-0.033909
0.0103885	0.10533	0.076183	0.0752721	0.0621923	-0.013479	-0.00667928	0.123242	0.089508	0.0545465	0.110635	0.142196
0.226365	0.281849	0.14845	-0.110586	0.0383874	-0.0291493	-0.0783689	-0.0321504	-0.0445909	0.0341546	0.101011	0.0827115
-0.0460732	-0.134365	0.061253	-0.0177113	-0.050748	-0.0869211	0.0487724	0.0232316	0.01692	-0.0880632	0.15978	0.122113
-0.205884	-0.142426	0.107777	0.0428635	0.159003	0.218686	-0.0322763	0.0883178	0.00611281	-0.00380871	0.0206811	-0.0641092
-0.0209026	-0.0616944	-0.031272	0.0465172	-0.0451091	-0.025839	0.170456	-0.0706593	0.0939397	0.146195	-0.0501319	-0.0595481
0.0270644	-0.0806118	0.104929	0.0467696	-0.0713086	-0.163038	-0.0858011	-0.219605	0.0593727	0.0757507	-0.000535011	0.0116218
0.23967	0.230539	0.0788252	0.031996	0.183373	0.00710987	-0.0441847	-0.0873174	0.0182985	0.149755	0.104936	0.0751381
0.235452	0.349724	0.00727018	0.0140958	0.0460843	0.0847362	0.0114621	-0.0752322	0.0352308	0.0369471	0.0232985	0.0863775
0.241979	0.080442	0.124486	-0.109051	0.14443	0.0392836	-0.0475696	-0.080572	0.052444	0.00984905	-0.150363	0.00377619
0.110467	0.102668	0.273792	0.20953	0.011803	-0.114271	0.0229616	0.0861115	-0.00807924	-0.109902	0.0382422	0.00931667
0.0688519	-0.151732	0.0959583	0.0129139	0.144534	0.0194418	0.00585507	-0.0914133	0.021487	0.0803965	0.0191169	0.00839289
0.19192	0.228301	-0.0537522	-0.0541581	0.0501935	0.0614691	0.0128236	-0.164163	0.0488946	0.0721691	0.0493435	0.0623458
0.0510919	0.0679449	-0.0298774	-0.0896211	-0.105278	-0.170428	-0.0971123	-0.281305	-0.0303819	-0.00691574	0.106027	0.0880875
0.0372391	0.0549102	-0.108306	-0.0971461	0.0891208	0.0738957	-0.0115011	-0.0332677	0.0630507	-0.000716832	-0.00875541	0.0459283
-0.0418655	-0.0829744	-0.00780633	-0.0315821	0.0571786	0.0242474	-0.038531	0.0529859	0.0515643	0.0443498	-0.0211648	-0.0486686
0.351435	0.202313	-0.00602114	-0.131585	-0.00498577	0.143359	-0.16885	-0.198958	0.0472638	-0.0018533	-0.0466435	-0.0774844
0.122505	0.2521	-0.0513956	-0.0454443	0.176856	-0.0955546	-0.0351727	-0.125079	0.0831597	-0.0393738	-0.0186883	-0.0196925
0.092613	0.120862	0.0892821	0.0307686	0.069842	-0.17405	-0.0947149	-0.123669	0.127605	0.134333	-0.100471	0.0448179
0.181604	0.181939	-0.00515574	-0.201036	0.145653	-0.118069	-0.277242	-0.197154	-0.10321	-0.0772383	-0.132417	-0.156954
-0.0190981	0.0894713	0.0559315	0.0928643	0.148123	-0.0829933	0.0182026	-0.0773915	-0.0460064	-0.0739567	-0.0141707	0.0801441
0.447725	0.283338	0.0935479	0.0363511	0.114359	0.0484405	0.168615	0.0630386	0.0276209	-0.0275741	-0.0495579	0.0465372
0.158416	-0.0119412	0.0405945	0.0342473	0.060986	0.067492	0.102275	-0.0648551	-0.0369091	-0.055516	0.0698662	0.125842
0.304053	0.227158	0.00642757	-0.0353182	0.0618621	-0.0338834	0.121775	-0.0790868	-0.101833	-0.160601	0.0454496	0.0148911
0.0435702	-0.0095371	-0.0201045	-0.155749	0.0620763	-0.0586158	-0.010979	-0.00186408	0.0337445	-0.0141643	0.0621338	-0.0161088
0.207005	0.104755	-0.0129702	0.0525626	0.0902918	0.0357809	0.0548595	-0.0293564	0.108282	0.00620916	-0.0637083	-0.051672
0.158445	0.0759155	-0.00162899	-0.0828156	0.202316	0.0109128	-0.0223781	0.041632	0.0550702	0.0293749	-0.214487	-0.125418
0.102576	0.107173	0.00700024	-0.135178	-0.0289072	-0.0628946	0.0066331	0.000123259	0.083285	0.000300921	-0.0940716	0.0727162
-0.0166173	-0.0735382	0.0449271	0.0203096	0.0603866	0.061776	0.0922645	-0.135573	0.091281	-0.00779927	0.114746	-0.0257497
-0.0370472	0.0534185	0.00376741	0.021725	0.0597177	0.0069226	0.154863	-0.027895	0.0723171	0.0317179	0.115657	0.142384
-0.0232467	0.0307528	0.0244877	-0.099643	-0.035389	-0.0624626	0.127009	0.0111121	0.0185876	-0.0383294	0.0388158	0.114135
0.00905575	-0.0284208	0.0874541	0.0226268	0.103138	-0.0279707	0.0274103	-0.0109046	0.117367	0.171077	-0.0397605	0.0397646
-0.0553787	-0.188103	0.0911327	0.11016	0.0314221	0.106929	-0.0275383	-0.078534	0.102051	0.0582298	0.049241	0.096154
0.0900419	0.107519	0.0363616	0.0631164	-0.0492284	-0.108187	0.0235209	-0.000521749	-0.0103233	0.013373	-0.0867104	0.066408
0.133267	0.141818	0.109957	0.159004	-0.0826577	-0.133841	-0.138013	-0.0334501	0.1309	0.0822202	-0.0504437	-0.0386446
0.0980163	0.230818	-0.100821	-0.096506	0.0762297	-0.129012	-0.0885931	-0.100264	0.0235236	-0.0262925	-0.0716192	0.0966691
0.0516619	-0.0065988	-0.0188511	-0.0746648	0.122796	0.109744	0.0972127	0.036234	-0.00987585	-0.0544603	-0.166981	-0.0760514
-0.0153494	-0.11805	0.00172721	0.0103981	-0.13404	-0.199675	-0.0715683	0.0930388	0.0719642	0.0928692	-0.0470927	-0.0458534
-0.0056158	0.0386314	-0.0167723	-0.0928296	0.102033	0.0400761	-0.056536	-0.047876	0.0138318	-0.0273459	-0.0747064	-0.0130845
0.0523178	0.00825424	-0.000760348	-0.10306	-0.035685	-0.0130444	-0.0370192	-0.0323341	-0.158553	-0.177411	-0.0789222	-0.0218084
0.0627303	-0.0307856	0.00118943	0.0183424	-0.102369	-0.245987	0.0556111	-0.0541998	0.0257771	-0.104002	0.102609	-0.0182597
-0.019267	-0.0598999	-0.159639	-0.342724	-0.0959575	-0.0225946	0.0759049	0.154394	0.012522	-0.0315694	0.044238	0.0755512
0.0953636	0.0599641	0.145527	-0.0190861	-0.0354655	-0.0467637	-0.053678	0.014721	0.00299165	0.00578501	-0.0472897	-0.0649539
0.132733	0.188436	-0.15725	-0.188558	-0.101792	-0.127783	-0.0519067	-0.0564244	0.0272097	0.00121356	-0.173514	-0.119311
-0.0192189	-0.11784	0.0325687	-0.0752054	0.0627964	0.0724515	0.0617431	-0.117655	0.240404	0.188818	-0.103208	0.0637605
-0.0796662	-0.16218	-0.0627434	-0.0940517	-0.113948	-0.0218098	-0.106812	-0.167272	0.0895068	-0.0532641	-0.130745	-0.125178
0.182653	0.155192	-0.031256	-0.117388	-0.054046	0.0103452	-0.0463943	-0.227685	-0.0678636	-0.0823365	-0.0568836	0.124518
0.104544	0.285532	0.0878816	-0.0516863	-0.0615791	-0.0796241	0.0521359	0.0859804	-0.220669	-0.203732	-0.0557421	-0.0458756
-0.123115	-0.234904	-0.00111147	-0.14378	0.313823	0.116838	-0.22407	-0.200125	0.00212527	-0.031198	-0.0109704	0.0722834
0.00422226	-0.0666322	-0.0228821	-0.00874759	0.0302561	0.153166	-0.0848535	-0.0653442	-0.0459363	-0.045815	-0.0247319	-0.155412
0.13403	0.237247	0.00813597	-0.0610276	-0.0201352	-0.0311747	-0.0549061	-0.277845	-0.0491031	-0.000149511	0.197208	0.182752
0.0277553	0.0938904	-0.0392992	-0.0259892	-0.00893528	0.130516	-0.121326	-0.0712697	0.0174097	-0.0146721	-0.134808	-0.0530118
0.0536921	0.059674	-0.011954	-0.01978	-0.0444164	-0.00983144	-0.02389	-0.242349	-0.012298	-0.0968802	0.0824072	0.143023
-0.0438431	-0.0102064	-0.0655221	-0.0566588	0.0805742	0.0630037	-0.0420532	-0.0451246	0.107708	-0.013253	-0.00611026	-0.0327007
0.194991	0.183822	-0.0841177	-0.146784	-0.0187541	-0.105605	-0.0766663	-0.0610486	-0.030582	-0.00937435	-0.0275941	0.0670439
0.170957	-0.0831844	0.0110349	-0.0714662	0.163203	0.0913667	-0.192351	-0.260607	-0.0147493	0.0403019	0.0123726	0.10211
0.0363568	0.0523688	-0.0378666	-0.119485	-0.0994776	-0.0262619	0.0569321	0.0136051	0.22371	0.295757	-0.0063354	-0.000672568
-0.0200245	-0.09699	-0.0564382	-0.0678382	0.159043	-0.0593763	-0.11333	-0.0805662	0.0177884	0.103567	0.0151464	0.0632047
0.0693225	0.0713571	-0.0547366	-0.0694929	0.0829176	-0.0255384	-0.0963641	0.00623587	-0.0322814	-0.0296795	0.0769046	0.0262823
0.0985707	0.13794	0.1071	0.0698372	0.0201397	-0.00263354	-0.144757	-0.0618758	-0.178903	-0.173328	0.00640527	0.0129814
0.12313	0.0416235	-0.0509946	-0.0122426	0.16091	0.0642557	0.0607847	-0.034192	0.00443731	0.0153462	0.0887177	0.201134
0.0367313	-0.0521986	0.14015	0.128715	0.140995	0.101123	0.0608719	-0.136973	-0.0169757	-0.00307171	-0.0198296	-0.0468707
0.00412205	-0.0271105	-0.114482	-0.22826	-0.0610461	0.158991	-0.00676621	0.131669	-0.0160858	-0.0453618	0.0162122	0.0378513
0.0611001	-0.00318144	-0.185016	-0.261744	0.0829714	0.142084	0.11068	0.0593243	0.00481629	0.0273369	0.0929778	0.0279952
0.209919	0.235349	-0.0595319	-0.128876	0.20785	0.212051	-0.0433921	-0.188626	0.0414374	-0.00450134	0.0351986	-0.0176628
-0.0141233	0.000149146	-0.0669826	-0.120163	-0.0902366	-0.0430531	0.00105761	-0.0841708	0.0201404	-0.074491	0.087533	0.238158
0.048013	0.0732841	0.0244163	0.0329034	0.0386127	0.0338029	0.0168127	0.032517	-0.0651125	-0.0510908	0.137871	0.113138
0.0720534	0.0809069			0.0795032	-0.0469671	0.0167424	-0.0677503	-0.0248972	-0.126544	-0.00225894	0.0356886
0.0536427	0.0886921			0.150802	0.252566	-0.168831	-0.0818226	0.0960912	0.0164407	0.0182339	-0.0704927
0.00887481	0.0373431			0.291096	0.0822273	-0.0917188	-0.124651	0.0271266	-0.0744185	0.00681156	0.0111078
-0.0264543	-0.0867758			-0.0860995	-0.00397289	-0.204286	-0.088356	0.0191549	-0.0646695	0.0890761	0.151114
-0.0217505	-0.0293384			-0.0789148	-0.152409	-0.0600432	0.0412011	-0.0334844	-0.151628	-0.0251596	0.0579719
0.0453024	-0.0443179			0.0584853	-0.0543624	-0.131447	-0.135666	-0.0408457	-0.0654294	0.0702183	-0.0187227
0.0898465	-0.0570184			0.0695986	-0.118792	-0.126975	-0.146779	-0.00908617	0.0451942	0.180042	0.103343
-0.0588106	-0.139463			0.115743	-0.0113331	-0.00412971	-0.0765468	-0.0487819	-0.0227186	0.00749223	0.0280649
-0.0671116	-0.164163			0.0878819	0.0527099	0.0622803	-0.0825978	-0.0820809	-0.0945699	-0.0586787	-0.115456
0.00828911	0.0705367			0.0792804	0.148185	-0.00111512	0.030902	0.0418606	-0.0756764	-0.00808514	-0.0188331
0.0374403	-0.108747			0.115457	-0.13574	-0.164281	-0.123857	0.0118249	-0.00770032	0.0534111	0.0494488
0.191698	0.0773534			-0.0659219	-0.102107	-0.140567	-0.182168	-0.0325815	-0.0473191	-0.11695	0.00409647
0.0620689	0.0270542			0.228252	-0.00521534	-0.0426168	-0.0219952	0.102018	0.0266381	-0.0495769	-0.0538138
0.113452	0.0635718			0.00405939	0.0193966	0.0323007	-0.236959	0.105919	0.0977461	-0.0960297	0.00440125
-0.0248079	-0.11792			0.0197547	-0.0528603	-0.0707924	-0.0636813	-0.00576447	0.00246109	0.00841181	0.0650934
0.144976	0.0738506			0.0868851	0.0799059	0.0167478	-0.0470914	0.00172521	-0.0655732	-0.121889	-0.0648163
-0.205997	-0.117527			0.0272269	-0.0852926	-0.368264	0.00745001	-0.0202478	-0.16967	-0.166875	-0.0789459
0.283876	0.212262			0.0177777	0.0361322	-0.147102	-0.0166976	0.0066319	0.0318205	-0.0486407	0.0262088
0.139127	0.0166267			-0.0236175	0.104527	-0.150483	-0.165943	0.0424954	0.0209794	-0.178407	0.00802964
0.164428	0.0854558			0.0236072	-0.0259152	-0.00487859	-0.141494	0.0687185	-0.100113	-0.168805	-0.0747614
-0.0809215	-0.0932195			-0.113472	-0.0625844	-0.0395423	-0.0431563	0.0553393	0.0692006	-0.0525305	-0.00402732
0.130462	-0.0243728			0.118422	0.00797981	0.141608	0.0373724	0.130374	0.00163899	-0.0912848	-0.0264873
0.147025	0.178794			-0.0323202	-0.148029	0.0649001	-0.1706	0.0288953	-0.0181965	-0.088373	-0.0696238
0.104616	0.0296069			0.0449185	-0.0254222	-0.164127	0.0110697	0.05612	0.0576547	-0.0318483	-0.0569304
0.168739	-0.0385887			-0.0907817	-0.266502	0.137009	-0.085034	-0.0248599	-0.0660522	0.120434	0.242775
0.219231	0.0631326			0.0956978	0.0543948	0.0205722	-0.082874	-0.00775955	0.0149202	-0.0460885	0.0971078
0.0193239	-0.0283979			-0.0664034	0.0567969	-0.0833215	-0.00493483	0.0880654	-0.0228319	-0.0160836	-0.0538636
0.184374	0.00365433			0.140911	-0.0486789	0.0853043	0.0812097	0.0567744	-0.0253283	-0.045251	-0.0254972
0.259706	0.208355			0.0637804	0.0591077	0.107012	-0.0634167	0.0484721	-0.0140835	-0.0763531	0.0876872
0.104917	0.238141			0.198302	0.158465	-0.0260155	0.0112617	0.0386079	0.0276147	0.0270451	-0.131057
0.13856	0.154711			0.101799	-0.0725708	-0.182774	-0.221109	0.0584591	0.0686317	0.0772769	0.0166747
0.0226469	-0.0294854			0.224099	0.228123	0.0351611	-0.00368196	-0.0706419	-0.0373008	-0.116406	-0.0121431
0.0934011	-0.0445737			0.175925	0.0119423	-0.125923	-0.0119665	-0.0207994	0.0492648	0.0432286	0.22683
0.109277	-0.00925621			0.172823	0.172552	-0.0395756	0.0415044	0.0902509	0.0171002	0.0726815	0.0457125
0.134722	0.129907			0.122597	0.0102918	-0.010344	0.0778192	0.0704549	-0.0476503	0.0123323	0.142059
0.100877	-0.0730105			0.0283682	-0.148606	0.0773736	0.0730149	-0.00568295	0.0443001	-0.129727	-0.0787591
0.124807	0.158829			0.0973031	0.0902919	-0.0871061	-0.100315	9.46224e-05	0.00832243	0.0148227	0.0835607
-0.0645975	-0.0779423			0.129988	0.0475524	-0.0970142	-0.0813859	0.0333551	0.00293546	0.0185177	-0.015684
0.353942	0.175696			0.0740508	0.152535	-0.0751069	-0.033446	0.036717	0.0450806	-0.0658166	-0.0583151
0.195517	0.111446			-0.0223181	-0.0168271	0.0561664	-0.0653545	-0.0111335	0.0510796	-0.0706362	-0.0877149
-0.00604704	0.0341281			-0.0222116	-0.0117927	0.0556776	0.0753722	0.0247932	0.0269136	0.0114176	0.0439461
-0.0161146	-0.173355			0.0166119	0.0552895	-0.0170512	0.0433278	0.0496785	0.00864524	-0.0575933	0.0164849
0.117682	-0.0180523			0.121847	0.0667273	0.111163	0.0337915	0.13613	0.0720876	-0.0348258	0.0224889
0.0817701	0.12765			0.0270915	-0.0185304	0.17669	-0.0155989	-0.139308	-0.167167	-0.0445232	-0.0616123
-0.0292959	-0.0503236			0.160534	-0.0473308	0.0496333	0.0433219	0.0623703	0.072191	-0.109395	-0.0610551
0.062114	0.0843414			0.00793357	0.0656554	0.00153133	-0.108348	0.156338	0.0603887	-0.00045148	-0.0460401
0.148935	0.057205			0.0323528	0.0469184	-0.0291695	0.00713249	0.100566	0.00840377	-0.112705	-0.119214
0.200144	0.103814			0.127505	0.121124	-0.133037	-0.0990222	-0.203063	-0.183622	-0.0940644	-0.0822222
0.0566271	0.0211555			-0.0110577	-0.143431	0.139911	0.110872	0.0492666	0.0335906	0.0394501	0.0524758
0.118569	0.0685729			0.191931	0.136318	0.0203331	-0.0790838	0.11811	0.0684227	-0.0599068	-0.0143537
-0.162553	-0.106083			-0.015558	-0.0511977	-0.148154	-0.104062	-0.0245216	-0.0210499	0.0160698	-0.0319058
0.0160293	-0.150211			0.0737378	0.0228729	-5.01126e-05	-0.0852406	-0.0341195	-0.0306513	-0.0269132	-0.0876684
0.0515427	0.0408951			0.0571247	0.118439	0.0303579	-0.024072	0.0185782	0.0567766	0.107346	0.0293058
0.070661	0.0681423			0.0722841	-0.0457775	0.0957652	0.0235977	-0.0155182	-0.0193959	0.0511334	0.108411
0.0621894	0.223215			-0.00494501	-0.0539231	-0.00080204	-0.00357834	0.0316928	0.00425556	0.0400429	0.0958901
0.0275358	0.00988986			0.231299	0.195915	0.013033	-0.058852	-0.00268427	-0.00846389	0.012777	0.0574289
0.244119	0.112996			0.00915253	-0.0392674	0.0786703	-0.0346981	0.0583363	0.00521054	0.109633	0.0148734
0.0133275	0.0231557			0.15459	-0.00535727	0.0544141	-0.0142923	0.0381689	0.0106963	-0.0593082	-0.0839277
0.0228456	-0.0630305			0.119719	0.147459	-0.0704403	-0.125025	0.0269148	0.0404662	0.0469417	0.131708
-0.0619373	-0.0532574			0.0754472	0.073907	-0.0419825	-0.0662744	0.0256611	0.0995267	-0.0332151	0.0104081
0.0514776	0.0474366			0.0539696	0.0829136	-0.042362	0.0282292	0.102427	0.0877128	0.00902454	0.103723
0.10145	0.106893			-0.0144006	0.00610073	-0.0374169	-0.0969993	0.0491193	0.065748	0.16516	0.187403
-0.00298399	-0.132801			-0.0299629	-0.124736	0.0820687	0.0193346	-0.0915636	-0.160557	0.0878863	0.0567781
0.0996764	-0.00535806			0.0156728	0.0461707	0.0349809	-0.0538356	-0.0465045	-0.0400113	-0.00717972	-0.0169407
0.337673	0.210014			0.20066	0.118938	-0.150364	-0.157616	0.111985	0.0586333	0.0990986	0.0441438
0.0138056	0.0216157			0.0107846	-0.0288461	-0.0125039	-0.127358	0.0128962	0.00465113	0.0262569	0.0720079
-0.079243	-0.116996			-0.044266	-0.131221	-0.0259633	-0.0560617	0.0147123	-0.0551751	0.0286376	0.105154
0.117872	0.119746			0.0372839	0.0466124	0.0183642	0.00255948	0.0545981	0.0516385	0.146374	0.133456
-0.0303693	-0.0171739			0.0200469	0.0349875	0.0124042	-0.0151257	0.129156	0.139821	0.0309213	-0.0742948
-0.0998145	-0.180344			0.0779829	-0.0030735	-0.0112547	-0.0305518	0.0769554	0.0245982	0.0389177	0.0223645
0.0545892	0.142484			0.0551281	0.127167	-0.0464993	-0.119038	0.155433	0.0786942	-0.0136122	0.0171391
0.0677088	0.0720446			0.207213	0.117067	-0.0903547	-0.263376	-0.052832	-0.105902	0.0525955	0.00929134
0.0108725	0.00418057			0.40926	0.211121	-0.0728782	-0.220754	0.0449682	0.0210368	-0.0842595	0.000746071
0.0688727	-0.00215466			0.033216	-0.0460587	-0.0912819	-0.0981625	0.124005	0.115589	-0.0544953	0.0790081
-0.0713101	-0.0658937			0.0228542	-0.258718	-0.0019943	-0.143836	0.0465861	0.0106258	-0.0687404	0.123495
-0.00643787	-0.0130972			0.0552286	-0.0932936	0.0980041	-0.0705682	-0.0651609	-0.0887045	-0.0765316	0.0473137
-0.157314	-0.276113			0.131622	-0.281533	-0.0641341	-0.182069	-0.0434046	-0.073667	0.102627	0.192035
0.0520844	-0.154771			-0.0141931	-0.121032	-0.0070672	-0.23776	-0.00124436	0.0171485	-0.0335651	0.0307296
-0.0147196	-0.0916086			-0.04928	-0.0469449	0.10677	-0.183629	-0.0275146	-0.0870106	0.0601501	0.0770142
0.14124	-0.00380713			0.0449462	-0.083509	0.155316	-0.0409836	-0.0433903	-0.0715046	0.0561575	0.0509438
0.138454	0.167203			0.102909	-0.22931	-0.00403383	-0.0260331	0.0351466	0.0554355	0.0684184	0.0606737
0.0793404	-0.0477463			0.0863415	-0.0570824	-0.0964548	0.00780942	0.00510909	-0.125533	-0.0265306	-0.0975011
0.144807	-0.0298414			-0.0198251	-0.148651	0.230666	-0.0584859	0.0625466	0.077871	0.0429276	0.0849582
-0.0782259	0.00712913			0.0610163	0.10541	-0.0891009	-0.177864	-0.0445603	-0.0780918	0.183791	0.026794
0.302124	0.157083			0.00713987	0.182613	0.0256163	0.057356	0.110086	0.171475	0.145573	0.133239
0.0461033	0.0493964			-0.0134211	-0.0670061	0.00420842	-0.00526425	0.0527322	0.00527692	0.0222591	0.162644
-0.0207088	-0.0754292			0.0623037	0.0319723	-0.210233	-0.205785	-0.00571467	-0.0545783	-0.101881	0.00355188
0.234906	0.334032			0.0252955	0.131365	-0.193059	-0.127131	-0.0663016	-0.0907009	-0.0283615	0.142495
0.0907146	0.206124			0.276656	0.110305	-0.117812	-0.129273	0.0183805	-0.0204889	0.170476	0.114675
0.0524808	0.0714535			0.00255235	0.0129838	0.0514061	-0.0774103	-0.00538066	-0.0139225	-0.0848694	-0.0656225
0.23025	0.233078			0.0601196	0.0671103	-0.0682144	-0.0201152	-0.0844675	-0.123511	-0.0731275	0.0144952
0.01081	-0.0803909			0.233685	0.103697	0.0078365	0.0930792	-0.03695	-0.0772636	-0.125528	-0.0147192
0.0255673	0.0118042			-0.0665233	-0.159381	-0.0156684	0.0208838	0.0142166	0.0278274	-0.0502983	0.0708813
				0.232567	-0.0934304	0.0453975	-0.0681061	0.0424381	-0.0150467	0.0149536	0.0228216
				-0.101149	-0.167633	0.01138	-0.0879313	0.0567897	0.0406194	0.00594285	-0.0784052
				0.0583677	-0.158961	0.0867628	-0.0122992	-0.00928679	-0.0328463	-0.0316341	-0.126445
				0.264012	0.252413	-0.158188	-0.201784	0.0270684	0.00549393	0.000134952	-0.0245996
				-0.0183854	-0.0954799	-0.239447	-0.250633	0.0168138	-0.082341	-0.00622714	-0.0704316
				0.0698136	0.026989	-0.139439	-0.0700723	-0.00892012	0.0221375	-0.149844	-0.0840695
				0.0877598	0.13576	-0.0317381	-0.0420923	0.0282916	-0.00619331	-0.164008	0.0811938
				0.0322055	0.120941	0.0229618	-0.127969	0.0153044	-0.0650962	0.0368629	-0.0683214
				-0.0674252	0.0830315	-0.0879532	-0.152552	0.0749116	0.11044	-0.0891032	-0.0242528
				0.0885572	0.0085703	-0.171353	-0.125602	0.167442	0.174139	0.0617254	-0.00487936
				0.166769	-0.0457784	-0.0182059	-0.0943414	-0.00415992	0.0380317	-0.0203021	-0.0385013
				0.0589918	0.0135315	0.014514	0.0126002	-0.0059655	-0.0376246	0.0007005	0.0104645
				0.103838	-0.0940209	0.113636	0.0961349	0.159367	0.172554	0.00619249	0.00828409
				0.273298	0.0190695	-0.123287	-0.127386	0.0831615	0.0769131	-0.0472575	-0.0575968
				-0.118117	-0.0643676	-0.108701	-0.149625	-0.0744945	-0.136485	-0.0153433	-0.1328
				-0.0843828	-0.0371355	0.083187	-0.00157198	0.0640242	-0.0457338	0.118924	0.127771
				0.154006	0.198366	0.134851	0.0631351	-0.0156011	-0.0202762	-0.0228135	0.0503921
				0.25556	0.19034	-0.140397	-0.184759	-0.0599241	-0.0441214	-0.101577	-0.0270515
				0.0378208	-0.117343	0.146971	-0.0274775	-0.00577161	0.00795332	-0.0108622	0.0972553
				-0.127829	-0.143603	0.0577128	-0.0512656	-0.00458571	-0.0797679	-0.151788	0.0560952
				0.00078515	-0.207318	0.068045	0.0122511	-0.077398	-0.0834185	-0.0158216	0.00549475
				-0.145341	-0.255158	0.0513411	-0.0885775	0.0326113	0.054508	-0.0764825	0.0540637
				0.0226892	-0.0423231	0.0661034	-0.136985	-0.0785023	-0.0514726	0.000205003	0.0870108
				0.133453	0.0542934	0.0205343	0.115268	0.00779205	0.0319944	-0.0132489	-0.057237
				-0.0748827	-0.14285	0.00406215	-0.0310839	0.0331359	0.0833685	-0.0490792	0.000779748
				-0.105765	0.130987	0.0934014	0.0808281	-0.00587832	0.154903	0.135639	0.0718665
				-0.00876647	-0.0417338	0.0531786	0.195651	0.0625617	0.0620549	0.0183623	-0.017709
				-0.0423543	0.0423073	0.09814	0.08025	0.0613538	-0.0533414	-0.0628496	-0.0608156
				0.18657	-0.0442585	-0.122136	-0.166565	0.0594065	0.0992716	0.110502	-0.0346664
				0.0408599	-0.243243	-0.0262671	-0.11891	0.034552	-0.00437247	0.105449	0.179221
				0.15789	0.118848	0.0238634	-0.0313907	0.0987589	0.11417	0.0166456	0.0884783
				0.102346	0.211604	0.0768305	0.00362195	0.011479	-0.016391	0.0480306	0.11828
				-0.0158162	-0.269562	-0.0193953	-0.0863637	-0.004223	0.0377096	0.103164	0.168162
				0.229956	0.0838473	0.0927978	0.111183	0.0374733	0.102947	0.0866872	0.0571411
				-0.141386	-0.160379	-0.0720348	-0.0251708	0.0898981	0.155092	-0.00836347	0.00414752
				-0.019092	-0.266946	-0.120197	-0.0911657	0.1322	-0.105742	0.0756236	0.12279
				0.314939	0.20052	0.0450908	0.0702574	0.0421728	0.0854596	0.0351734	0.111767
				-0.0439275	-0.187859	0.0132606	-0.0589611	0.102285	0.0626792	-0.0591543	-0.00520633
				0.176299	-0.181558	-0.147432	-0.148603	0.0906529	0.138636	-0.130792	-0.136383
				0.119931	0.00801115	0.0301591	0.0186122	0.03542	0.05197	-0.0276742	-0.0461815
				0.163115	0.0149345	0.00095924	0.0160002	0.109342	0.0495808	-0.105944	-0.00643542
				-0.0415034	0.0851877	-0.0350691	-0.0243827	0.0931385	0.153097	-0.0248737	0.0150491
				0.0180921	-0.0732704	0.228926	-0.0995398	0.0677023	0.0588165	-0.093668	-0.0681699
				0.237706	-0.0556765	-0.0220806	-0.0288322	-0.116634	-0.0108639	0.0822451	0.0653819
				-0.0571195	-0.126068	0.0814467	0.0819892	-0.0787348	-0.0530276	-0.0332932	-0.031926
				0.0161678	-0.0621913	-0.0220086	0.0275579	-0.000631638	0.104975	-0.0325024	-0.0404577
				-0.0393227	0.0809677	0.0511351	-0.0594888	0.0403066	-0.153696	-0.112799	0.0373442
				-0.00471499	-0.0644765	0.0120432	0.00750041	0.0313197	0.152407	-0.0752754	0.0327697
				0.132347	0.154661	0.0959143	0.183416	-0.00868168	0.0424978	0.0119807	0.123082
				-0.00066461	-0.0902395	0.0308498	0.0643775	0.06678	0.0759124	-0.0423974	-0.149849
				-0.0699599	0.0822896	0.143677	0.0849216	0.00802114	0.0239344	-0.0585901	-0.0840489
				0.182181	0.26684	-0.0866163	-0.000815868	0.0668914	-0.0360935	-0.0151166	0.128772
				-0.0581953	0.0258769	0.00037836	-0.153333	0.146144	0.0532287	-0.0882238	-0.0425227
				-0.00847585	-0.134278	0.139743	0.113445	0.0523327	0.00534053	-0.150112	0.0271278
				0.0843625	0.0920802	0.112863	-0.00626576	-0.0319522	-0.00945141	-0.029284	-0.0126191
				-0.0313734	0.0332154	0.205247	0.0227505	0.00888731	-0.0551446	-0.0902231	0.009365
				0.185374	0.0792188	-0.0818355	-0.0782795	0.081182	0.193091	-0.0514863	0.00965089
				-0.0448566	-0.0288349	0.0434609	0.0127437	0.0840677	0.0567063	-0.0689527	-0.0197337
				0.0412702	0.0429977	-0.0657991	-0.106545	0.00640231	-0.00714952	-0.0328613	0.0325893
				-0.113228	0.0325495	0.109579	0.11277	0.0521393	0.00376545	0.131347	0.0207617
				0.0173466	-0.0105303	-0.0479103	-0.247913	0.155296	0.0425563	-0.0529272	-0.104193
				0.0825622	-0.012416	-0.0422761	-0.0600801	-0.0294005	-0.0467349	0.0137506	0.143655
				0.140253	0.210675	0.122303	0.106164	0.0455055	-0.0302322	0.145943	0.118162
				0.0644094	0.035166	-0.0812258	-0.164811	0.121716	0.186072	0.0315978	0.0581111
				0.0433242	0.0181876	-0.0359456	-0.115706	0.0091999	0.119502	0.0285108	0.0086786
				0.0290836	0.0553434	-0.120889	-0.187276	-0.0336341	-0.0558602	0.0399577	0.0689608
				0.0154821	0.0246246	0.0685802	-0.0750588	0.227441	0.118878	-0.0255028	-0.0274193
				-0.107613	-0.167741	-0.0432295	-0.118133	0.0148231	0.0282	-0.0126753	0.0439208
				0.0872537	0.112939	-0.000767693	-0.0570949	0.103576	0.0659252	-0.0698403	-0.160711
				0.0621311	-0.00410317	0.0676751	-0.0416102	-0.0853555	-0.0571754	0.00627464	0.105445
				-0.213703	-0.100588	0.0546345	-0.0636898	0.0341962	0.0473223	0.0590244	0.0455111
				-0.0314549	-0.0477407	0.0255475	-0.0104667	-0.0306433	0.0254903	0.0269443	-0.048081
				-0.0450373	-0.040326	0.0763238	-0.0291258	0.0535609	0.0713317	-0.00187034	-0.0355647
				-0.00128304	-0.0264171	-0.106643	-0.154126	-0.0166039	0.0075598	-0.00700252	-0.00754498
				0.198285	0.182277	0.0427382	0.0173767	0.0644012	0.0014201	-0.00410223	0.0507499
				0.160095	0.221402	-0.104509	-0.210387	0.0132541	-0.00128788	-0.00116334	-0.027024
				-0.0470405	0.0561291	-0.0655182	-0.156155	-0.0568075	-0.0809415	-0.0394104	-0.0210541
				0.144248	0.116384	-0.148707	-0.182322	0.220718	0.121611	-0.0349564	-0.00811093
				-0.0398025	-0.0883626	-0.0832165	-0.0259302	0.0164688	0.0823648	0.0476051	-0.016543
				-0.0356537	-0.164343	-0.127976	-0.225516	-0.00542701	-0.00551981	0.0749732	0.0779305
				-0.139052	0.0254947	-0.0601932	-0.044138	-0.112015	-0.133827	-0.0921523	-0.0106778
				0.0968771	-0.00474826	0.0859327	0.0280825	0.110313	0.09029	0.00904442	0.0171628
				0.000236236	-0.132347	-0.00165659	-0.0635533	0.0880762	0.0978886	0.00747953	0.0326165
				-0.0554885	-0.0335196	0.0870467	0.0444704	0.0998344	-0.0580667	-0.00574484	-0.0779189
				-0.0577534	-0.100699	0.0624683	-0.0273444	0.0646854	0.0379009	0.0739044	0.107044
				0.219287	0.0440967	0.000690416	-0.0784745	0.0824917	0.0928738	-0.000768436	0.00127049
						-0.014161	-0.104271	0.103457	-0.094314	0.05208	0.0148981
						0.111533	0.0132107	0.119411	0.0373131	-0.0662208	-0.112012
						-0.0875955	-0.0519048	0.0760824	-0.0529421	-0.0228742	0.0347648
						-0.0164652	-0.123054	0.080397	0.138972	0.117644	0.0983903
						-0.0373579	-0.107406	-0.0253352	0.012306	0.0217661	0.142416
						-0.0272711	-0.022673	0.0597755	-0.0680918	-0.00396742	-0.00076396
						-0.00972259	-0.0736027	0.0975935	0.0551316	-0.127977	-0.0488932
						0.0158073	0.0232855	0.162236	0.0733723	-0.00457536	-0.0218974
						0.0155211	-0.0344566	0.0149088	-0.029647	0.103748	0.073488
						0.108848	0.0962172	0.0760322	0.00839145	-0.00287839	0.195594
						-0.0505207	-0.196936	-0.0322473	-0.0615172	0.0442039	0.0133571
						-0.0840795	-0.173991	-0.051643	-0.122247	0.0387245	0.128532
						-0.114308	-0.130178	-0.0106755	-0.0139232	-0.0286476	0.0322566
						0.0100741	-0.0801551	-0.124078	-0.168217	0.00326634	-0.0491298
						0.0581744	-0.0778053	-0.0438395	-0.0863954	0.117916	0.0410779
						0.0041021	-0.00115481	-0.0410565	-0.0656835	-0.0227482	0.00109018
						-0.137432	0.0735622	0.0118185	0.00641441	0.0773877	0.0202806
						0.00839078	-0.00992763	-0.0115797	-0.0670766	-0.062357	-0.0691662
						-0.1268	-0.0838746	0.0177887	-0.01989	-0.0422148	-0.0638213
						0.147234	0.079714	0.0292856	0.015093	-0.0222962	-0.011157
						0.084847	-0.0278504	0.0469406	-0.016175	0.0975024	0.0970029
						-0.0107858	-0.0398197	0.0380299	0.0141392	0.0409696	0.0863499
						-0.0507626	-0.0263667	0.0435797	0.0263641	0.0718713	-0.0523731
						0.0766734	0.0453546	-0.0418061	-0.105901	0.0478176	0.063726
						0.019672	-0.050112	0.0755381	-0.0479567	-0.0457471	-0.0806646
						0.0039512	0.0243463	0.00480465	-0.00477667	0.0737698	-0.0420137
						-0.0384742	-0.0386446	-0.0205281	0.0194191	0.200533	0.0943855
						0.0850598	0.112728	-0.0178587	0.0307067	0.04787	0.0299766
						0.0972541	0.0836748	0.035395	-0.00669265	0.0668514	0.0457154
						0.0672365	0.171147	0.122473	0.138685	0.278855	-0.0841066
						-0.0244187	0.0979877	0.0308917	0.059476	-0.023479	-0.0314536
						0.0710171	0.0945746	0.00852631	0.0256557	0.117149	-0.0380402
						-0.0134352	0.162153	-0.0448875	-0.102031	0.0279901	0.0973953
						0.0872388	0.0968013	0.0190126	0.0535299	0.0916561	0.11463
						0.113108	0.0808465	0.0529586	0.047263	-0.0458102	-0.0467556
						0.212164	0.158537	0.0792407	0.0738837	-0.01619	0.0281163
						-0.0855923	-0.117009	-0.0109975	0.0177905	-0.00988036	0.0274523
						0.00224639	-0.0716107	-0.0162595	0.0402263	-0.0278424	-0.0628892
						0.100513	0.0840045	0.086053	0.087654	-0.0829735	-0.0661183
						-0.027888	0.00605355	0.0986078	-0.0037961	0.0676044	0.0830744
						0.101335	0.102709	0.112621	0.0538633	-0.120543	-0.0901866
						-0.0246647	0.00253103	0.00507927	-0.0672624	-0.0408782	-0.096481
						-0.0578252	-0.0519908	0.116925	0.0826389	-0.0662779	-0.141794
						0.0350755	0.00219625	0.00697441	0.0505465	0.0138064	-0.00659025
						0.12781	0.158861	0.043274	0.0337406	0.0355986	0.0663796
						0.0730679	0.0305109	-0.0140643	0.0327412	0.108856	0.0239673
						0.144709	0.0703382	0.0250044	-0.0360958	0.0295941	0.114156
						-0.0763853	-0.136494	0.0282708	0.0929997	-0.210932	-0.131789
						-0.0818314	-0.0653272	0.0451289	-0.0397716	-0.115593	-0.014151
						0.0133662	-0.0320212	-0.00086528	-0.00761154	-0.129241	-0.0847116
						-0.00430445	0.0348079	0.114427	0.150994	0.0143567	0.0208358
						-0.193214	-0.241071	-0.0208057	-0.0399815	0.0516998	0.0875042
						-0.0159834	-0.121061	-0.0193234	0.0383789	0.113682	0.229782
						-0.0132449	-0.0409884	0.119182	0.0110096	0.0166983	0.000359569
						-0.0934858	-0.0792865	0.013625	-0.0156193	-0.0566963	0.0594939
						0.0373644	0.104955	0.0296616	-0.0905655	-0.0727087	-0.00992557
						0.0631738	0.0414979	-0.000618851	0.0725972	0.0179455	0.0545352
						-0.106756	-0.0837162	0.00716199	-0.0878617	-0.125665	-0.108181
						0.0539827	-0.0497448	-0.0268675	0.105408	-0.138189	-0.0445482
						-0.00705302	0.092092	0.0260595	0.00491745	0.0681346	0.00510814
						-0.0255737	-0.098203	-0.0458542	0.0143621	-0.0191769	0.0463647
						0.0832366	-0.0310087	0.0590281	0.0859216	0.0159404	0.126375
						0.0845095	0.117889	0.060027	0.0433896	0.00191938	0.134456
						-0.0886524	-0.242354	0.0798164	0.0943876	-0.0353048	-0.0397389
						0.0865723	0.0258508	0.0711446	0.12302	-0.0713507	-0.13186
						0.093878	0.138346	0.0621544	0.0251233	0.0167601	0.165477
						0.00158557	0.177705	0.0686863	-0.0113959	-0.0861868	0.0760785
						-0.0428649	-0.118669	-0.00621116	-0.0441286	-0.0620689	-0.107319
						0.0914591	-0.210605	0.010775	-0.0706215	-0.00186404	0.115815
						0.0450956	-0.0177025	0.101708	0.145434	0.1853	0.229498
						-0.0730862	-0.148181	0.0402704	-0.097414	-0.0239628	0.00533933
						-0.0711451	-0.135436	0.0758142	0.0329612	0.015426	-0.0204295
						-0.0805756	-0.058296	0.0342379	-0.0759066	0.0307832	0.0730164
						0.105267	-0.0403424	0.0498149	0.0528281	0.13598	0.0965275
						-0.13166	-0.110962	0.0519365	0.114067	0.0596334	0.0104016
						0.0243099	-0.0465145	-0.0972962	-0.0856192	0.00484285	0.148197
						0.0694098	0.114465	-0.0361456	0.0143132	0.038148	0.0343564
						0.0816379	0.00588764	0.0539333	0.048016	-0.0721182	-0.0392056
						-0.18223	-0.124001	0.0558536	0.00489599	-0.0583348	-0.0588562
						0.062843	-0.152667	0.068583	0.00429536	0.148057	0.18656
						0.0497606	-0.118245	0.0478648	0.0692439	0.0540436	0.167361
						-0.0983769	-0.0492995	-0.00496755	-0.0361799	0.0742142	0.0114507
						-0.157901	-0.173272	-0.016449	0.0684454	-0.0471889	-0.0368871
						0.011843	-0.0999951	0.0550893	-0.0382629	0.103188	0.175191
						0.12588	0.00424063	0.0391299	0.0420054	0.00146804	0.0594375
						0.0494508	-0.0125148	-0.0534582	-0.0776875	-0.0926242	0.136137
						0.0617126	-0.111107	0.124205	0.125122	-0.0132236	-0.0242251
						-0.0568818	-0.0226004	0.00856055	0.108845	-0.0465865	0.0400763
						0.11856	-0.0783163	0.0265811	0.045799	-0.134166	-0.0957708
						0.0774155	-0.00805125	-0.0807359	-0.0965414	-0.004219	-0.101988
						0.144574	0.00352061	0.0401699	0.069917	-0.191305	-0.196313
						0.102464	0.0259481	-0.123291	-0.0186363	-0.0788853	-0.00475513
						-0.0391629	-0.146361	-0.0879558	-0.0433816	-0.0685315	0.0670504
						0.1106	-0.0272589	0.0404751	0.0420522	-0.0551	0.132068
						0.204657	-0.0260149	0.00342303	0.0809677	-0.130302	-0.0379309
						0.0063636	-0.131207	0.140308	0.0250527	-0.102693	-0.0404059
						0.0536156	0.0599245	0.0857164	0.112659	-0.0979183	-0.054658
						-0.0476716	-0.0451822	0.028612	0.0561	-0.0843165	-0.045559
						-0.0695931	-0.00934823	0.0403253	-0.00741406	0.0285446	0.131451
						-0.0984225	-0.146751	0.078959	0.0414827	-0.0179064	0.0248399
						0.11848	0.0778988	0.0383397	0.0505512	-0.0796596	-0.048524
						-0.236987	-0.130678	0.126826	0.0663717	-0.0944555	-0.0749842
						-0.104482	-0.15841	0.00405731	0.127906	-0.0493395	-0.0256243
						0.0157744	-0.203955	-0.0238114	-0.00646588	-0.119284	-0.111217
						-0.00163418	-0.00202335	-0.0191889	-0.0279056	-0.09543	0.0543843
						0.0119599	0.026235	0.07629	0.102474	-0.0518349	-0.0967702
						0.0163081	-0.19339	0.00550116	0.127039	0.0534105	0.109157
						-0.0501966	0.0386931	0.0335155	-0.0540601	-0.0838633	0.0128102
						0.0919121	0.0627025	-0.0398486	-0.115188	-0.0231232	-0.0571566
						-0.0419145	0.0178754			-0.0435872	0.0292823
						0.0854378	-0.0486542			0.00617828	-0.0421879
						-0.0585209	-0.277936			-0.0945398	-0.223421
						0.0776101	0.0790512			-0.0998861	-0.0107486
						-0.00793629	-0.0452511			0.050769	0.0385615
						-0.0936793	-0.0289454			0.0920066	0.192179
						-0.150078	-0.128117			-0.034234	0.0381568
						0.0375233	-0.0195061			0.00676896	0.0728593
						-0.119369	-0.116913			0.0251129	0.0249033
						0.0414889	-0.0752084			0.00336367	0.0292919
						0.0109663	-0.0520559			-0.0777267	-0.0610861
						0.0564694	0.0730082			0.0536745	0.129529
						-0.0326007	-0.0855728			-0.103665	0.0220332
						0.0101217	-0.0209274			0.0286868	0.0203587
						0.0656657	-0.10352			-0.0706384	-0.0461595
						-0.0312809	-0.0775433			0.0844592	0.0546868
						-0.197564	-0.198835			-0.0204189	0.0857082
						-0.042806	-0.117929			-0.0506007	0.0363014
						-0.101314	-0.0936742			-0.059511	0.0112176
						-0.0586245	-0.111366			-0.00401796	-0.0344332
						0.017342	-0.0877726			-0.0697441	-0.0952561
						0.0937463	0.183898			0.037815	0.0932924
						-0.0419315	-0.11712			-0.08123	-0.119151
						-0.039044	-0.066371			-0.0423624	-0.0250922
						-0.111442	0.0476511			0.0113409	0.0722765
						-0.0618146	-0.16895			-0.0485454	0.129441
						0.0479157	0.0644701			0.00292184	0.0256204
						-0.10802	-0.124303			0.0063444	0.000728056
						0.00869847	-0.129602			-0.0168396	0.0110462
						-0.0323382	-0.034174			0.0104394	0.0886844
										0.044339	0.037924
										-0.0246541	0.0216309
										-0.055041	-0.0853021
										-0.0723238	-0.0875581
										-0.0455241	-0.149128
										0.0768924	0.105192
										0.0579623	-0.00808004
										0.126501	0.150148
										0.042925	0.0901076
										-0.0773202	0.0724206
										0.0193919	0.0624444
										0.0494227	0.0669244
										-0.110799	-0.000318661
										-0.113524	0.0559239
										0.0112748	0.0181137
										-0.0136533	0.008562
										-0.177861	-0.0856678
										-0.10221	0.0336093
										-0.160926	-0.116824
										-0.137581	-0.182474
										-0.0538184	0.0641335
										-0.169777	0.0633208
										-0.131508	-0.00848646
										-0.0204981	0.0454125
										-0.0314807	0.0130135
										-0.0497671	0.0702429
										-0.0989342	-0.093544
										0.245533	0.196197
										0.0252018	0.0416723
										-0.0899978	-0.0409285
										-0.0452042	-0.0103416
										0.0331064	0.0131418
										-0.121559	0.0282411
										-0.124889	-0.0516696
										0.0294574	0.0654699
										0.0300412	0.217181
										-0.0432099	0.000216484
										0.048838	-0.142827
										0.0939112	0.0736519
										0.00753616	0.0321963
										-0.0366599	-0.00658265
										-0.0641002	-0.0630038
										0.0461506	0.0110188
										0.14878	0.0661388
										0.2202	0.145891
										0.0566491	0.0610863
										0.112278	0.0153724
										-0.0374377	0.0539534
										-0.128101	-0.171444
										0.150464	0.116682
										0.0901722	-0.0480303
										-0.0684402	0.049359
										0.0497496	0.101382
										0.0956894	0.186895
										-0.0406196	-0.0140642
										0.0631485	0.0605397
										0.0493883	0.0106379
										-0.0922659	-0.0863263
										0.120689	-0.0599792
										0.0636554	0.0675119
										0.125446	0.193635
										0.103114	0.0912109
										0.232166	0.00584833
										-0.0573564	-0.0257583
										-0.0454423	-0.0456068
										0.0643306	0.0694974
										0.101293	0.0731433
										-0.101453	0.00775293
										-0.192331	-0.0225893
										-0.0271642	0.0347082
										-0.11244	0.00548741
										-0.0558398	0.0527464
										0.0203479	0.037837
										-0.032399	-0.0069774
										-0.0624498	-0.0675141
										-0.00307772	0.160725
										-0.143911	0.03552
										0.144464	0.0278972
										-0.105131	-0.143149
										-0.123453	-0.0873039
										-0.118372	-0.104684
										0.0338291	0.0115882
										-0.010586	-0.0413573
										-0.0239894	-0.0655127
										-0.0527365	-0.218167
										-0.0417266	0.00199826
										-0.0105984	-0.0185668
										0.0461571	0.0721944
										0.0119576	-0.0552191
										0.0520863	-0.110063
										0.0388994	0.0647652
										0.0636723	0.036037
										-0.11611	-0.15838
										-0.0192182	0.0224785
										-0.0599789	-0.0573973
										-0.00127162	-0.022396
										0.0200869	0.0170964
										-0.043554	-0.0287506
										-0.0245002	-0.0664813
										0.0563851	-0.0496012
										-0.0304033	0.0260313
										0.0132573	-0.0214007
										-0.151792	-0.100671
										0.0837169	0.0194036
										0.0297842	0.0766891
										0.0153864	0.0548432
										-0.0674455	0.0650696
										-0.0734026	0.0464199
										-0.0382805	-0.0754299
										0.0423645	-0.0723253
										-0.0715704	0.00724752
										-0.173609	-0.106068
										-0.147232	0.102274
										0.0125954	0.0705769
										-0.0636666	-0.0589105
										-0.0207001	-0.038553
										-0.0809857	0.149755
										-0.056214	-0.0373892
										-0.162042	-0.0204165
										-0.203521	-0.00127923
										0.0609639	0.0385776
										0.114189	-0.0139145
										-0.102113	0.029949
										-0.186704	-0.0456781
										0.146297	0.100652
										-0.0669482	0.0250289
										-0.0916342	0.0177097
										0.0737072	0.135126
										0.102981	0.106108
										-0.103108	-0.105078
										0.0473326	0.0288435
										0.00744493	-0.024734
										0.00240777	0.0316572
										0.00158941	-0.0469026
										0.113441	0.0414417
										-0.0425365	0.0127034
										0.00964928	0.0922728
										-0.0313006	-0.0345566
										0.0483051	0.0727676
										0.00992279	0.0136438
										-0.0532243	-0.0455384
										-0.118455	-0.14262
										-0.0725448	-0.0486936
										0.00291361	0.0342532
										0.111447	-0.0299356
										-0.0128851	-0.027918
										-0.00426331	0.0159323
										-0.0298172	0.0713391
										-0.115931	-0.151986
										0.0212195	0.0136908
										-0.055531	-0.134427
										-0.0384428	-0.0383172
										-0.0593432	-0.0707241
										-0.000742048	0.0357149
										-0.0483216	-0.0375269
										0.00508243	0.16206
										-0.0149397	-0.103234
										-0.00189806	-0.0844773
										-0.0943557	0.0159999
										-0.0208672	0.0410607
										0.0142977	-0.056798
										-0.136299	0.0389779
										-0.040379	0.0569704
										-0.101714	0.0804934
										0.00874501	0.0790229
										0.023503	0.113947
										0.0124046	0.0359121
										-0.0526859	0.0393258
										-0.0636415	0.0909393
										-0.0521181	0.0698979
										-0.131392	-0.0870205
										-0.0469402	0.0438911
										0.126622	0.0631389
										0.0114806	0.0275758
										-0.056994	0.0291598
										-0.131964	-0.142194
										0.195333	0.0970877
										0.0673652	0.115181
										-0.042231	-0.0482085
										0.0822087	-0.0810117
										0.038209	-0.135832
										-0.0298984	0.0294614
										-0.0920628	-0.0500403
										0.0892072	0.102629
										0.0373734	0.054366
										-0.0623789	-0.050145
										0.0166339	0.0750936
										0.120693	0.00935773
										-0.0717581	-0.0532308
										-0.031726	0.00260497
										0.0442231	0.0480513
										-0.0211083	-0.0217993
										0.0293968	0.0202678
										0.0363125	0.0326285
										0.0357398	0.0371152
										0.0835611	0.0531021
										0.0839238	0.131515
										-0.020017	0.0819502
										0.0142482	-0.0392597
										0.0236515	-0.00290714
										0.095777	0.147639
										0.123175	0.0588767
										0.0182484	0.0160592
										-0.0190514	0.0229974
										0.0991871	0.0742677
										0.0699134	0.0488765
										0.0274422	0.0413508
										-0.035806	-0.0305338
										0.0090999	0.0420825
										0.0176108	0.0406476
										0.0449371	0.114298
										0.00893472	0.0784466
										0.0913469	0.0203603
										0.0316565	-0.0396908
										0.0513548	0.0618633
										-0.235932	-0.141367
										0.0486672	0.0839688
										-0.0484215	-0.0076827
										0.0642813	0.0109862
										-0.0266695	0.055294
										0.0557613	0.0394188
										0.0896282	0.0695243
										0.0138958	0.0792414
										0.118943	0.0416902
										-0.0198219	0.0652139
										0.0238041	0.0680353
										-0.0538365	0.0413862
										-0.149982	0.00776952
										-0.0694807	-0.0906198
										0.0944481	-0.0387444
										0.0105379	0.0794357
										-0.0785147	-0.116669
										0.0243052	0.0793547
										-0.0246191	0.0313432
										-0.0709082	-0.0103154
										-0.0457778	-0.0148626
										-0.0656362	-0.0556711
										-0.0567229	-0.100275
										0.0323767	0.083327
										0.028309	0.0116056
										-0.0480747	-0.0704976
										0.0208831	-0.00840788
										-0.14193	-0.0748695
										-0.112927	0.00268301
										-0.0160309	0.00112832
										-0.0485726	-0.0738554
										-0.0757409	-0.0342584
										-0.059404	0.00139626
										0.108987	0.123694
										0.0135184	0.0378954
										0.0100172	0.0266295
										0.00761311	0.0268885
										-0.0650577	-0.0429826
										0.0198831	0.0778855
										-0.0347761	-0.0659768
										0.0610333	-0.0255819
										0.0996013	0.0418576
										0.020449	-0.0769514
										-0.00149944	-0.0125209
										-0.19908	-0.162779
										-0.11816	-0.0882798
										-0.0652313	-0.0258349
										0.0427338	-0.0017854
										-0.112912	-0.120309
										-0.0201531	-0.0769602
										0.0552366	0.0132349
										-0.168779	-0.0789605
										-0.0157526	-0.0360748
										0.0996217	-0.0396822
										0.0515898	0.0554954
										0.0151699	0.060324
										-0.0219298	-0.0424185
										0.0614256	0.00321049
										0.130946	0.114031
										-0.0395333	-0.0620139
										0.0566096	0.0734425
										-0.0499774	0.00433767
										-0.16233	-0.118335
										0.0976796	-0.0109258
										-0.162196	-0.0307026
										0.171174	-0.00278728
										0.0388086	0.0110421
										0.0212022	-0.0779715
										-0.0661631	-0.045346
										-0.0673975	0.0874374
										0.0368145	-0.00754781
										0.0240295	0.0571804
										0.105641	0.116167
										0.117052	-0.137216
										-0.0644222	-0.0506173
										-0.0441448	-0.0746046
										0.0868057	0.0727896
										-0.0543535	0.0265755
										-0.0262844	0.0874254
										-0.0190112	0.167586
										-0.0494462	0.0296343
										-0.059633	-0.0111807
										-0.0937218	-0.0631224
										0.0451918	0.07019
										-0.0190661	-0.0133273
										0.0674503	0.00970381
										0.163169	0.0226981
										0.0743616	0.173197
										0.0390358	0.0649819
										-0.0677225	0.0716835
										0.0548159	-0.0122486
										-0.025152	-0.0368062
										-0.0314842	-0.0316924
										0.0535177	0.0999989
										0.013417	-0.0339085
										0.0717689	0.0189559
										0.0343753	0.0176679
										-0.0340351	-0.0121743
										0.0326153	0.0488215
										0.0229495	0.059464
										0.0492597	0.0307647
										-0.0484855	-0.0133937
										0.0077635	0.03589
										-0.102268	0.0646155
										-0.218103	-0.0232159
										-0.0364628	-0.149477
										0.00629004	0.0355823
										-0.148237	-0.0496434
										0.095739	0.137428
										-0.103903	0.0471151
										-0.0183414	0.0700387
										-0.0523333	0.0238225
										-0.0798478	-0.0480769
										-0.0274348	0.0851113
										-0.0754959	-0.0115819
										-0.0615574	-0.0210354
										-0.0155212	0.0543083
										-0.0477963	-0.0223713
										0.00379655	-0.087566
										0.0122751	-0.0293051
										-0.00901987	-0.0260322
										-0.00225937	-0.106136
										0.0338055	0.0597952
										-0.0530931	0.0260402
										0.0537477	-0.054671
										-0.0296405	-0.00141899
										-0.0268192	0.0674794
										-0.040167	-0.0501932
										0.0763556	-0.0502201

## Sheet: Fig3
Absolute value of Spearman correlation for single cells (panel f); NaN indicates lack of receptive field or subunits (values excluded from plot)
ON parasol		OFF parasol		ON midget		OFF midget		Unclassified
linear filter	nonlinear subunits	linear filter	nonlinear subunits	linear filter	nonlinear subunits	linear filter	nonlinear subunits	linear filter	nonlinear subunits
0.568836	0.702036	0.538891	0.543904	0.500866	0.605149	0.891853	0.880963	0.0946363	0.0501632
0.643651	0.727553	0.899051	0.878626	0.578075	0.600377	0.848935	0.89208	0.322592	0.40575
0.647408	0.728912	0.952793	0.953023	0.274117	0.341277	0.908296	0.92573	0.793186	0.910523
0.613301	0.758559	0.873678	0.880087	0.099633	0.101963	0.870664	0.869049	0.421413	0.428257
0.549283	0.66849	0.959088	0.963057	0.109611	0.254857	0.818736	0.802651	0.405948	0.37945
0.705927	0.833805	0.962169	0.974446	0.158798	0.288226	0.949351	0.925551	0.440291	0.642354
0.749819	0.839314	0.982077	0.980594	0.311651	0.34462	0.922143	0.904471	0.592852	0.599376
0.709812	0.787653	0.972501	0.978926	0.283632	0.336682	0.885133	0.823936	0.501077	0.637768
0.758647	0.866997	0.95058	0.961498	0.474	0.588045	0.906763	0.899907	0.988291	0.985335
0.619067	0.732612	0.982857	0.98426	0.00585667	0.0538388	0.899518	0.899706	0.880496	0.963031
0.526234	0.621278	0.933439	0.944116	0.326889	0.379076	0.891806	0.859386	0.989295	0.984834
0.820103	0.906948	0.983498	0.974287	0.39073	0.482074	0.901643	0.884075	0.842206	0.952547
0.665642	0.751604	0.957415	0.979143	0.498324	0.557256	0.832367	0.855324	0.539628	0.67424
0.581393	0.666613	0.979352	0.981716	0.429522	0.473153	0.891407	0.900714	0.618812	0.668077
0.697744	0.857664	0.980112	0.982473	0.0531126	0.078004	0.775921	0.826513	0.545466	0.587039
0.698265	0.72985	0.966766	0.969299	0.433816	0.515079	0.753665	0.809305	0.369868	0.503144
0.592203	0.730722	0.959461	0.964513	0.0564165	0.355609	0.601861	0.784373	0.564569	0.718369
0.634759	0.692202	0.871325	0.889456	0.0826357	0.292902	0.699949	0.842583	0.642197	0.677335
0.360707	0.3664	0.829173	0.88002	0.258466	0.22446	0.609658	0.754247	0.681897	0.732281
0.726785	0.840824	0.716647	0.74493	0.394233	0.428376	0.709094	0.831235	0.26225	0.308459
0.559818	0.680109	0.844451	0.853082	0.290851	0.333496	0.647415	0.752886	NaN	0.547214
0.604548	0.65613	0.837331	0.869428	0.0876441	0.179922	0.640898	0.774935	0.500744	0.628532
0.489275	0.556675	0.674301	0.703656	0.416545	0.475654	0.733226	0.831715	0.579876	0.648784
0.755002	0.77598	0.932449	0.926572	0.333189	0.479208	0.752529	0.890795	NaN	0.647879
0.613965	0.781982	0.691999	0.883927	0.359367	0.417313	0.665594	0.780073	0.0909234	0.195586
0.5202	0.633024	0.593443	0.71985	0.168615	0.366009	0.562781	0.686735	0.718523	0.793615
0.374047	0.503701	0.68188	0.822712	0.712601	0.80943	0.624713	0.703114	NaN	NaN
0.124341	0.103858	0.571446	0.692814	0.52152	0.742897	0.659566	0.770672	NaN	NaN
0.108657	0.270057	0.665741	0.825315	0.806522	0.88355	0.689454	0.813638	0.513656	NaN
0.41895	0.543923	0.793333	0.925719	0.690799	0.745382	0.791832	0.930903	0.669913	0.889577
0.346551	0.562228	0.221207	0.215544	0.517788	0.589123	0.739923	0.90307	0.687589	0.828788
0.367726	0.508096	0.334108	0.453287			0.800341	0.914032	0.245872	0.0545255
0.631325	0.783725	0.43912	0.637133			0.664395	0.823118	NaN	0.446033
0.587007	0.774693	0.507581	0.699973			0.7531	0.925409	NaN	0.00421456
0.401182	0.663071	0.497928	0.625853			0.871428	0.96778	0.0102165	0.197589
0.423286	0.678103	0.623915	0.658095			0.742896	0.905479	0.059981	0.321229
0.531203	0.718619	0.333823	0.578408			0.56318	0.621065	NaN	0.383369
0.585914	0.688774	0.0999004	0.31362			0.643397	0.794401	0.0166815	0.762006
0.516535	0.701732	0.138816	NaN			0.794498	0.910512	NaN	0.782205
0.62118	0.816779	0.211894	0.448238			0.684156	0.856004	0.599047	0.660306
0.507258	0.716338	0.216537	0.474927			0.788884	0.880917	0.59208	0.798904
0.666605	0.752943	0.670344	0.762812			0.673284	0.820049	0.0913566	0.258132
0.64295	0.765733	0.757581	0.80784			0.824065	0.893537	0.626942	0.806293
0.515581	0.709698	0.711228	0.787378			0.689594	0.791193	0.597063	0.688073
0.510905	0.749907	0.578014	0.667643			0.537507	0.617848	0.670822	0.858638
0.481128	0.559336	0.629682	0.698067			0.763888	0.864839	0.450131	0.459831
0.490097	0.632893	0.551674	0.653638			0.515908	0.632039	0.57641	0.751535
0.365792	0.527438	0.769208	0.805196			0.67751	0.831766	0.0607152	0.12508
0.464245	0.613742	0.819177	0.862281			0.648698	0.796392	NaN	0.108579
0.22639	0.330456	0.930207	0.950682			0.514505	0.700191	NaN	0.0541815
0.571868	0.812831	0.883228	0.917756			0.614842	0.776336	NaN	0.128664
0.356781	0.481017	0.871557	0.951449			0.648035	0.776604	0.0798443	0.0988441
0.0974227	0.334994	0.890687	0.93856			0.749069	0.89532	0.401664	0.583181
0.350802	0.523727	0.905598	0.913913			0.668815	0.757837	0.607852	0.767505
0.556461	0.697767	0.915132	0.905526			0.774047	0.903568	NaN	0.175222
0.344742	0.374512	0.941254	0.957662			0.668749	0.702911	0.0524044	0.373839
0.528061	0.784399	0.791557	0.794973			0.702411	0.771888	0.582471	0.71793
0.522111	0.683037	0.552185	0.657007			0.739766	0.783166	0.0887192	0.568117
0.718868	0.774408	0.858951	0.850032			0.269309	0.392927	0.278818	0.0788121
0.424159	0.41211	0.771858	0.888647			0.756837	0.904892	0.8098	0.895021
0.769824	0.821847	0.890076	0.89565			0.679959	0.738459	0.730505	0.826622
0.645363	0.785965	0.713362	0.725153			0.71492	0.848869	NaN	0.193793
0.800849	0.773619	0.723837	0.857828			0.736766	0.823493	0.741593	0.907817
		0.766595	0.797541			0.734899	0.848661	0.773058	0.928856
		0.643655	0.684243			0.674659	0.739246	0.159835	0.00511452
		0.854841	0.844764			0.64149	0.811191	0.182481	0.354267
		0.774767	0.812687			0.577721	0.626677	0.0310677	0.326326
		0.819177	0.818324			0.698961	0.795551	NaN	0.284171
						0.769155	0.754153	0.673767	0.715222
						0.654757	0.638691	0.182834	0.490399
						0.707867	0.729998	NaN	0.586533
						0.684956	0.703207	0.419022	0.451367
						0.641058	0.661798	0.123806	0.259625
						0.609287	0.689663	0.13155	0.486475
						0.548408	0.725797	NaN	0.427775
						0.620708	0.749923	0.0156951	0.04631
						0.519307	0.717877	0.788798	0.933211
						0.57545	0.664695	NaN	0.334153
						0.665861	0.58912	0.473003	0.626154
								0.786873	0.934797
								0.132984	0.420822
								NaN	0.315274
								NaN	0.511482
								NaN	0.271522
								NaN	0.420542
								0.596071	0.77864
								0.0366749	0.178122
								NaN	0.49401
								0.115646	0.419043
								0.273066	0.406925
								NaN	0.349766
								0.691689	0.827206
								NaN	0.530141
								NaN	0.372808
								NaN	0.220886
								0.682887	0.761418
								0.57038	0.674746
								0.0674388	0.268533
								0.732193	0.877446
								0.373461	0.32357
								NaN	0.472942
								0.227003	0.130616
								0.0256748	0.438776
								0.822308	0.915059
								NaN	0.240178
								0.128013	0.236722
								0.287606	0.312201
								NaN	NaN
								0.610786	0.686407
								0.755291	0.825853
								0.0123443	0.504239
								0.760619	0.844842
								0.0318174	0.0752051
								0.65198	0.813805
								0.0808156	0.330436
								0.485328	0.671082
								0.65118	0.783116
								0.635671	0.778342
								0.755673	0.868827
								0.445995	0.609132
								NaN	0.259285
								NaN	0.538158
								0.527206	0.663169
								NaN	0.258842
								0.376211	0.473511
								0.207974	0.116478
								0.689351	0.91841
								0.565603	0.666594
								0.0220402	NaN
								0.102188	0.11838
								0.276337	0.384824
								0.282451	NaN
								0.83107	0.940863
								0.00053317	0.115935
								0.245619	NaN
								NaN	0.842531
								NaN	0.519248
								0.380892	0.862586
								0.0236984	0.813846
								NaN	0.832681
								NaN	0.446502
								NaN	0.757172
								0.670649	0.852588
								0.739974	0.900642
								0.698375	0.783501
								0.0372207	0.789821
								0.745061	0.816711
								0.346518	0.548594
								0.617904	0.697254
								0.484865	0.590047
								0.66339	0.799047
								0.0815579	0.820122
								NaN	0.691847
								NaN	0.429877
								0.703587	0.679505
								0.751561	0.883878
								0.62757	0.791866
								NaN	0.758599
								0.805977	0.817128
								0.473512	0.540599
								NaN	0.813377
								0.718736	0.761621
								NaN	NaN
								0.816789	0.879284
								NaN	0.799209
								NaN	0.628676
								0.0255127	0.789409
								0.0770257	NaN
								NaN	0.769361
								0.671748	0.735133
								NaN	0.840427
								NaN	0.562206
								0.79301	0.815857
								0.582291	0.74214
								0.351878	0.759889
								0.176711	0.839841
								0.0894491	0.381114
								NaN	0.785244
								NaN	0.685438
								NaN	0.877559
								0.183752	NaN
								0.563489	0.790784
								NaN	0.783692
								NaN	0.775425
								NaN	NaN
								0.80777	0.872245
								0.718135	0.908248
								0.466185	0.855837
								NaN	0.819951
								0.189706	0.876614
								0.0826982	0.668377
								NaN	0.849872
								NaN	NaN
								0.526812	0.679689
								0.763891	0.9006
								0.0915057	0.865526
								0.579841	0.74782
								0.245224	0.79954
								0.0677557	0.88606
								0.0187543	0.817358
								0.712195	0.867143
								0.117742	0.512732
								0.0950812	0.85935
								0.147099	0.663632
								0.60565	0.771351

## Sheet: Fig4
R-squared performance values for different models of single cells (panel c); negative values clipped at zero; NaN indicates lack of receptive field or subunits, e.g., because grating stimulus was not available in all recordings
ON parasol			OFF parasol			ON midget			OFF midget			Transient-OΝα			Transient-OFFα			Sustained-OΝα			Sustained-OFFα
LN model	DoG LN model	subunit grid model	LN model	DoG LN model	subunit grid model	LN model	DoG LN model	subunit grid model	LN model	DoG LN model	subunit grid model	LN model	DoG LN model	subunit grid model	LN model	DoG LN model	subunit grid model	LN model	DoG LN model	subunit grid model	LN model	DoG LN model	subunit grid model
0.156131	0.530375	0.635982	0.189014	0.451023	0.513486	0.399888	0.412407	0.495983	0.52425	0.513506	0.583744	0.316369	NaN	NaN	0.591212	NaN	NaN	0.0751847	NaN	NaN	0.613656	NaN	NaN
0.140152	0.539895	0.549501	0.23442	0.627299	0.414627	0.13755	NaN	NaN	0.700176	0.685471	0.657931	0.122765	NaN	NaN	0.60331	NaN	NaN	0.386626	NaN	NaN	0.653835	NaN	NaN
0.267797	0.51786	0.587798	0.264822	0.488554	0.491328	0.410165	0.470964	0.473907	0.529767	0.51383	0.599367	0.502101	NaN	NaN	0.604812	NaN	NaN	0.359625	NaN	NaN	0.52428	NaN	NaN
0.170612	0.426549	0.643382	0.312245	0.281625	0.739907	0.332952	0.519328	0.528289	0.456113	0.50561	0.546941	0	NaN	NaN	0.595763	NaN	NaN	0.435369	NaN	NaN	0.680543	NaN	NaN
0.205317	0.567415	0.756836	0.278196	0.576821	0.548706	0.295669	0.494971	0.398838	0.463225	0.586887	0.553473	0.349697	NaN	NaN	0.510447	NaN	NaN	0.306066	NaN	NaN	0.507655	NaN	NaN
0.164497	0.509509	0.713213	0.445847	0.580591	0.578842	0.309041	0.458875	0.451106	0.508801	0.6008	0.676172	0.00194168	NaN	NaN	0.615665	NaN	NaN	0.423977	NaN	NaN	0.494966	NaN	NaN
0.219706	0.58394	0.649752	0.349528	0.541031	0.309796	0.366457	0.433902	0.456562	0.358217	0.611149	0.561217	0.307107	NaN	NaN	0.636197	NaN	NaN	0.305284	NaN	NaN	0.618637	NaN	NaN
0.238554	0.506965	0.721549	0.362384	0.693674	0.686362	0.2593	0.318067	0.436515	0.547996	0.704901	0.700532	0.210894	NaN	NaN	0.599545	NaN	NaN	0.532643	NaN	NaN	0.590909	NaN	NaN
0.032335	0.465476	0.581206	0.235397	0.508941	0.607405	0.445013	0.277245	0.42185	0.702595	0.720106	0.725819	0.352361	NaN	NaN	0.564279	NaN	NaN	0.627407	NaN	NaN	0.646022	NaN	NaN
0.219001	0.480113	0.676353	0.189945	0.516963	0.38173	0.350355	0.557791	0.57248	0.00104678	0.0150638	0.0636843	0.375979	NaN	NaN	0.476941	NaN	NaN	0.518708	NaN	NaN	0.632516	NaN	NaN
0.207367	0.621845	0.728794	0.222532	0.534587	0.36061	0.121421	0.469471	0.393134	0.193355	0.530233	0.507824	0.278859	NaN	NaN	0.641357	NaN	NaN	0.379099	NaN	NaN	0.561113	NaN	NaN
0.552612	0.716224	0.809113	0.475319	0.540914	0.565396	0.29995	0.456823	0.47538	0.551234	0.694421	0.750975	0.425653	NaN	NaN	0.491163	NaN	NaN	0.761546	NaN	NaN	0.556977	NaN	NaN
0.643599	0.58951	0.794743	0.640903	0.725038	0.749992	0.263947	0.309341	0.363529	0.375987	0.504623	0.55436	0.496943	NaN	NaN	0.586593	NaN	NaN	0.456652	NaN	NaN	0.573232	NaN	NaN
0.511804	0.617905	0.734005	0.639331	0.750782	0.771557	0.258641	0.339287	0.436504	0.140149	0.160281	0.357793	0.450824	NaN	NaN	0.456714	NaN	NaN	0.119971	NaN	NaN	0.557575	NaN	NaN
0.467154	0.577029	0.607999	0.699765	0.749498	0.803067	0.292176	0.71986	0.582294	0.521359	0.635983	0.629885	0.429358	NaN	NaN	0.633911	NaN	NaN	0.519199	NaN	NaN	0.504692	NaN	NaN
0.593066	0.638893	0.713013	0.615398	0.591463	0.804318	0.509424	0.543204	0.597745	0.607413	0.720808	0.722871	0.469833	NaN	NaN	0.58626	NaN	NaN	0.637558	NaN	NaN	0.470609	NaN	NaN
0.56414	0.702731	0.720611	0.535106	0.456768	0.678082	0.362926	0.655862	0.641234	0.57985	0.722273	0.725531	0.428308	NaN	NaN	0.563501	NaN	NaN	0.558189	NaN	NaN	0.702065	NaN	NaN
0.211097	0.290566	0.686681	0.706735	0.798841	0.821636	0.337289	0.520697	0.567689	0	0	0.469294	0.441994	NaN	NaN	0.642658	NaN	NaN	0.101169	NaN	NaN	0.58042	NaN	NaN
0.379983	0.433023	0.519531	0.465791	0.4963	0.550743	0.206353	0.393836	0.47618	0.608515	0.689182	0.701406	0.354886	NaN	NaN	0.600325	NaN	NaN	0.473803	NaN	NaN	0.620288	NaN	NaN
0.557413	0.585733	0.799547	0.326553	0.502406	0.559201	0.462135	0.783446	0.720605	0.730778	0.761947	0.757285	0.378028	NaN	NaN	0.627312	NaN	NaN	0.594075	NaN	NaN	0.48815	NaN	NaN
0.331842	0.520846	0.515675	0.481402	0.485538	0.528548	0.302587	0.494077	0.528348	0.110223	0.240887	0.410582	0.360706	NaN	NaN	0.511429	NaN	NaN	0.541781	NaN	NaN	0.302673	NaN	NaN
0.546595	0.683128	0.781922	0.564488	0.675051	0.709806	0.341682	0.662553	0.712956	0	0.225311	0.321499	0.375142	NaN	NaN	0.619623	NaN	NaN	0.370928	NaN	NaN	0.616706	NaN	NaN
0.544194	0.703588	0.772689	0.552727	0.701764	0.718268	0.37875	0.503746	0.43489	0.387338	0.574617	0.655781	0.376239	NaN	NaN	0.510337	NaN	NaN	0.725331	NaN	NaN	0.601092	NaN	NaN
0.300484	0.738511	0.574641	0.502543	0.490782	0.507171	0	0.317521	0.381509	0.481332	0.575424	0.59679	0.372513	NaN	NaN	0.584526	NaN	NaN	0.331306	NaN	NaN	0.542969	NaN	NaN
0.532859	0.429089	0.476637	0.500964	0.507118	0.569529	0.337239	0.441474	0.383885	0.678748	0.723973	0.708077	0.426773	NaN	NaN	0.527856	NaN	NaN	0.480792	NaN	NaN	0.6296	NaN	NaN
0.50181	0.485588	0.593123	0.783012	0.808261	0.591222	0.187027	0.52593	0.530915	0	0.1947	0.280359	0.300757	NaN	NaN	0.619044	NaN	NaN	0.257237	NaN	NaN	0.619639	NaN	NaN
0.59606	0.595758	0.76969	0.557684	0.675649	0.728522	0.341675	0.724443	0.584235	0.825031	0.816351	0.810025	0.344575	NaN	NaN	0.53843	NaN	NaN	0.356066	NaN	NaN	0.619939	NaN	NaN
0.426593	0.0182798	0.000285149	0.394409	0.478171	0.541372	0.405137	0.543382	0.581287	0.722303	0.738316	0.711024	0.289334	NaN	NaN	0.6171	NaN	NaN	0.641303	NaN	NaN	0.518488	NaN	NaN
0.549327	0.542482	0.649894	0.455859	0.581235	0.599894	0.51738	0.610586	0.539482	0.447287	0.589718	0.513715	0.25537	NaN	NaN	0.627968	NaN	NaN	0.442513	NaN	NaN	0.505181	NaN	NaN
0.424365	0.489676	0.638974	0.362993	0.425955	0.393035	0.585767	0.704968	0.697932	0.597036	0.771816	0.697734	0.300367	NaN	NaN	0.650875	NaN	NaN	0.424428	NaN	NaN	0.595088	NaN	NaN
0.458409	0.441853	0.643898	0.574973	0.674694	0.661018	0.498607	0.482021	0.481674	0.630633	0.722001	0.664535	0.148257	NaN	NaN	0.637864	NaN	NaN	0.536644	NaN	NaN	0.457882	NaN	NaN
0.368087	0.379245	0.644845	0.436952	0.6101	0.62157	0.534197	0.5769	0.562059	0	0.527061	0.498594	0.260262	NaN	NaN	0.573234	NaN	NaN	0.45807	NaN	NaN	0.764484	NaN	NaN
0.328772	0.42904	0.605798	0.65459	0.690265	0.706823	0.490506	0.616456	0.636598	0.719882	0.763676	0.744896	0.28078	NaN	NaN	0.634206	NaN	NaN	0.288933	NaN	NaN	0.565216	NaN	NaN
0.563769	0.529046	0.572304	0.544345	0.602077	0.618741	0.440976	0.262573	0.555763	0.63334	0.660676	0.633953	0.116344	NaN	NaN	0.460478	NaN	NaN	0.548364	NaN	NaN	0.442657	NaN	NaN
0.665244	0.553493	0.742276				0.321077	0.447637	0.370089	0.65147	0.755547	0.731427	0.348362	NaN	NaN	0.593753	NaN	NaN	0.616116	NaN	NaN	0.563198	NaN	NaN
0.297084	0.360294	0.535349				0.296401	0.513178	0.486486	0.763972	0.837846	0.804793	0.297294	NaN	NaN	0.613637	NaN	NaN	0.443117	NaN	NaN	0.645174	NaN	NaN
0.383325	0.459406	0.624449				0.240487	0.310582	0.367004	0.498344	0.572721	0.483355	0.295614	NaN	NaN	0.568812	NaN	NaN	0.623731	NaN	NaN	0.603921	NaN	NaN
0.403646	0.335141	0.543093				0.309699	0.420741	0.518876	0.63241	0.756608	0.654541	0.328862	NaN	NaN	0.068072	NaN	NaN	0.568041	NaN	NaN	0.589495	NaN	NaN
0.375486	0.324597	0.518307							0.600073	0.66864	0.608439	0.12458	NaN	NaN	0.524373	NaN	NaN	0.54628	NaN	NaN	0.491779	NaN	NaN
0.509223	0.555953	0.663819							0.779925	0.786389	0.678463	0.377248	NaN	NaN	0.526122	NaN	NaN	0.576108	NaN	NaN	0.493287	NaN	NaN
0.346079	0.444436	0.498889							0.390299	0.320325	0.50946	0.364086	NaN	NaN	0.605367	NaN	NaN	0.574261	NaN	NaN	0.660657	NaN	NaN
									0.550486	0.670395	0.702059	0.399889	NaN	NaN	0.481977	NaN	NaN	0.742854	NaN	NaN	0.372183	NaN	NaN
									0.211956	0.465219	0.49019	0.428271	NaN	NaN	0.332915	NaN	NaN	0.621869	NaN	NaN	0.603036	NaN	NaN
									0.378949	0.556125	0.557655	0.348715	NaN	NaN	0.487786	NaN	NaN	0.59767	NaN	NaN	0.539311	NaN	NaN
									0.511056	0.606306	0.566514	0.379409	NaN	NaN	0.484952	NaN	NaN	0.698884	NaN	NaN	0.580259	NaN	NaN
									0.495334	0.634654	0.685213	0.377347	NaN	NaN	0.359824	NaN	NaN	0.668634	NaN	NaN	0.392153	NaN	NaN
									0.178867	0.267594	0.29188	0.353953	NaN	NaN	0.464265	NaN	NaN	0.455586	NaN	NaN	0.61686	NaN	NaN
									0.63099	0.725205	0.69325	0.366852	NaN	NaN	0.399891	NaN	NaN	0.541708	NaN	NaN	0.639419	NaN	NaN
									0.275671	0.429443	0.392478	0.347425	NaN	NaN	0.459985	NaN	NaN	0.378778	NaN	NaN	0.520188	NaN	NaN
									0.0926653	0.105494	0.139791	0.309226	NaN	NaN	0.304254	NaN	NaN	0.165162	NaN	NaN	0.596889	NaN	NaN
									0.494923	0.55234	0.524439	0.374961	NaN	NaN	0.415229	NaN	NaN	0.381116	NaN	NaN	0.522222	NaN	NaN
									0.478489	0.570165	0.583609	0.428154	NaN	NaN	0.248854	NaN	NaN	0.595695	NaN	NaN	0.454048	NaN	NaN
									0.0651985	0.487921	0.554189	0.370282	NaN	NaN	0.366398	NaN	NaN	0.51163	NaN	NaN	0.531409	NaN	NaN
												0.346254	NaN	NaN	0.655383	NaN	NaN	0.47032	NaN	NaN	0.573904	NaN	NaN
												0.342847	NaN	NaN	0.481287	NaN	NaN	0.305439	NaN	NaN	0.576747	NaN	NaN
												0.42452	NaN	NaN	0.623136	NaN	NaN	0.273655	NaN	NaN	0.516567	NaN	NaN
												0.32933	NaN	NaN	0.0676017	NaN	NaN	0.337939	NaN	NaN	0.530453	NaN	NaN
												0.0811666	NaN	NaN	0.455479	NaN	NaN	0.395169	NaN	NaN	0.498438	NaN	NaN
												0.195676	NaN	NaN	0.502644	NaN	NaN	0.546554	NaN	NaN	0.59004	NaN	NaN
												0.274379	NaN	NaN	0.620446	NaN	NaN	0.249295	NaN	NaN	0.499612	NaN	NaN
												0.358275	NaN	NaN	0.613595	NaN	NaN	0.535067	NaN	NaN	0.275016	NaN	NaN
												0.236665	NaN	NaN	0.543677	NaN	NaN	0.418683	NaN	NaN	0.445628	NaN	NaN
												0.30893	NaN	NaN	0.497882	NaN	NaN	0.513382	NaN	NaN	0.424068	NaN	NaN
												0.41196	0.426517	0.410738	0.601894	NaN	NaN	0.474289	NaN	NaN	0.376608	NaN	NaN
												0.448788	0.445856	0.418376	0.537473	NaN	NaN	0.412719	NaN	NaN	0.360843	NaN	NaN
												0.408832	0.42088	0.368139	0.486869	NaN	NaN	0.351589	NaN	NaN	0.536251	NaN	NaN
												0.354061	0.412154	0.405304	0.421286	NaN	NaN	0.467267	NaN	NaN	0.337695	NaN	NaN
												0.42459	0.481006	0.455027	0.544486	NaN	NaN	0.471904	NaN	NaN	0.654114	NaN	NaN
												0.416563	0.455502	0.453327	0.617988	NaN	NaN	0.484356	NaN	NaN	0.256014	NaN	NaN
												0.465316	0.514882	0.511884	0.432525	NaN	NaN	0.404015	NaN	NaN	0.468466	NaN	NaN
												0.402478	0.44466	0.427688	0.535983	NaN	NaN	0.342978	NaN	NaN	0.446468	NaN	NaN
												0.436569	0.442191	0.419478	0.0192219	NaN	NaN	0.456794	NaN	NaN	0.604954	NaN	NaN
												0.443483	0.441749	0.418728	0.598554	NaN	NaN	0.388873	NaN	NaN	0.490846	NaN	NaN
												0.264209	0.264894	0.257312	0.449312	NaN	NaN	0.230118	NaN	NaN	0.57879	NaN	NaN
												0.38612	0.371441	0.381373	0.590451	NaN	NaN	0.354227	NaN	NaN	0.307419	NaN	NaN
												0.360814	0.392082	0.44941	0.551363	NaN	NaN	0.418304	NaN	NaN	0.267465	NaN	NaN
												0.394803	0.403647	0.419117	0.536133	NaN	NaN	0.336496	NaN	NaN	0.429125	NaN	NaN
												0.416619	0.429136	0.43784	0.463825	NaN	NaN	0.403939	NaN	NaN	0.34707	NaN	NaN
												0.464123	0.462942	0.445804	0.406328	NaN	NaN	0.367407	NaN	NaN	0.619408	NaN	NaN
												0.143375	0.143707	0.188377	0.483861	NaN	NaN	0.344703	NaN	NaN	0.570443	NaN	NaN
												0.157751	NaN	NaN	0.40811	NaN	NaN	0.378231	NaN	NaN	0.253149	NaN	NaN
												0.259748	NaN	NaN	0.417835	NaN	NaN	0.446201	NaN	NaN	0.279378	NaN	NaN
												0.279431	NaN	NaN	0.413118	NaN	NaN	0.437029	NaN	NaN	0.424137	NaN	NaN
												0.29769	0.274266	0.291856	0.348166	NaN	NaN	0.359615	NaN	NaN	0.608932	NaN	NaN
															0.416289	NaN	NaN	0.352003	NaN	NaN	0.207815	NaN	NaN
															0.270667	NaN	NaN	0.341841	NaN	NaN	0.0202458	NaN	NaN
															0.502501	NaN	NaN	0.418768	NaN	NaN	0.359902	NaN	NaN
															0.519172	NaN	NaN	0.383023	NaN	NaN	0.271585	NaN	NaN
															0.33343	NaN	NaN	0.334624	NaN	NaN	0.425096	NaN	NaN
															0.551704	NaN	NaN	0.204236	NaN	NaN	0.372751	NaN	NaN
															0.401349	NaN	NaN	0.300412	NaN	NaN	0.630616	NaN	NaN
															0.33868	NaN	NaN	0.218693	NaN	NaN	0.432512	NaN	NaN
															0.418637	NaN	NaN	0.399289	NaN	NaN	0.335576	NaN	NaN
															0.464804	NaN	NaN	0.446866	NaN	NaN	0.448708	NaN	NaN
															0.401736	NaN	NaN	0.332613	NaN	NaN	0.345771	NaN	NaN
															0.459677	NaN	NaN	0.295727	NaN	NaN	0.666372	NaN	NaN
															0.434669	NaN	NaN	0.213599	NaN	NaN	0.581534	NaN	NaN
															0.361749	NaN	NaN	0.291806	NaN	NaN	0.531743	NaN	NaN
															0.524374	NaN	NaN	0.332294	NaN	NaN	0.28438	NaN	NaN
															0.468643	NaN	NaN	0.601895	NaN	NaN	0.590956	NaN	NaN
															0.509986	NaN	NaN	0.23173	NaN	NaN	0.0615211	NaN	NaN
															0.329673	NaN	NaN	0.494227	NaN	NaN	0.0877113	NaN	NaN
															0.255017	NaN	NaN	0.319944	NaN	NaN	0.382182	NaN	NaN
															0.495668	NaN	NaN	0.714198	NaN	NaN	0.348305	NaN	NaN
															0.452152	NaN	NaN	0.718665	NaN	NaN	0.475429	NaN	NaN
															0.494266	NaN	NaN	0.0976619	NaN	NaN	0.555411	NaN	NaN
															0.424636	NaN	NaN	0.615233	NaN	NaN	0.383483	NaN	NaN
															0.492748	NaN	NaN	0.64221	NaN	NaN	0.510216	NaN	NaN
															0.417251	NaN	NaN	0.495632	NaN	NaN	0.527231	NaN	NaN
															0.436331	NaN	NaN	0.614337	NaN	NaN	0.546205	NaN	NaN
															0.350006	NaN	NaN	0.595655	NaN	NaN	0.707505	NaN	NaN
															0.490754	NaN	NaN	0.403767	NaN	NaN	0.515267	NaN	NaN
															0.441051	NaN	NaN	0.735029	NaN	NaN	0.488445	NaN	NaN
															0.525433	NaN	NaN	0.612743	NaN	NaN	0.498168	NaN	NaN
															0.558426	NaN	NaN	0.701244	NaN	NaN	0.548315	NaN	NaN
															0.485275	NaN	NaN	0.404453	NaN	NaN	0.489377	NaN	NaN
															0.348146	NaN	NaN	0.436919	NaN	NaN	0.309987	NaN	NaN
															0.38805	NaN	NaN	0.621352	NaN	NaN	0.14139	NaN	NaN
															0.356202	NaN	NaN	0.778083	NaN	NaN	0.548109	NaN	NaN
															0.439735	NaN	NaN	0.596909	NaN	NaN	0.539811	NaN	NaN
															0.522371	NaN	NaN	0.703958	NaN	NaN	0.446316	NaN	NaN
															0.380784	NaN	NaN	0.559935	NaN	NaN	0.510937	NaN	NaN
															0.590066	NaN	NaN	0.700318	NaN	NaN	0.551446	NaN	NaN
															0.460341	NaN	NaN	0.0307686	NaN	NaN	0.337013	NaN	NaN
															0.435573	NaN	NaN	0.667019	NaN	NaN	0.35543	NaN	NaN
															0.403554	NaN	NaN	0.661834	NaN	NaN	0.583317	NaN	NaN
															0.225455	NaN	NaN	0.539997	NaN	NaN	0.435352	NaN	NaN
															0.481534	NaN	NaN	0.686522	NaN	NaN	0.508997	NaN	NaN
															0.392003	NaN	NaN	0.577874	NaN	NaN	0.478328	NaN	NaN
															0.463541	NaN	NaN	0.645818	NaN	NaN	0.566087	NaN	NaN
															0.331766	NaN	NaN	0.621348	NaN	NaN	0.517847	NaN	NaN
															0.508875	NaN	NaN	0.765881	NaN	NaN	0.523877	NaN	NaN
															0.463811	NaN	NaN	0.633471	NaN	NaN	0.455285	NaN	NaN
															0.377466	NaN	NaN	0.61112	NaN	NaN	0.466547	NaN	NaN
															0.398594	NaN	NaN	0.553781	NaN	NaN	0.307149	NaN	NaN
															0.405502	NaN	NaN	0.586946	NaN	NaN	0.565293	NaN	NaN
															0.369058	NaN	NaN	0.506224	NaN	NaN	0.421207	NaN	NaN
															0.505023	NaN	NaN	0.534778	NaN	NaN	0.405159	NaN	NaN
															0.553208	NaN	NaN	0.633813	NaN	NaN	0.565151	NaN	NaN
															0.439446	NaN	NaN	0.607296	NaN	NaN	0.510474	NaN	NaN
															0.489612	NaN	NaN	0.465361	NaN	NaN	0.55097	NaN	NaN
															0.528052	NaN	NaN	0.571321	NaN	NaN	0.645444	NaN	NaN
															0.513722	NaN	NaN	0.551882	NaN	NaN	0.618094	NaN	NaN
															0.524636	NaN	NaN	0.583687	NaN	NaN	0.444156	NaN	NaN
															0.534128	NaN	NaN	0.660496	NaN	NaN	0.663058	NaN	NaN
															0.564422	NaN	NaN	0.555112	NaN	NaN	0.55285	NaN	NaN
															0.460115	NaN	NaN	0.577197	NaN	NaN	0.533158	NaN	NaN
															0.522614	NaN	NaN	0.513544	NaN	NaN	0.520638	NaN	NaN
															0.586125	NaN	NaN	0.429606	NaN	NaN	0.455265	NaN	NaN
															0.36008	NaN	NaN	0.283133	NaN	NaN	0.223607	NaN	NaN
															0.43439	NaN	NaN	0.590618	NaN	NaN	0.278722	NaN	NaN
															0.482193	NaN	NaN	0.412861	NaN	NaN	0.372142	NaN	NaN
															0.636321	NaN	NaN	0.550598	NaN	NaN	0.177993	NaN	NaN
															0.540963	NaN	NaN	0.391991	NaN	NaN	0.439138	NaN	NaN
															0.52252	NaN	NaN	0.421299	NaN	NaN	0.471626	NaN	NaN
															0.509874	NaN	NaN	0.475638	NaN	NaN	0.465318	NaN	NaN
															0.402162	NaN	NaN	0.545227	NaN	NaN	0.0806097	NaN	NaN
															0.385176	NaN	NaN	0.489037	NaN	NaN	0.444516	NaN	NaN
															0.400877	NaN	NaN	0.542766	NaN	NaN	0.594686	NaN	NaN
															0.491344	NaN	NaN	0.558175	NaN	NaN	0.286398	NaN	NaN
															0.486746	NaN	NaN	0.706392	NaN	NaN	0.594921	NaN	NaN
															0.511051	NaN	NaN	0.702149	NaN	NaN	0.417306	NaN	NaN
															0.595385	NaN	NaN	0.636663	NaN	NaN	0.393512	NaN	NaN
															0.511495	NaN	NaN	0.623165	NaN	NaN	0.610941	NaN	NaN
															0.511469	NaN	NaN	0.468563	NaN	NaN	0.500216	NaN	NaN
															0.440399	NaN	NaN	0.60998	NaN	NaN	0.35592	NaN	NaN
															0.532216	NaN	NaN	0.74104	NaN	NaN	0.466424	NaN	NaN
															0.61706	NaN	NaN	0.594751	NaN	NaN	0.381161	NaN	NaN
															0.450528	NaN	NaN	0.558392	NaN	NaN	0.280175	NaN	NaN
															0.533404	NaN	NaN	0.650053	NaN	NaN	0.565655	NaN	NaN
															0.538063	NaN	NaN	0.664597	NaN	NaN	0.573242	NaN	NaN
															0.313295	NaN	NaN	0.559927	NaN	NaN	0.435301	NaN	NaN
															0.365954	NaN	NaN	0.480081	NaN	NaN	0.430016	NaN	NaN
															0.282829	NaN	NaN	0.730015	NaN	NaN	0.442719	NaN	NaN
															0.359367	NaN	NaN	0.707945	NaN	NaN	0.386111	NaN	NaN
															0.348163	NaN	NaN	0.55064	NaN	NaN	0.316994	NaN	NaN
															0.392255	NaN	NaN	0.587844	NaN	NaN	0.582192	NaN	NaN
															0.345648	NaN	NaN	0.671326	NaN	NaN	0.54318	NaN	NaN
															0.328937	NaN	NaN	0.720559	NaN	NaN	0.0551742	0.279302	0.270985
															0.389757	NaN	NaN	0.485114	NaN	NaN	0.0512343	0.505115	0.482957
															0.462794	NaN	NaN	0.542037	NaN	NaN	0.0789317	0.50234	0.465272
															0.483955	NaN	NaN	0.317349	NaN	NaN	0.129124	0.413549	0.401309
															0.485512	NaN	NaN	0.462902	NaN	NaN	0.419558	0.589879	0.57839
															0.522559	NaN	NaN	0.404633	NaN	NaN	0.166842	0.59063	0.557139
															0.507707	NaN	NaN	0.258836	NaN	NaN	0.0520067	0.128278	0.121382
															0.49164	NaN	NaN	0.412404	NaN	NaN	0.0559754	0.152143	0.149522
															0.488093	NaN	NaN	0.307355	NaN	NaN	0.0203667	0.0899399	0.0884444
															0.366958	NaN	NaN	0.35784	NaN	NaN	0.133558	0.1401	0.118528
															0.436507	NaN	NaN	0.462336	NaN	NaN	0.240919	0.231766	0.222166
															0.459879	NaN	NaN	0.49328	NaN	NaN	0.605854	0.623975	0.633838
															0.466035	NaN	NaN	0.337798	NaN	NaN	0.242314	0.426424	0.395952
															0.432032	NaN	NaN	0.512408	NaN	NaN	0.257105	0.497039	0.508072
															0.442177	NaN	NaN	0.527869	NaN	NaN	0.215179	0.629446	0.632612
															0.548872	NaN	NaN	0.535084	NaN	NaN	0.529094	0.563867	0.552951
															0.486798	NaN	NaN	0.561811	NaN	NaN	0.436364	0.471445	0.444762
															0.415236	NaN	NaN	0.59281	NaN	NaN	0.24042	0.364167	0.313253
															0.450079	NaN	NaN	0.634279	NaN	NaN	0.420838	0.128499	0.128433
															0.563033	NaN	NaN	0.497791	NaN	NaN	0.418766	0.440544	0.417918
															0.466966	NaN	NaN	0.456175	NaN	NaN	0.181882	0.236519	0.226036
															0.48025	NaN	NaN	0.598087	NaN	NaN	0.141107	0.282841	0.268072
															0.460848	NaN	NaN	0.498106	NaN	NaN	0.17873	0.17516	0.130834
															0.528292	NaN	NaN	0.487813	NaN	NaN	0.113019	0.156074	0.148857
															0.526146	NaN	NaN	0.549348	NaN	NaN	0.669049	0.657311	0.65312
															0.507583	NaN	NaN	0.41033	NaN	NaN	0.19531	0.167478	0.138154
															0.520634	0.551672	0.557163	0.534411	NaN	NaN	0.550112	0.573778	0.525132
															0.391813	0.397867	0.362072	0.433729	NaN	NaN	0.469174	0.434035	0.39725
															0.49904	0.480376	0.502136	0.469324	NaN	NaN	0.313742	0.265354	0.243365
															0.44996	0.390656	0.429037	0.571381	NaN	NaN	0.183263	0.288317	0.264363
															0.3903	0.342761	0.341613	0.438503	NaN	NaN	0.154403	0.0698432	0.0650802
															0.378966	0.37863	0.382372	0.460784	NaN	NaN	0.149735	0.176536	0.161405
															0.346305	0.305318	0.36837	0.416342	NaN	NaN	0.146051	0.147204	0.100988
															0.358695	0.394786	0.40822	0.359238	NaN	NaN	0.267155	0.152329	0.124406
															0.330272	0.369573	0.410903	0.624147	NaN	NaN	0.102341	0.134846	0.119346
															0.339771	0.340813	0.384086	0.436974	NaN	NaN	0.291987	0.275358	0.254562
															0.535466	0.56389	0.598413	0.585427	NaN	NaN	0.173974	0.0812092	0.0523834
															0.557337	0.565821	0.580221	0.552364	NaN	NaN	0.311157	0.291065	0.222311
															0.5825	0.598466	0.639403	0.286758	NaN	NaN	0.278374	0.178795	0.133165
															0.589491	0.599928	0.610831	0.59313	NaN	NaN	0.270007	0.242568	0.230955
															0.557161	0.574151	0.60395	0.549726	NaN	NaN	0.156505	0.172848	0.160349
															0.375836	0.410729	0.433998	0.570594	NaN	NaN	0.401476	0.454862	0.450545
															0.539543	0.545697	0.498913	0.39568	NaN	NaN	0.249264	0.120206	0.109579
															0.500266	0.526525	0.560053	0.572969	NaN	NaN	0.580468	0.677502	0.663387
															0.454659	0.476504	0.479563	0.674573	0.71567	0.784517	0.246402	0.20278	0.140071
															0.420809	0.45193	0.462461	0.763162	0.801829	0.839999	0.216179	0.267521	0.251062
															0.539201	0.580928	0.58607	0.607073	0.6384	0.77336	0.523147	0.571082	0.546489
															0.525092	0.531096	0.562413	0.746585	0.775709	0.806328	0.501058	0.549917	0.475143
															0.503694	0.506197	0.530845	0.632907	0.64316	0.725147	0.183299	0.156802	0.133946
															0.36416	0.440973	0.456646	0.59789	0.592605	0.752367	0.507141	0.526378	0.498808
															0.533423	0.532514	0.575395	0.681572	0.680736	0.69888	0.158899	0.335096	0.250525
															0.398588	0.418995	0.407401	0.678772	0.685817	0.752811	0.284792	0.451333	0.412199
															0.291877	0.294887	0.299832	0.684095	0.720135	0.700058	0.125625	0.340427	0.306439
															0.256419	0.26645	0.313461	0.60349	0.597023	0.698233	0.639755	0.69856	0.662417
															0.237999	0.271211	0.283031	0.758053	0.775965	0.793308	0.526554	0.523106	0.533471
															0.300714	0.290744	0.340763	0.680535	0.669386	0.69179	0.350538	0.468293	0.40849
															0.322158	0.310439	0.336532	0.626877	0.681006	0.771575	0.288705	0.440288	0.427815
															0.24558	0.270548	0.321478	0.697842	0.700596	0.792397	0.490886	0.547392	0.522273
															0.249695	0.321946	0.323067	0.657484	0.661883	0.717856	0.273325	0.370429	0.385971
															0.321833	0.337867	0.349832	0.705351	0.719743	0.788725	0.168008	0.291816	0.258694
															0.289414	0.327322	0.349701	0.718113	0.756544	0.808736	0.200799	0.425202	0.396378
															0.298432	0.360047	0.360791	0.629125	0.66291	0.707133	0.123381	0.258209	0.258514
															0.264054	0.301735	0.314655	0.668632	0.642071	0.662874	0.394333	0.461637	0.471481
															0.312298	0.307195	0.320893	0.699281	0.698641	0.769364	0.517595	0.545441	0.596684
															0.381355	0.393715	0.43777	0.388116	0.421164	0.363897	0.139197	0.351901	0.299933
															0.363351	0.375652	0.410229	0.654765	NaN	NaN	0.33235	0.399028	0.425429
															0.374021	0.381305	0.414267	0.355937	0.351065	0.332812	0.627083	0.616526	0.598097
															0.379503	0.380968	0.459958	0.744618	0.742548	0.781684	0.212636	0.417807	0.381091
															0.300217	0.385069	0.466975	0.772895	0.795556	0.74808	0.132524	0.685618	0.673867
															0.325487	0.36344	0.404375	0.735524	0.752067	0.7523	0.196851	0.335105	0.334052
															0.424321	0.46372	0.529447	0.752948	0.788475	0.799964	0.468725	0.49907	0.447335
																		0.703376	0.747668	0.759768	0.443247	0.489973	0.482589
																		0.770501	0.805621	0.817534	0.323668	0.454209	0.435913
																		0.740506	0.767155	0.778355	0.293368	0.371883	0.350219
																		0.692457	0.744475	0.806871	0.469352	0.475109	0.481191
																		0.736005	0.759181	0.759943	0.362566	0.373964	0.362374
																		0.744923	0.77704	0.797179
																		0.740677	0.730014	0.800559
																		0.74553	0.767534	0.813444
																		0.726192	0.759396	0.759925
																		0.721619	0.746617	0.752895
																		0.759057	0.763333	0.801164
																		0.784769	0.807878	0.827261
																		0.6593	0.711126	0.768971
																		0.679573	0.680568	0.696411
																		0.714924	0.746641	0.75493
																		0.743392	0.749522	0.762915
																		0.490439	0.515329	0.511868
																		0.631843	0.646305	0.722739
																		0.741074	0.771805	0.775146
																		0.765632	0.791588	0.786544
																		0.449225	0.546463	0.521763
																		0.694839	0.677198	0.66892
																		0.663218	0.646001	0.761515
																		0.693977	0.700158	0.712743
																		0.743975	0.741195	0.721184
																		0.702257	0.708713	0.70424
																		0.716863	0.708218	0.759113
																		0.717377	0.714638	0.730604
																		0.731468	0.699245	0.772263
																		0.731701	0.685147	0.715964
																		0.6786	0.672024	0.703753
																		0.609115	0.613986	0.650688
																		0.768383	0.732039	0.740839
																		0.543637	0.550653	0.61292
																		0.695937	0.710358	0.688359
																		0.753239	0.776032	0.77768
																		0.666716	0.663442	0.703083
																		0.660348	0.68933	0.784649
																		0.619204	0.634746	0.656322
																		0.553397	0.586988	0.664905
																		0.595326	0.595172	0.644207
																		0.557706	0.590901	0.638364
																		0.400444	0.432477	0.525943
																		0.421653	NaN	NaN
																		0.628054	0.64244	0.72608
																		0.647597	0.710491	0.748761
																		0.461165	0.504446	0.630489
																		0.413643	0.498352	0.580519
																		0.403576	0.404458	0.4518
																		0.642793	0.655637	0.655122
																		0.618357	0.638564	0.743005
																		0.556163	0.602562	0.685127
																		0.609659	0.649537	0.698957
																		0.742652	0.771137	0.798721
																		0.570197	0.631107	0.645943
																		0.683742	0.732142	0.723337
																		0.519404	0.537792	0.641076
																		0.337074	0.461314	0.478956
																		0.668226	NaN	NaN
																		0.549579	NaN	NaN
																		0.396834	0.338141	0.409494
																		0.556741	0.526045	0.53653
																		0.482384	NaN	NaN
																		0.378249	0.381901	0.385421
																		0.490862	0.501077	0.560142
																		0.443309	0.414335	0.443936
																		0.199886	NaN	NaN
																		0.626477	NaN	NaN
																		0.468927	NaN	NaN
																		0.583962	NaN	NaN
																		0.668816	NaN	NaN

## Sheet: Fig5
Receptive field nonlinearity and response decorrelation values for cell pairs (panel d); NaN indicates lack of receptive field or subunits, e.g., because grating stimulus was not available in all recordings
ON parasol		OFF parasol		ON midget		OFF midget		Transient-OΝα		Transient-OFFα		Sustained-OΝα		Sustained-OFFα
receptive field nonlinearity	response decorrelation	receptive field nonlinearity	response decorrelation	receptive field nonlinearity	response decorrelation	receptive field nonlinearity	response decorrelation	receptive field nonlinearity	response decorrelation	receptive field nonlinearity	response decorrelation	receptive field nonlinearity	response decorrelation	receptive field nonlinearity	response decorrelation
1.1771	0.0992281	0.837728	0.176202	2.78443	0.374853	1.08465	0.634224	NaN	-0.592022	NaN	-0.747728	NaN	0.366541	NaN	0.762948
1.21734	0.0539318	1.30419	0.664027	1.19974	0.190397	1.65267	0.94908	NaN	-0.266688	NaN	-0.183273	NaN	0.384215	NaN	1.16245
1.40818	0.409806	3.45277	0.279849	1.12842	0.086699	1.24639	1.4938	NaN	0.847115	NaN	-0.524149	NaN	0.446232	NaN	1.1039
1.39968	-0.33325	1.04795	0.7433	0.969384	0.0504918	1.1735	0.826341	NaN	0.686638	NaN	0.0335425	NaN	-0.204572	NaN	0.987594
1.42806	-0.37271	1.1457	1.23112	1.2091	0.699956	1.29574	0.630907	NaN	0.706792	NaN	-0.508591	NaN	-0.261922	NaN	1.15862
1.24553	-0.957149	0.933347	1.03678	1.15142	0.341917	0.934125	0.758633	NaN	0.74218	NaN	-0.468531	NaN	-0.648208	NaN	0.674761
1.50851	0.288115	1.3062	0.9529	1.52328	0.514622	1.25685	1.09315	NaN	0.856812	NaN	-0.184742	NaN	0.740944	NaN	0.397595
1.41133	-0.708988	1.93381	0.373402	1.25549	1.24821	1.24692	0.518257	NaN	0.300362	NaN	-0.221547	NaN	1.01662	NaN	0.81133
1.60344	-0.25174	0.937016	-0.00232786	1.11822	0.510772	361.091	1.34848	NaN	0.363158	NaN	-0.247938	NaN	1.47664	NaN	-0.296206
1.19101	0.300125	0.784831	0.559422	1.0106	0.671304	1.0042	0.801994	NaN	-0.171043	NaN	-0.428205	NaN	0.389616	NaN	0.261485
0.987738	0.265916	0.786291	0.546507	1.05387	0.0255259	1.34995	0.800738	NaN	0.999669	NaN	-0.295228	NaN	0.958126	NaN	0.9949
1.25914	0.485377	1.6314	0.831133	1.26434	0.360046	1.38961	0.574114	NaN	0.752355	NaN	-0.350286	NaN	0.142571	NaN	0.299599
1.16613	-0.06977	0.75369	0.999314	1.31684	1.10964	361.091	1.61612	NaN	0.680472	NaN	-0.153243	NaN	1.35685	NaN	0.486857
1.21678	-0.163471	0.8197	0.717866	0.917152	0.955915	1.20761	0.817322	NaN	0.669389	NaN	-0.0924382	NaN	0.522102	NaN	0.366494
1.06479	-0.373927	0.565816	0.688414	1.17748	1.44795	1.13463	1.21862	NaN	0.47713	NaN	-0.525098	NaN	0.0553161	NaN	0.975151
1.28044	0.217651	0.817459	1.32056	1.10512	-0.970374	1.30159	0.679489	NaN	0.106609	NaN	-0.792579	NaN	0.565806	NaN	0.441982
1.17844	-0.547981	1.03107	0.48752	1.39307	1.032	1.22098	1.36866	NaN	0.0471167	NaN	-0.77005	NaN	0.463079	NaN	0.709609
1.28062	-0.107563	0.667342	0.142856	1.71701	0.486266	1.13588	0.615617	NaN	0.276482	NaN	-0.788701	NaN	0.584559	NaN	1.12926
1.0563	-0.309757	0.600132	1.23667	1.01557	0.375698	1.11225	-0.320521	NaN	0.91491	NaN	-0.431193	NaN	0.342946	NaN	0.0585629
1.2379	-0.0562941	4.19291	0.428129	1.21311	1.02347	361.091	1.05153	NaN	1.00059	NaN	-0.446633	NaN	0.205665	NaN	0.902218
1.31062	-0.0261023	1.03666	0.877982	1.19844	0.396428	1.29762	1.61625	NaN	0.948908	NaN	-0.0223069	NaN	0.310924	NaN	0.630623
1.29941	-0.14201	1.07984	0.275209	1.01068	-0.0125702	1.72377	1.02544	NaN	0.779252	NaN	-0.941963	NaN	0.877027	NaN	0.967883
1.09608	-0.383769	0.729444	0.263062	1.45197	0.624435	1.54579	0.786094	NaN	0.925701	NaN	-0.190838	NaN	0.194817	NaN	-0.404278
1.28823	-0.136371	1.20444	0.55355	1.03699	-0.844368	1.16869	0.569927	NaN	0.682981	NaN	-0.728638	NaN	0.485706	NaN	0.0307336
1.19147	-0.735414	1.63858	0.566759	1.0676	1.01347	361.091	2.03322	NaN	0.880411	NaN	-0.852141	NaN	0.431423	NaN	1.14935
1.25542	-0.784851	0.772486	0.536622	NaN	0.795121	0.989795	1.17601	NaN	0.996825	NaN	-0.558298	NaN	-0.345225	NaN	1.28185
1.13356	0.429015	0.470671	0.646677	8.70912	0.940267	1.02025	1.80629	NaN	1.1061	NaN	-0.595778	NaN	0.913579	NaN	0.713851
2.0793	0.00773388	2.00498	0.758862	NaN	0.914356	0.801777	0.746802	NaN	0.413372	NaN	-0.381715	NaN	-0.000379537	NaN	1.29482
1.5894	-0.0903524	2.51084	0.936654	0.9854	1.0452	0.977431	0.927521	NaN	1.09994	NaN	-0.533428	NaN	1.62824	NaN	1.49864
1.43223	0.0431803	1.96798	0.916629	1.2006	0.957005	0.832696	0.839634	NaN	0.462622	NaN	-0.293804	NaN	0.837328	NaN	1.65912
1.64505	-0.284391	2.03735	0.605604	1.43359	0.672727	0.88701	0.423837	NaN	-0.530432	NaN	-0.160759	NaN	1.04887	NaN	1.06124
1.43078	-0.355331	4.06871	0.180412	8.70912	0.991381	0.898358	0.248855	NaN	0.574103	NaN	-0.512611	NaN	-0.137938	NaN	1.11291
2.34636	-0.294293	2.40558	0.220978	0.979639	0.953801	0.874041	1.54449	NaN	0.596426	NaN	-0.145025	NaN	0.854903	NaN	1.08587
1.39333	-0.0421275	1.81001	0.492322	1.07517	0.738076	0.872721	0.732439	NaN	0.939096	NaN	-0.622422	NaN	0.624557	NaN	0.402172
1.60948	-0.0933981	1.02385	0.495932	1.16938	0.623333	1.08745	0.409484	NaN	0.788331	NaN	-0.031047	NaN	0.228236	NaN	-0.0471415
1.22741	0.00701383	0.714122	0.900974	1.32876	0.71592	0.873512	1.02396	NaN	0.613673	NaN	-0.258108	NaN	0.388699	NaN	0.676982
1.94051	0.115924	0.955685	0.38574	1.05837	1.00596	0.998988	1.46485	NaN	0.728847	NaN	-0.875852	NaN	0.502874	NaN	0.162428
1.53059	0.137475	1.22853	0.84667	0.956957	0.94455	0.881639	0.369483	NaN	0.865691	NaN	-0.501059	NaN	0.458361	NaN	0.596288
1.50086	-0.00607453	0.690947	0.202137	1.17918	1.17772	0.976736	-0.170892	NaN	0.528525	NaN	-0.850208	NaN	0.282797	NaN	1.07295
1.32738	-0.101571	0.577519	0.485688	0.906895	-0.525536	0.91814	0.452752	NaN	0.669785	NaN	-0.570009	NaN	1.46785	NaN	0.715082
1.35751	-0.127206	0.791463	0.0866349	1.04929	0.693507	1.05841	0.577615	NaN	0.862292	NaN	-0.108383	NaN	0.864052	NaN	0.0719137
1.77656	0.0603337	1.01834	0.335383	1.25814	0.556302	0.929901	-0.159301	NaN	0.549329	NaN	-0.513955	NaN	1.02403	NaN	0.563455
1.38621	-0.371682	1.56145	0.888756	0.890243	0.40686	0.925025	-0.322685	NaN	0.908458	NaN	-0.489444	NaN	0.648327	NaN	0.841781
1.54024	-0.13659	0.775692	-0.13368	1.11935	0.818864	1.28883	0.832641	NaN	0.0920912	NaN	-0.663691	NaN	1.54817	NaN	0.435313
1.30251	0.218719	0.676009	0.680199	1.04756	0.533183	0.853181	1.76117	NaN	0.144219	NaN	-0.056437	NaN	0.95765	NaN	1.17769
1.39105	0.17148	0.822509	0.750544	0.680586	0.881326	0.977167	0.755497	NaN	0.421731	NaN	-0.491802	NaN	0.790303	NaN	1.14486
1.24255	-0.0861266	0.995793	0.763374	1.28169	0.541438	0.98231	0.372864	NaN	0.0694769	NaN	-0.723128	NaN	1.86234	NaN	1.0345
1.22833	-0.0455086	0.62585	0.420234	0.909359	0.838606	0.894292	-0.0840527	NaN	0.367933	NaN	-0.655329	NaN	1.82679	NaN	0.911709
1.21448	0.496633	0.500003	0.54436	0.992605	1.32603	1.03404	1.80489	NaN	0.58463	NaN	-0.272663	NaN	1.77689	NaN	1.1573
1.55518	0.0330911	1.24556	0.837457	1.00869	0.186404	1.37453	0.411648	NaN	0.779027	NaN	-0.525359	NaN	1.06422	NaN	1.15169
1.82668	-0.211159	0.935438	0.854173	0.8837	0.312991	1.08323	0.815394	NaN	0.720823	NaN	0.0274054	NaN	1.70625	NaN	0.296564
1.41644	0.166862	0.736268	0.281242	0.996985	0.811077	1.14086	1.10593	NaN	0.768176	NaN	-0.156024	NaN	1.35552	NaN	1.45261
1.42341	0.073126	1.14804	0.239795	1.11112	-0.126167	1.01825	0.618437	NaN	0.643616	NaN	-0.0930777	NaN	1.60567	NaN	1.76096
1.26839	0.458083	0.815738	0.779397	1.64556	0.314231	1.24603	1.1305	NaN	0.623591	NaN	0.152457	NaN	1.46539	NaN	1.6282
1.32315	0.288292	0.344157	0.881473	1.24405	1.0009	1.34142	1.5987	NaN	0.360648	NaN	-0.204535	NaN	1.54811	NaN	1.30502
1.35172	0.267872	1.03805	0.302737	1.0515	0.0193513	1.42969	-0.169947	NaN	0.562029	NaN	0.30752	NaN	1.38201	NaN	0.0614454
1.22542	0.142342	1.01427	0.79959	0.939073	0.653456	1.3063	0.727666	NaN	0.656223	NaN	-0.0619932	NaN	1.35132	NaN	0.487611
1.10292	0.604068	1.06352	0.33184	1.07627	-0.0714862	1.401	0.997252	NaN	0.3185	NaN	-0.27544	NaN	1.07729	NaN	0.210941
1.14278	-0.361719	1.25178	0.669131	1.23957	0.145437	1.35161	1.42447	NaN	0.242536	NaN	-0.00603973	NaN	1.71062	NaN	0.377318
1.09371	0.352869	1.31822	0.290251	1.26632	0.831775	1.63062	-0.0512973	NaN	0.161529	NaN	-0.3184	NaN	1.8479	NaN	0.316119
1.58286	0.284582	1.02376	0.649973	0.893117	0.917724	1.11589	1.20121	NaN	0.276476	NaN	0.0507029	NaN	1.59565	NaN	0.114162
1.14218	0.0797127	1.09121	1.00732	1.19284	0.96811	1.22488	1.15478	NaN	0.566394	NaN	0.215926	NaN	1.09274	NaN	0.305334
1.31271	0.430385	1.06866	0.843541	1.08214	0.221069	1.34355	0.563063	NaN	0.27719	NaN	-0.0982106	NaN	1.70401	NaN	0.373977
1.12628	0.0659674	1.0648	-0.133275	1.14311	0.968583	1.22067	1.68212	NaN	0.842843	NaN	0.0623478	NaN	0.867457	NaN	0.234236
1.19157	-0.176501	1.03297	0.0427314	1.48417	0.599729	1.04281	1.21784	NaN	0.409442	NaN	-0.147809	NaN	1.30996	NaN	0.785751
1.19791	-0.559416	1.04758	0.153289	0.988898	0.612571	1.12628	1.52454	NaN	0.161965	NaN	0.219247	NaN	2.01881	NaN	0.774222
0.972239	-0.18928	1.03956	0.332019	1.07403	1.01801	1.81943	0.0668634	NaN	0.710238	NaN	-0.634864	NaN	-0.216843	NaN	1.71706
1.41236	0.560813	1.04733	-0.226135	1.12944	0.229135	2.11925	0.508441	NaN	0.698883	NaN	-0.83241	NaN	1.6635	NaN	1.13364
1.34558	0.905806	1.25532	0.0360021	0.882755	0.400117	1.3902	1.17278	NaN	0.872515	NaN	-0.571319	NaN	1.17178	NaN	0.920631
1.27113	0.138881	1.27977	0.11208	1.23995	0.873785	1.26965	-0.0812419	NaN	0.413777	NaN	-0.560848	NaN	0.342582	NaN	0.913816
1.17285	0.306083	1.04353	0.470384	0.924003	-0.11739	1.13189	0.822629	NaN	0.647042	NaN	-0.181441	NaN	0.872922	NaN	0.529237
1.92295	0.0670547	1.11636	0.364802	0.966416	0.902518	1.78716	1.0007	NaN	0.614295	NaN	-0.348046	NaN	0.517731	NaN	0.324936
1.36007	0.263621	1.09029	0.505515	0.880385	-0.0772271	0.933396	1.21273	NaN	0.599929	NaN	-0.456082	NaN	0.753412	NaN	0.424519
1.512	-0.775814	1.07199	-0.437892	1.00725	0.691561	1.06863	1.36709	NaN	0.547452	NaN	0.00975682	NaN	0.611753	NaN	-0.0998225
1.23085	0.660531	1.0181	-0.265669	1.07336	0.235259	1.02318	0.51761	NaN	0.567106	NaN	-0.57237	NaN	1.10111	NaN	-0.00401638
1.39941	-0.445292	1.05052	0.0254027	1.2898	0.425934	1.06537	0.856468	NaN	0.70172	NaN	0.128565	NaN	1.01071	NaN	-0.0342002
1.41332	-1.92866	1.0639	0.211686	1.15941	1.3189	1.14331	1.32122	NaN	0.472168	NaN	-0.123245	NaN	1.06885	NaN	0.0367737
1.03027	-0.508206	1.22215	0.175447	1.0061	0.612586	1.28283	0.41098	NaN	0.611976	NaN	-0.688339	NaN	1.02773	NaN	0.279905
1.16606	0.0670628	1.2439	0.386025	0.896146	0.59222	1.20082	0.55315	NaN	0.403457	NaN	-0.22467	NaN	1.1297	NaN	0.43633
1.21407	0.223794	1.0468	-0.229733	0.997279	-0.366247	1.20995	1.49545	NaN	0.717802	NaN	-0.785373	NaN	1.13518	NaN	0.36779
1.08278	-0.138465	1.09776	0.252591	1.12439	0.147245	1.12652	1.30602	NaN	0.892866	NaN	-0.301505	NaN	0.127453	NaN	0.593131
1.70341	0.501525	1.06943	0.765183	1.14509	1.07238	1.21757	0.115004	NaN	0.24167	NaN	-0.0258683	NaN	0.410302	NaN	0.246803
1.17816	0.476086	1.06502	0.00742331	0.859874	1.01467	1.09274	0.998495	NaN	0.224145	NaN	-0.115131	NaN	0.990936	NaN	0.578511
1.30387	0.147738	1.03611	-0.085256	1.07207	1.32034	1.13328	1.1587	NaN	0.640831	NaN	0.0620859	NaN	0.167829	NaN	0.887275
1.165	0.315646	1.06127	0.58875	1.00262	-0.619662	1.13466	1.2867	NaN	0.0935978	NaN	-0.4136	NaN	0.331366	NaN	0.708614
1.20013	-0.425754	1.23973	-0.0591949	1.09057	0.835159	1.24371	1.90908	NaN	0.701303	NaN	-0.00708432	NaN	0.638189	NaN	0.702176
1.26534	-0.189262	1.28881	-0.238641	1.15269	0.738021	1.12202	1.33337	NaN	0.334414	NaN	-0.51301	NaN	0.248005	NaN	0.372561
0.99523	-0.334027	1.05978	0.282287	0.949789	0.759083	1.05259	2.00497	NaN	0.887378	NaN	-0.2183	NaN	-1.47188	NaN	-0.278749
1.10891	0.683586	1.11003	0.334044	1.03413	1.18464	2.21265	0.378373	NaN	0.992541	NaN	-0.507664	NaN	-0.0425144	NaN	-0.13195
1.03663	0.131443	1.08272	0.316667	1.12338	0.781388	1.31251	0.416391	NaN	0.908063	NaN	-0.156175	NaN	0.324357	NaN	0.978813
1.51167	0.797554	1.08975	-1.02051	0.915087	0.200323	1.21743	1.66856	NaN	0.25711	NaN	-0.246224	NaN	-1.09409	NaN	0.305931
1.14659	0.733376	1.0193	-0.231251	1.07097	0.833564	1.20791	1.10521	NaN	0.600634	NaN	0.0925752	NaN	-0.876528	NaN	-0.666665
1.23576	0.413176	1.05455	-0.436189	0.921534	-0.393585	1.07538	1.44671	NaN	0.880856	NaN	0.115145	NaN	-0.597526	NaN	0.251749
0.988392	0.588989	1.58046	-0.102336	0.999987	0.387265	1.60516	0.0128675	NaN	0.4918	NaN	0.241577	NaN	-0.0694091	NaN	0.0302176
1.12897	-0.127742	1.23105	0.271585	0.872235	0.738263	0.967687	1.06596	NaN	-0.472422	NaN	0.199568	NaN	-0.837063	NaN	0.490418
1.22798	0.145223	1.33496	-0.178233	0.923967	0.543111	0.833742	1.19059	NaN	0.30135	NaN	-0.280489	NaN	0.0392858	NaN	0.910238
0.886978	-0.118698	1.29758	0.392972	1.18504	0.679441	0.851252	0.566934	NaN	0.574403	NaN	-0.0578014	NaN	-0.299281	NaN	0.511734
1.03781	0.0561187	1.3192	-0.381592	1.02171	1.17705	0.916974	1.21978	NaN	0.244225	NaN	0.243981	NaN	1.05284	NaN	0.459226
1.66722	0.197036	1.2511	-0.282592	0.876633	0.694165	0.740812	1.18589	NaN	0.0195844	NaN	-0.0428947	NaN	-0.577933	NaN	1.13739
1.15506	-0.424668	1.27128	0.318381	0.755213	0.895417	0.996377	1.07136	NaN	0.0649444	NaN	0.228565	NaN	-0.139769	NaN	0.841536
1.25136	-0.0386451	1.25922	0.305655	0.911875	0.345811	1.02941	1.20078	NaN	0.314646	NaN	0.374319	NaN	-0.0295809	NaN	0.974398
1.07828	-0.479627	1.31235	0.199835	0.931417	0.605444	0.885926	1.44805	NaN	0.267927	NaN	-0.074887	NaN	-0.201427	NaN	0.531021
1.18678	-0.298533	1.26971	0.13439	0.997232	1.0045	0.90149	1.40282	NaN	0.556806	NaN	-0.290997	NaN	0.0546199	NaN	0.539429
1.19951	-1.10005	1.33874	-0.664307	0.767624	1.08064	0.799445	0.277025	NaN	0.865852	NaN	0.0892403	NaN	0.191673	NaN	0.136858
0.961051	-0.658655	1.2367	-0.324285	0.931582	1.21299	0.924418	0.589892	NaN	0.789746	NaN	-0.045064	NaN	0.3122	NaN	1.29534
1.40947	0.682424	1.27258	-0.361681	0.921062	-0.086238	0.889147	0.40181	NaN	0.451493	NaN	-0.509668	NaN	-0.326214	NaN	0.626641
1.02753	0.482368	1.09801	0.185048	0.920139	0.951124	0.859581	1.0386	NaN	0.337886	NaN	-0.538402	NaN	-0.501842	NaN	0.0303587
1.12802	0.039603	1.03187	0.722867	1.03038	0.653509	0.828985	0.856551	NaN	0.498096	NaN	-0.346748	NaN	-0.750959	NaN	-0.0855452
0.950965	0.308781	1.06672	0.164662	0.838157	0.858329	0.891388	1.05984	NaN	0.560504	NaN	-0.658606	NaN	-0.711706	NaN	-0.096861
1.05807	-0.378627	1.03803	-0.0295674	0.913548	1.15975	1.19632	1.38454	NaN	0.130946	NaN	-0.584082	NaN	0.0560953	NaN	0.209983
1.11235	-0.343061	1.07453	0.611387	0.986169	0.711033	0.983539	0.450809	NaN	0.413197	NaN	-0.140386	NaN	-0.40842	NaN	-0.262624
0.853337	-0.386204	1.14844	0.471975	0.791112	-0.281284	0.943088	1.12606	NaN	0.750644	NaN	-0.490861	NaN	1.62522	NaN	0.342885
1.67663	0.0653075	1.16244	0.0775287	0.965823	1.19618	0.921301	0.95989	NaN	-0.471066	NaN	0.00518733	NaN	-0.578824	NaN	0.52989
1.79643	0.0966172	1.12471	-0.289827	0.783625	0.0255521	0.82881	0.346684	NaN	-0.0866648	NaN	-0.226256	NaN	-0.194504	NaN	0.41237
1.53702	0.492549	1.18713	0.772845	0.877011	0.958072	1.40896	1.01603	NaN	0.292232	NaN	-0.511525	NaN	-0.0141728	NaN	0.530499
1.65076	0.0995859	1.08009	0.367461	1.22109	0.939924	0.956964	1.20018	NaN	0.0286644	NaN	-0.309185	NaN	0.0473046	NaN	0.401128
1.71555	-0.804732	1.04789	0.654704	1.41692	0.134937	1.03067	0.982896	NaN	0.605907	NaN	-0.66676	NaN	0.287351	NaN	0.442378
1.26131	0.00139285	1.12421	0.137737	1.24443	0.468249	1.08196	0.836875	NaN	0.942553	NaN	-0.329283	NaN	0.64925	NaN	0.555502
1.30561	0.326037	1.07477	0.167772	1.10696	0.78306	1.15983	0.882448	NaN	0.801991	NaN	-0.169499	NaN	0.518902	NaN	0.708227
1.09259	0.0127825	1.10543	0.200435	0.873998	0.794015	1.00625	1.0646	NaN	0.536789	NaN	-0.171525	NaN	0.448727	NaN	0.0497897
1.1718	0.132844	1.073	0.635643	1.02855	0.552514	1.17458	0.808664	NaN	0.333992	NaN	0.243666	NaN	0.348092	NaN	0.378713
1.17667	-0.15106	1.33507	0.671224	1.30683	0.597022	1.25103	0.603773	NaN	0.63982	NaN	-0.720628	NaN	0.25397	NaN	0.541131
0.90307	0.161629	0.669561	0.804347	1.25892	0.476788	1.1342	0.909473	NaN	0.302217	NaN	-0.0155175	NaN	0.179231	NaN	1.2743
1.20741	0.594559	1.21218	0.502223	0.842184	0.739255	1.03589	1.16087	NaN	0.0015698	NaN	-0.219705	NaN	0.557215	NaN	0.564763
1.28179	0.191679	1.40793	0.977462	1.09085	0.724199	1.15071	1.26566	NaN	0.625214	NaN	-0.394102	NaN	-0.300337	NaN	0.178763
1.35275	-0.51484	1.22082	0.27325	1.00641	0.83712	1.04456	0.471231	NaN	1.04471	NaN	-0.556547	NaN	1.41478	NaN	1.27447
1.0329	-0.0605229	1.1623	0.751796	1.11297	-0.0940015	1.23959	0.014049	NaN	-0.273454	NaN	-0.371974	NaN	0.891213	NaN	1.02417
1.12722	0.235342	1.34685	0.62762	1.22363	0.342309	1.04481	1.28417	NaN	-0.223801	NaN	-0.198109	NaN	0.296323	NaN	0.825362
1.09748	0.111516	1.19522	0.943866	0.939215	0.517148	1.06525	0.489143	NaN	0.0588818	NaN	-0.129661	NaN	1.29729	NaN	1.08125
0.854374	0.240525	1.20622	0.208005	1.05327	0.379914	1.42993	0.534526	NaN	0.476632	NaN	-0.0549931	NaN	1.0802	NaN	0.625744
1.20374	-0.319684	1.3878	0.945333	1.23017	0.725789	1.19158	1.31139	NaN	0.569531	NaN	-0.328647	NaN	1.27292	NaN	0.536886
0.985009	0.116838	0.684998	0.650595	0.898914	0.733459	1.10858	0.60028	NaN	0.339189	NaN	-0.0882553	NaN	1.24742	NaN	1.5109
0.882921	-0.126011	1.18306	0.385844	1.10133	0.0445631	1.10521	0.187021	NaN	0.453533	NaN	-0.516547	NaN	1.25607	NaN	1.06031
1.13604	0.290759	1.40335	0.482698	0.923321	0.130541	1.01987	0.974737	NaN	0.117084	NaN	-0.275705	NaN	1.47961	NaN	0.49825
1.3066	0.0794241	1.26761	0.63527	1.02335	-0.306314	1.10188	0.878204	NaN	0.579945	NaN	-0.152165	NaN	1.6649	NaN	-0.339802
1.07137	0.00377532	1.292	0.239251	1.52243	0.353467	0.85559	0.816943	NaN	0.275246	NaN	-0.326824	NaN	1.60642	NaN	0.029789
1.05624	0.746386	1.08721	0.32717	1.62618	0.858007	0.958507	0.995187	NaN	0.160244	NaN	-0.261412	NaN	1.16364	NaN	0.917971
1.12858	0.653939	1.15961	0.441996	1.09262	0.105981	0.785786	1.11554	NaN	0.47575	NaN	0.371977	NaN	1.51	NaN	0.247922
1.47686	0.613762	1.13858	0.738095	0.925341	0.605198	0.893612	0.357696	NaN	0.747256	NaN	-1.03026	NaN	-0.41482	NaN	-0.0787107
1.49424	0.324686	1.18252	0.216784	1.19214	-0.0723286	1.00357	0.704684	NaN	-0.391332	NaN	0.0032845	NaN	-0.0953882	NaN	0.254983
1.4128	0.28712	0.689767	0.669838	1.13968	0.0709923	1.01737	0.91086	NaN	-0.197858	NaN	-0.26042	NaN	-0.321104	NaN	0.157316
1.0505	0.27953	0.814672	0.179637	1.15386	0.670997	0.777744	0.854593	NaN	0.461306	NaN	-0.37159	NaN	0.310526	NaN	0.455419
1.22546	-0.116899	0.656122	0.610877	0.914516	0.821217	0.840127	0.624487	NaN	0.87913	NaN	-0.307136	NaN	0.00784795	NaN	0.491952
1.17396	-0.922271	0.40875	0.569026	1.24653	0.76712	1.03801	0.960414	NaN	0.876725	NaN	-0.259296	NaN	-0.0119697	NaN	-0.163332
1.29582	0.0911599	0.658707	0.780652	1.15001	0.322145	0.902457	0.998539	NaN	0.519884	NaN	-0.404791	NaN	0.784116	NaN	-0.0656406
1.68026	-1.16807	0.594883	0.166308	1.31896	0.790852	1.05345	1.42736	NaN	0.345809	NaN	-0.158911	NaN	0.271283	NaN	0.340777
1.30613	-0.272041	0.525237	-0.203055	1.23178	0.428372	0.954408	0.898821	NaN	0.588144	NaN	-0.416148	NaN	0.237629	NaN	-0.109348
1.19687	0.502204	0.648528	0.335674	0.984983	0.541752	0.856704	0.985058	NaN	0.524732	NaN	-0.465888	NaN	-0.217168	NaN	1.07455
2.10925	0.326835	1.21078	0.959237	1.10481	0.933061	1.25829	0.687267	NaN	-0.183677	NaN	-0.12662	NaN	0.885883	NaN	-0.147973
1.53875	0.349051	1.08558	0.325301	1.22884	0.37466	0.786266	0.929565	NaN	0.514206	NaN	-0.501516	NaN	-0.13259	NaN	0.176654
1.13766	0.408546	1.06011	0.934731	1.00043	0.724102	1.23442	0.962131	NaN	0.453069	NaN	-0.102391	NaN	-0.116289	NaN	0.536874
1.29083	0.297354	1.00136	0.173404	1.07912	0.809169	0.917641	0.355178	NaN	-0.0254732	NaN	0.0271859	NaN	-0.417346	NaN	0.370207
1.3366	-0.0434814	1.07506	0.725665	0.929767	-0.237031	0.835733	0.983437	NaN	0.119662	NaN	-0.0703232	NaN	0.605233	NaN	0.604977
1.39168	0.122786	1.06852	0.628455	1.10094	0.487049	0.753493	0.791996	NaN	0.0495582	NaN	0.136176	NaN	-0.276076	NaN	0.939337
1.78083	-0.102489	1.09889	0.814304	3.06917	0.561967	0.988093	0.263923	NaN	0.16395	NaN	-0.175802	NaN	-0.214473	NaN	-0.00760759
1.29966	-0.258069	1.2266	1.00121	1.518	0.710327	0.956852	1.17283	NaN	0.413821	NaN	0.0283803	NaN	0.0674435	NaN	0.325807
1.15201	-0.110394	1.18659	0.606796	1.11515	0.485194	0.933099	0.804302	NaN	0.148534	NaN	-0.591921	NaN	-0.0216178	NaN	0.810811
1.29423	-0.42396	1.05466	0.784583	1.25914	0.158446	1.05587	0.602374	NaN	0.47764	NaN	-0.603346	NaN	0.147731	NaN	0.373294
1.21169	-1.09657	1.25417	0.662502	3.93233	0.0312946	1.00464	1.1984	NaN	0.396382	NaN	-0.60976	NaN	0.0486816	NaN	-0.0755775
1.40566	-0.340306	1.08331	0.750823	8.59567	0.613357	1.07773	0.875342	NaN	0.345152	NaN	-0.332638	NaN	0.103517	NaN	0.648852
1.77475	-0.305757	1.27994	0.436336	1.04424	0.816399	0.930099	-0.166614	NaN	0.457065	NaN	-0.819131	NaN	0.0566296	NaN	0.256668
1.62341	-0.285432	0.941312	0.761307	1.96715	0.685465	1.1409	0.209003	NaN	0.552391	NaN	-0.589941	NaN	-0.131758	NaN	0.425013
1.17983	0.548669	1.06057	0.293228	1.40157	0.538808	0.977509	0.320631	NaN	0.111503	NaN	-0.363301	NaN	0.845251	NaN	0.4727
1.24385	-0.282066	1.00064	0.747648	1.48364	0.291642	1.09343	1.21633	NaN	0.949792	NaN	-0.43125	NaN	0.70462	NaN	0.366126
1.56483	-0.0523156	1.06024	0.491031	2.08412	0.467379	1.02134	0.459034	NaN	0.830961	NaN	-0.317011	NaN	0.747556	NaN	0.493388
1.40957	0.625305	1.1186	0.668947	1.14288	0.557739	0.943359	0.535167	NaN	0.266491	NaN	-0.596172	NaN	-0.0241085	NaN	0.160382
1.25824	0.649568	0.928106	0.704392	1.3636	0.356549	1.15743	0.705364	NaN	0.0582636	NaN	-0.368998	NaN	0.830095	NaN	0.683391
1.56332	0.558184	0.930396	0.572038	1.53573	0.907605	0.945498	1.31943	NaN	0.460569	NaN	-0.393794	NaN	-0.269961	NaN	0.794281
2.29367	0.201534	0.943734	0.44213	1.3854	1.15052	1.0689	1.02562	NaN	0.498664	NaN	-0.176151	NaN	-0.0838964	NaN	1.49997
1.50119	0.359428	1.01897	0.538412	1.88797	-0.122654	1.05785	0.605641	NaN	0.0976651	NaN	-0.596906	NaN	0.336207	NaN	0.791856
1.32577	0.844373	0.999462	0.320384	1.13028	0.171464	0.958211	-0.0589325	NaN	0.385857	NaN	-0.590595	NaN	-0.118904	NaN	1.125
1.55678	-0.0356109	1.03438	0.768242	1.3732	0.119136	1.10493	1.06507	NaN	0.940317	NaN	-0.233157	NaN	-0.0840554	NaN	0.873404
1.72571	-0.409459	1.07776	0.374072	1.3795	0.749139	1.01085	1.49109	NaN	0.548937	NaN	-0.750523	NaN	-0.835888	NaN	0.699117
1.61541	-0.0381633	1.07482	0.681033	1.05651	0.23935	1.00171	0.807377	NaN	0.545334	NaN	0.118686	NaN	-0.650182	NaN	1.42383
2.0192	-0.828183	1.06682	0.110502	1.1564	0.842977	1.13359	0.657949	NaN	0.242052	NaN	-0.630812	NaN	0.120672	NaN	0.94914
2.16902	-0.203959	1.05685	0.715158	1.34656	0.802079	1.31134	0.777333	NaN	-0.0391496	NaN	-0.598236	NaN	-0.404452	NaN	0.709714
1.37589	0.572971			1.45569	0.185178	1.11828	1.59386	NaN	-0.0648451	NaN	0.0517852	NaN	-0.442543	NaN	0.24086
2.64127	0.273765			1.0632	0.497029	0.987998	0.293592	NaN	0.469268	NaN	-0.612392	NaN	-0.813172	NaN	0.229224
1.02502	0.56191			1.54241	-0.087309	1.14489	0.246509	NaN	0.3656	NaN	-0.096008	NaN	0.251238	NaN	0.378483
1.23918	0.734226			1.1613	0.767002	1.01791	0.412887	NaN	0.354079	NaN	-0.122276	NaN	-0.4446	NaN	0.764472
1.24793	0.610451			1.30685	0.637902	1.14638	0.629353	NaN	0.896939	NaN	-0.659229	NaN	0.124667	NaN	0.958338
2.38114	0.361604			1.96934	0.438977	0.991736	0.140319	NaN	-0.240015	NaN	-0.545696	NaN	0.395064	NaN	0.174985
1.58451	0.45299			1.11554	0.641098	1.02101	-0.319308	NaN	0.832791	NaN	-0.145407	NaN	-0.391502	NaN	0.543698
1.08589	0.266			1.31552	0.405222	1.48845	0.638554	NaN	0.936115	NaN	-1.04315	NaN	-0.63211	NaN	1.01511
1.28373	-0.032701			1.29546	0.613947	1.00712	1.81897	NaN	0.80356	NaN	-0.0117299	NaN	-0.0474257	NaN	0.238126
1.14236	-0.762166			1.10079	0.910466	1.10701	1.09464	NaN	0.128202	NaN	-0.177307	NaN	0.195322	NaN	-0.200829
2.29532	0.0529329			1.5861	0.584508	1.26085	0.68267	NaN	0.851762	NaN	-0.746087	NaN	-0.248025	NaN	0.15943
11.7602	-1.71035			1.23827	0.631536	0.991683	0.314851	NaN	1.01305	NaN	-0.344334	NaN	0.519468	NaN	0.159329
1.84208	-0.299661			1.19388	0.15375	1.07694	1.54308	NaN	0.610402	NaN	-0.1584	NaN	-0.72454	NaN	0.136855
1.13529	0.134637			0.878207	0.680118	0.920271	0.959146	NaN	0.834985	NaN	-0.663447	NaN	0.382038	NaN	0.514193
1.52812	0.578827			1.06583	0.337392	1.23476	1.17303	NaN	0.623933	NaN	-0.166327	NaN	-0.367379	NaN	0.45674
1.18126	0.483106			1.17798	0.468296	1.10705	1.00494	NaN	0.710239	NaN	-0.642881	NaN	0.0281859	NaN	0.34086
1.29355	-0.0357448			1.20232	0.303832	361.091	0.142776	NaN	-0.0813137	NaN	-0.733709	NaN	-0.459674	NaN	0.449973
1.63765	-0.330501			0.880109	0.637654	0.906425	1.24354	NaN	0.694071	NaN	0.0611501	NaN	0.319629	NaN	0.472306
1.33143	0.604698			1.13504	0.689161	1.3365	1.27456	NaN	1.02573	NaN	-0.082289	NaN	0.431317	NaN	0.467211
1.06171	0.0103774			1.01885	0.582508	1.11421	1.16337	NaN	0.762268	NaN	0.12163	NaN	0.718846	NaN	0.312142
1.20018	-0.5843			1.15863	0.594515	361.091	1.1958	NaN	-0.210967	NaN	-0.178593	NaN	-0.283559	NaN	0.683962
1.4202	-0.420158			1.21153	0.450203	1.05952	1.53668	NaN	0.371738	NaN	-0.569704	NaN	0.252414	NaN	0.330775
1.28234	-0.835168			0.938091	0.835094	1.04924	1.46704	NaN	0.162153	NaN	0.144979	NaN	-0.315086	NaN	0.0737485
1.81924	-0.766228			1.14241	0.971048	361.091	0.499855	NaN	-0.0712228	NaN	-0.827561	NaN	0.602885	NaN	-0.0195954
1.58981	-0.821407			1.10503	0.192528	361.091	0.639212	NaN	0.27905	NaN	-0.65718	NaN	0.395268	NaN	0.422887
1.14222	-0.710833			0.928576	0.223643	1.21203	1.09103	NaN	0.855199	NaN	0.0180321	NaN	-0.255764	NaN	0.430588
2.04623	0.533755			1.13563	1.09962	1.6628	0.664495	NaN	0.158476	NaN	-0.704321	NaN	-0.666947	NaN	-0.0349178
1.4548	0.08215			0.930179	-0.239177	0.924793	1.54414	NaN	0.35815	NaN	-0.0831281	NaN	-0.0686927	NaN	0.436616
1.63061	0.27134			1.02855	0.313374	8.29601	0.694724	NaN	-0.477993	NaN	-0.182043	NaN	-0.858335	NaN	0.421439
1.55915	-0.145786			0.930845	0.530784	1.05665	1.1032	NaN	0.271486	NaN	-0.654188	NaN	-0.00416984	NaN	0.102548
1.11392	0.495215			0.922673	0.456928	1.07648	1.15861	NaN	0.764577	NaN	-0.544376	NaN	-0.313471	NaN	0.790977
1.23281	0.198097			1.07958	0.305248	1.35791	0.739819	NaN	0.614661	NaN	-0.281261	NaN	-0.210062	NaN	0.759579
1.36152	-0.126816			0.761071	0.575007	0.884009	0.76661	NaN	0.0616321	NaN	-0.827672	NaN	-0.308785	NaN	0.458553
1.31232	0.355238			0.972677	0.231617	1.08096	0.97715	NaN	0.229656	NaN	-0.0365519	NaN	0.266948	NaN	0.301692
1.94502	-0.0464497			0.913101	0.612082	1.02333	1.0808	NaN	1.00443	NaN	0.0532332	NaN	-0.550743	NaN	0.588111
1.65875	0.33458			0.959421	0.862791	0.973499	1.2447	NaN	0.361198	NaN	0.168847	NaN	-0.430158	NaN	0.327669
1.20738	0.358716			1.029	0.490056	1.01975	1.16832	NaN	0.860333	NaN	-0.796049	NaN	-0.515519	NaN	0.0429957
2.19085	0.00938256			0.837117	0.748587	0.934065	0.978042	NaN	0.781231	NaN	-0.0206574	NaN	0.0955181	NaN	1.2695
1.60168	-0.18758			0.933433	0.757821	1.14186	-0.0725243	NaN	0.317489	NaN	-0.729572	NaN	-0.134981	NaN	1.45927
1.539	0.372799			0.93463	0.799389	0.948332	0.451962	NaN	0.833571	NaN	-0.696954	NaN	0.158242	NaN	0.76916
1.36873	0.193683			0.752042	0.754311	1.13246	1.15099	NaN	0.94484	NaN	0.24583	NaN	0.472158	NaN	1.02418
1.44612	-0.153795			0.995899	0.456474	1.11738	0.597104	NaN	0.627651	NaN	0.105961	NaN	0.208894	NaN	1.20049
1.47678	-0.359866			0.810011	0.245836	0.930241	0.656389	NaN	0.948767	NaN	0.262216	NaN	0.562793	NaN	0.286184
1.29002	-0.293119			0.88618	0.294206	1.09312	0.0888785	NaN	1.03899	NaN	0.0685845	NaN	0.723187	NaN	0.930596
1.97158	-0.0559875			1.178	-0.0262788	1.22546	0.530374	NaN	0.279812	NaN	-0.229658	NaN	0.525404	NaN	0.766588
1.93442	-0.348455			1.29503	0.680542	1.27212	0.82828	NaN	-0.163754	NaN	-0.663639	NaN	0.856203	NaN	0.184675
1.16739	-0.337053			0.877934	0.653386	1.17291	0.808632	NaN	0.677465	NaN	-0.141298	NaN	0.543022	NaN	0.766892
1.43625	0.233003			1.02214	0.868659	1.10762	1.02867	NaN	0.362132	NaN	-0.716891	NaN	0.488661	NaN	1.08618
1.93111	0.355667			1.02483	0.145503	1.13661	1.19143	NaN	0.716245	NaN	-0.15622	NaN	0.861341	NaN	1.31414
1.61404	0.343534			1.12495	0.5844	1.53319	0.509173	NaN	0.56396	NaN	-0.365497	NaN	-0.725396	NaN	0.911747
1.81611	0.297921			1.26001	0.46588	1.09694	0.830981	NaN	0.899024	NaN	-0.652536	NaN	-0.404565	NaN	0.689532
2.05337	-0.175309			0.954658	0.504123	1.09059	1.26905	0.968605	-0.535983	NaN	-0.51767	NaN	-0.106939	NaN	1.01131
1.88036	-0.119024			1.06183	0.820527	1.55211	0.666757	0.911123	0.695472	NaN	-0.279597	NaN	0.236327	NaN	0.239346
2.42578	-0.0483628			1.12982	0.583767	1.31858	1.04132	1.04334	-0.012525	NaN	-0.530272	NaN	-0.55331	NaN	0.655614
2.35321	-0.194563			0.919925	1.05759	1.2734	0.0619524	0.976892	0.789766	NaN	-0.441453	NaN	0.346595	NaN	0.902982
1.60224	0.182906			1.14586	0.627643	1.10769	0.876315	0.996595	0.360396	NaN	-0.153335	NaN	0.347955	NaN	0.281196
3.54406	0.310705			0.870764	0.111427	1.06318	0.7138	1.00434	-0.109316	NaN	-0.380942	NaN	-0.134269	NaN	0.410773
1.35338	0.749534			1.04856	0.296471	1.28797	1.21771	0.972097	-0.211282	NaN	-0.102961	NaN	-0.574445	NaN	0.25707
1.29187	0.494608			1.37863	0.573044	1.37553	1.09169	0.823238	0.429456	NaN	-0.272314	NaN	-0.286547	NaN	0.925424
1.55396	-0.182921			0.917512	0.80202	0.984008	0.986969	0.988792	-0.223042	NaN	-0.383008	NaN	0.0212084	NaN	0.63531
1.59647	0.591283			1.23748	0.757329	1.17008	1.28814	0.880756	0.494969	NaN	-0.670197	NaN	-0.257629	NaN	0.358542
3.0035	0.169881			1.02522	0.512488	1.04076	1.71264	0.93683	0.0138342	NaN	-0.373892	NaN	0.291214	NaN	0.813902
1.90673	0.523052			1.18801	0.201017	1.3328	0.579236	0.923695	-0.0574711	NaN	-0.493695	NaN	0.0872567	NaN	0.12746
1.4115	0.832365			1.69264	0.549923	1.07565	1.25883	0.894803	-0.376584	NaN	-0.239282	NaN	-0.199416	NaN	1.24936
1.35176	-0.179028			1.03746	0.627332	1.02483	1.0864	1.00302	0.174242	NaN	-0.207666	NaN	-0.259671	NaN	0.673807
1.21508	-0.211344			1.22967	0.810683	3.32267	0.976895	0.787709	-0.197501	NaN	-0.507564	NaN	-0.127787	NaN	1.03567
1.20152	0.341405			1.13553	0.845535	1.85468	1.15745	0.901543	0.212061	NaN	-0.786258	NaN	-0.176234	NaN	0.743856
1.74769	0.314941			1.05047	1.12336	1.19386	0.43055	0.889268	-0.0145975	NaN	0.0808461	NaN	0.271196	NaN	0.692298
1.71727	0.053311			1.46585	0.377647	1.23703	1.09205	0.846648	0.0131098	NaN	-0.135856	NaN	0.0377324	NaN	0.324059
2.05983	0.175465			0.928869	0.221666	0.95939	1.48856	0.956033	0.272568	NaN	-0.158001	NaN	-0.175242	NaN	1.33301
1.10902	0.76038			1.14041	0.229191	361.091	0.95542	1.08658	-0.492561	NaN	-0.0460113	NaN	-0.329901	NaN	0.745061
1.16974	0.619961			0.971285	0.447624	0.881439	1.20711	1.05517	-0.348433	NaN	-0.391181	NaN	0.166357	NaN	1.06575
1.35699	0.4956			1.63379	0.200318	1.48666	0.965207	1.03256	-0.387537	NaN	-0.373214	NaN	0.523283	NaN	0.0973099
1.33268	0.299246			1.18744	0.770239	1.25604	1.11326	0.915601	0.321475	NaN	-0.347432	NaN	0.519364	NaN	1.5682
1.77248	0.650218			1.28626	0.794667	361.091	1.19033	0.87001	0.349009	NaN	-0.904008	NaN	0.162434	NaN	0.0687908
1.59924	0.38823			2.57438	0.25644	0.9895	1.34087	0.818854	-0.0412388	NaN	-0.80549	NaN	0.271601	NaN	-0.478819
1.21411	0.274376			1.06525	0.44145	0.945437	1.46618	1.01444	-0.182703	NaN	-0.230576	NaN	0.157564	NaN	0.533971
2.16592	0.593419			1.49995	0.437271	361.091	0.142599	0.989002	0.00929541	NaN	-1.12532	NaN	0.225225	NaN	0.864734
2.0694	0.330514			1.28267	0.831846	361.091	0.765081	0.932268	-0.731561	NaN	-0.199647	NaN	0.105283	NaN	0.243002
7.56711	0.0521638			1.09118	0.284746	1.17743	0.82107	0.888301	0.10467	NaN	-0.787833	NaN	0.197667	NaN	1.03884
2.07325	0.246221			1.61317	0.577579	1.57342	0.57993	0.926297	0.845479	NaN	-0.178774	NaN	-0.062159	NaN	0.358769
1.56279	0.5599			1.30145	0.495094	0.92951	1.39476	0.919804	0.334449	NaN	-0.227852	NaN	0.050519	NaN	-0.424189
1.35927	0.370468			1.19735	0.0285954	1.92706	0.449646	1.05473	0.756974	NaN	-0.245839	NaN	-0.403103	NaN	0.574453
2.06832	0.363243			0.923131	0.548005	1.04106	0.0804366	1.00061	0.233768	NaN	-0.193408	NaN	0.377706	NaN	0.470791
1.64872	-0.119543			0.858132	0.580886	1.01678	-0.00409776	1.05169	0.271534	NaN	-0.38069	NaN	0.517443	NaN	0.462494
1.33185	0.149403			0.903993	1.089	1.15298	1.32124	0.952575	0.139544	NaN	-0.190686	NaN	-0.21926	NaN	1.19041
1.75834	0.652483			1.11147	0.672473	1.02342	0.345787	0.994366	0.541774	NaN	-0.529519	NaN	1.19554	NaN	0.404819
11.7602	0.259806			0.823922	0.815576	0.958826	0.325502	0.92084	0.196028	NaN	-0.335347	NaN	0.618313	NaN	0.59522
1.59889	0.473133			0.901449	0.317231	1.02476	0.86539	1.03504	0.755077	NaN	-0.167126	NaN	-0.252788	NaN	0.468849
1.89559	0.595475			0.985188	0.920751	0.886203	1.27172	0.960747	0.748133	NaN	-0.536847	NaN	0.268902	NaN	0.469392
1.44576	0.212867			0.777805	0.885565	1.04902	1.16208	0.971786	0.487909	NaN	-0.714783	NaN	-0.154456	NaN	0.764072
1.61224	0.629556			0.923648	0.293986	1.03655	0.702182	0.917765	0.760234	NaN	-0.382246	NaN	1.72314	NaN	0.66238
1.54071	0.967465			0.791184	0.951668	0.955221	0.129998	0.928224	0.535344	NaN	-0.953673	NaN	-0.149295	NaN	0.507836
				0.868577	0.104549	1.14732	0.982045	1.17216	1.03564	NaN	-0.0637272	NaN	0.567342	NaN	0.940511
				1.07593	0.936787	1.04946	0.503718	0.959994	1.01965	NaN	-0.574395	NaN	1.18097	NaN	0.534087
				1.18297	0.862318	1.2297	1.12325	1.04095	0.949383	NaN	-0.78426	NaN	0.469111	NaN	0.100678
				1.6585	0.523773	1.18204	-0.0600778	0.846898	1.07503	NaN	-0.170743	NaN	1.18362	NaN	0.194431
				1.00948	0.861343	1.07927	0.79155	1.01289	0.570701	NaN	-0.17578	NaN	1.74098	NaN	1.38771
				1.17984	0.679183	1.71914	0.733694	0.944993	0.275047	NaN	-0.076383	NaN	0.671422	NaN	0.854531
				1.15997	0.684138	1.03643	1.16752	1.02762	0.731166	NaN	-0.0391809	NaN	0.967854	NaN	0.950853
				1.01522	0.911419	1.12618	0.865495	0.890786	0.431865	NaN	-0.415624	NaN	-1.48118	NaN	1.33459
				1.30516	0.824529	1.22805	0.734351	1.10709	0.346572	NaN	-0.662124	NaN	0.417152	NaN	0.706904
				0.993768	0.730868	1.04015	-0.38796	1.18742	0.214021	NaN	-0.446392	NaN	0.903552	0.845805	-0.265615
				1.08749	0.476416	1.22894	1.03248	0.953065	0.493344	NaN	-0.255681	NaN	-0.0753605	0.852686	-0.0565955
				1.11078	1.051	1.00826	1.2109	1.00932	0.422925	NaN	-0.0752708	NaN	1.24762	0.778538	0.37087
				1.24735	0.370885	1.02005	0.634834	0.927043	-0.287641	NaN	0.107048	NaN	0.306206	0.900863	-0.0147135
				0.910998	0.178913	1.00467	0.0566919	0.968464	0.0389353	NaN	0.114102	NaN	0.910451	0.857304	0.341821
				1.05671	0.62317	1.51452	0.789114	1.40679	0.0797692	NaN	-0.430162	NaN	-0.80157	0.926899	0.793128
				1.04697	0.360361	0.994687	1.60121	1.40679	0.53876	NaN	-0.243941	NaN	-0.367267	0.850664	0.46238
				0.957963	0.601761	1.11624	1.76546	1.40679	0.461767	NaN	0.0821617	NaN	0.146989	0.801204	0.859553
				1.11207	0.606778	1.10184	0.278786	1.15905	0.617954	NaN	-0.430423	NaN	-0.490189	0.905824	0.409182
				0.944126	0.298636	1.00152	0.00755073	NaN	0.289303	NaN	-0.296664	NaN	-0.0798423	0.719024	1.3418
				1.00832	0.760866	1.14196	1.41819	NaN	0.569234	NaN	0.425521	NaN	0.255755	0.846144	-0.0466191
				1.41456	0.842321	1.02756	1.08164	1.17246	0.421889	NaN	0.492644	NaN	-0.175298	0.865105	0.439494
				0.989624	0.834459	1.06239	1.37891	NaN	0.621903	NaN	-0.255647	NaN	-0.370521	0.900008	0.00157358
				1.11671	0.643536	361.091	0.980707	1.17246	0.756873	NaN	0.0573437	NaN	1.50152	0.856369	0.515508
				1.40222	1.12799	361.091	1.04958	1.17246	0.00186485	NaN	-0.773331	NaN	1.41888	0.866585	0.657423
				0.993331	0.949959	1.16512	0.517823			NaN	-0.685058	NaN	-0.344467	0.766169	0.324632
				1.22722	0.827683	1.2323	1.47324			NaN	-1.11725	NaN	-0.243173	0.812629	0.640911
				0.961298	0.764445	0.89065	1.02866			NaN	-0.789977	NaN	0.110268	0.859681	0.308814
				1.10594	0.494861	361.091	0.747471			NaN	-0.872478	NaN	1.52751	0.914895	1.61185
				1.08599	0.371363	0.999937	0.762867			NaN	-0.836305	NaN	0.288843	0.912087	0.20198
				1.82581	0.422812	1.08159	0.779731			NaN	-0.702339	NaN	0.824041	0.918998	-0.252219
				1.23827	0.530921	0.998968	1.24783			NaN	-0.397302	NaN	1.08842	0.899429	0.178155
				1.33923	0.15414	1.17933	0.568782			NaN	-0.189103	NaN	1.04423	0.827898	0.482991
				2.33019	0.564556	1.10161	1.01855			NaN	0.150212	NaN	1.2567	0.896111	0.554358
				1.1499	0.255847	0.993143	-0.311095			NaN	0.215165	NaN	1.5399	0.861258	0.80178
				1.29193	0.251782	0.997293	1.35761			NaN	-0.797263	NaN	0.511746	0.872243	0.701989
				0.964482	0.527913	1.42435	1.09329			NaN	-0.37736	NaN	1.81969	0.945526	1.50054
				0.971777	-0.236366	0.993924	1.63018			NaN	0.363745	NaN	0.252135	0.894848	0.21715
				0.862811	0.619495	1.09018	1.87345			NaN	-0.681256	NaN	0.469182	0.860119	0.255522
				1.00254	0.768964	1.11131	0.412828			NaN	-0.519829	NaN	1.41216	0.874359	0.439186
				0.855716	0.454012	0.927997	-0.361655			NaN	0.295448	NaN	0.583587	0.860114	0.667112
				0.903048	0.795635	0.940972	1.59712			NaN	0.217473	NaN	0.795175	0.844263	0.556573
				1.10622	0.893275	361.091	0.798887			NaN	-0.416457	NaN	0.639892	0.859573	0.567078
				0.986885	1.00867	1.57224	0.471975			NaN	0.174672	NaN	1.60643	0.920168	1.54031
				1.19046	-0.0530878	1.6372	0.463532			NaN	-0.588474	NaN	-0.220232	0.909045	0.0732452
				1.03505	0.670689	1.30063	0.531295			NaN	-0.754209	NaN	0.173747	0.893221	0.682956
				1.02099	-0.139095	5.91945	0.513679			NaN	-0.811536	NaN	0.995846	0.896616	0.359407
				1.02617	0.566844	1.38195	0.791547			NaN	-0.499628	NaN	0.780341	0.96498	0.68947
				1.2275	1.05028	1.06328	1.34494			NaN	-0.157804	NaN	0.400406	0.962533	0.806646
				0.959374	0.157011	1.11102	1.39097			NaN	-0.907613	NaN	0.799549	0.988131	1.39588
				1.10966	1.05864	1.76136	0.447773			NaN	-0.710244	NaN	0.625789	0.840959	0.18429
				1.16253	0.875244	1.11952	1.15057			NaN	-0.447038	NaN	0.293803	0.776531	0.160822
				0.828643	0.376418	1.06828	0.930222			NaN	-0.227873	NaN	-0.26254	0.846754	0.660133
				0.920923	0.604988	2.13285	1.03299			NaN	0.143283	NaN	1.49568	0.858563	0.510598
				0.969636	0.820881	1.11745	-0.160673			NaN	-0.880728	NaN	1.09966	0.916223	1.22326
				1.11195	0.366205	1.24312	1.1643			NaN	-0.692683	NaN	0.58625	0.746834	0.085901
				0.854702	0.52007	1.12929	1.66873			NaN	0.220589	NaN	0.0449176	0.911812	0.557654
				0.912127	0.624389	0.93926	0.0845874			NaN	-0.702948	NaN	1.31522	0.944409	0.465734
				0.794141	0.995574	0.81718	0.476658			NaN	-0.793037	NaN	0.623133	0.971242	0.731525
				0.898423	0.296962	0.91295	0.346109			NaN	0.0511624	NaN	1.3358	0.863282	0.295637
				0.876422	-0.0465426	0.900349	1.04006			NaN	0.104105	NaN	0.508995	0.676422	0.370359
				0.857284	1.00609	1.06186	1.39531			NaN	-0.168667	NaN	0.927768	0.749144	0.771323
				0.904699	0.662253	0.949286	0.476076			NaN	-0.16593	NaN	0.362807	1.0978	0.371301
				1.02905	0.375351	0.947791	1.28161			NaN	-0.454369	NaN	1.41466	1.10454	0.964401
				1.05754	0.138988	0.952985	0.599278			NaN	-0.620986	NaN	0.758524	0.861751	1.04865
				0.976815	0.631849	0.877711	0.201624			NaN	-0.912036	NaN	0.592352	0.988364	0.627908
				0.866128	0.504261	0.879915	0.343793			NaN	-0.487059	NaN	1.27541	1.1177	0.0334857
				0.832465	0.177872	0.806486	-0.308391			NaN	-0.97042	NaN	0.766612	0.979892	0.218083
				0.858457	0.109075	0.806402	-0.282771			NaN	-0.730647	NaN	0.65718	0.955278	0.795506
				0.989334	0.348394	0.712863	-1.03963			NaN	-0.47106	NaN	1.19028	0.868185	1.27051
				0.963058	0.603477	0.714513	0.720478			NaN	0.282354	NaN	1.25824	0.904629	0.725978
				1.0894	0.367082	0.868705	0.67204			NaN	0.424293	NaN	1.40952	0.986472	0.701157
				1.36163	0.916973	0.794469	1.34633			NaN	-0.785482	NaN	0.982186	0.956108	0.146218
				0.907879	0.794145	0.891458	1.19818			NaN	-0.843634	NaN	0.844955	0.921336	0.107383
				0.955081	0.91473	0.877262	0.662624			NaN	0.432166	NaN	1.0919	0.821072	0.401045
				1.12427	-0.270588	0.769294	1.45952			NaN	-0.548873	NaN	0.890292	0.81438	0.563806
				1.18345	-0.000453915	0.927232	0.703145			NaN	-0.823461	NaN	1.06543	0.999269	0.39571
				1.51946	0.722684	0.801283	0.302108			NaN	-0.111851	NaN	0.788709	0.944553	0.419436
				1.42144	0.267841	0.807114	0.674999			NaN	0.219716	NaN	1.00028	0.953587	0.793883
				1.89926	0.657292	0.784314	0.230548			NaN	-0.0427438	NaN	0.817372	0.920387	0.721709
				1.71449	0.498244	0.764196	0.189764			NaN	-0.251656	NaN	1.30606	0.91112	-0.34916
				0.787239	0.513834	0.600078	-0.182822			NaN	-0.179116	NaN	0.848517	0.862433	0.272558
				1.07167	0.515071	0.772996	0.437259			NaN	-0.337933	NaN	0.5578	0.90725	0.554094
				1.10043	0.042841	0.709246	0.864772			NaN	-0.610464	NaN	0.382386	0.859981	0.0463152
				1.07549	0.728109	0.816676	0.826313			NaN	-0.0669408	NaN	1.008	0.801759	0.54801
				1.16979	0.715211	0.771043	0.91332			NaN	-0.99525	NaN	0.640667	0.763347	0.310746
				1.39648	0.152306	0.720946	0.871863			NaN	-0.671993	NaN	1.2134	0.88101	0.915436
						0.784078	0.745375			NaN	0.413554	NaN	-0.127543	0.768961	0.630305
						0.640619	0.389522			NaN	0.22705	NaN	1.14261	0.837914	0.72211
						0.660237	0.232102			NaN	-0.743517	NaN	0.48719	0.632346	0.814456
						0.647957	-0.110779			NaN	-0.547001	NaN	0.917431	0.679973	0.623195
						0.622447	0.49591			NaN	0.276073	NaN	0.133994	1.01426	0.364933
						0.574228	0.400404			NaN	-0.535348	NaN	0.303892	0.915775	0.523182
						0.860573	0.659188			NaN	-0.666084	NaN	0.806321	0.952427	0.754093
						0.924009	1.36566			NaN	-0.452293	NaN	0.615223	0.759252	0.864205
						0.893436	0.500608			NaN	-0.0268631	NaN	0.912876	0.891472	0.598801
						0.883757	1.22097			NaN	-0.0174535	NaN	0.961353	0.900323	0.629691
						0.859883	0.371009			NaN	-0.458365	NaN	0.879503	0.814748	0.615512
						0.740461	0.194586			NaN	-0.147695	NaN	1.19719	0.820902	1.01442
						0.787255	0.163514			NaN	-0.341174	NaN	0.528307	0.777973	0.961633
						0.734348	0.0766786			NaN	-0.377977	NaN	0.209688	0.74712	0.377399
						0.717888	0.320907			NaN	0.0751087	NaN	0.76253	0.992507	0.508406
						0.455241	-1.09896			NaN	-1.21359	NaN	1.19466	0.885561	0.951328
						0.881926	0.64777			NaN	0.101172	NaN	1.68084	0.334619	0.172828
						0.815056	0.404632			NaN	0.121893	NaN	0.318167	0.624292	0.87474
						0.699867	0.361971			NaN	-0.499284	NaN	0.460008	0.530673	0.574773
						0.840412	0.262379			NaN	-0.581401	NaN	0.0302906	0.928872	0.515145
						0.753475	0.305443			NaN	0.192273	NaN	-0.0389297	0.607579	0.107283
						0.766716	0.577834			NaN	-0.273794	NaN	0.0867273	1.04349	-0.274236
						0.750962	0.240959			NaN	-0.420827	NaN	1.80563	0.667292	0.447456
						0.739722	0.497333			NaN	-0.493133	NaN	-0.175452	0.918449	0.631131
						0.58991	0.205255			NaN	-0.172237	NaN	0.353551	0.722518	0.1579
						0.987607	1.17606			NaN	0.20559	NaN	1.16331	0.908386	0.0999761
						0.828923	0.858412			NaN	-0.343843	NaN	0.899315	0.916209	0.680609
						0.963976	0.799315			NaN	-0.130634	NaN	1.24293	0.931642	0.715401
						0.813043	0.807129			NaN	-0.212688	NaN	1.79711	0.791663	0.657046
						0.920605	1.29305			NaN	-0.41135	NaN	0.312741	0.909403	0.668346
						0.882106	1.40128			NaN	-0.161023	NaN	1.4334	0.963323	0.178395
						0.817516	1.35945			NaN	-1.08464	NaN	-0.698478	0.878619	0.625924
						0.793822	1.70369			NaN	-0.325644	NaN	0.477432	0.834645	0.856331
						0.829091	0.856776			NaN	-0.12232	NaN	0.856069	0.856192	1.13125
						0.905179	0.380096			NaN	0.24434	NaN	0.0919077	0.975327	0.636434
						0.77985	0.183065			NaN	0.0132207	NaN	1.05807	0.933	0.685469
						0.816014	-0.0647745			NaN	-0.0586431	NaN	0.596548	0.775446	0.216805
						0.794104	0.249691			NaN	-0.0177717	NaN	1.25272	0.856875	0.784311
						0.888766	0.0451195			NaN	-0.328925	NaN	-0.604851	0.83566	0.406516
						0.691226	-0.720861			NaN	-0.449212	NaN	0.11241	0.785862	0.753584
						0.886632	0.725371			NaN	-0.0373974	NaN	0.64647	0.854837	0.732649
						0.831758	0.970345			NaN	-0.765184	NaN	-0.410085	0.822768	0.660083
						0.816543	1.06892			NaN	0.0541995	NaN	-0.0272328	0.870634	0.635115
						0.797506	0.468142			NaN	0.0062074	NaN	0.574595	0.669348	0.832291
						0.772979	0.54629			NaN	0.109152	NaN	0.135004	0.826832	1.43762
						0.599445	1.29292			NaN	-0.361624	NaN	-0.789116	0.862821	0.971293
						0.788764	0.155922			NaN	-0.818662	NaN	0.236453	0.811878	0.549252
						0.815934	0.565126			NaN	0.194494	NaN	1.92291	0.960714	0.772688
						0.771831	0.461404			NaN	0.162847	NaN	-0.0598814	0.750108	0.9193
						0.801385	0.585536			NaN	-0.447236	NaN	0.222175	0.920876	0.366057
						0.622776	0.0905269			NaN	0.00583294	NaN	0.581247	0.794734	0.754819
						0.706452	0.0757362			NaN	0.247269	NaN	0.643159	0.863061	0.269628
						0.705262	0.0636194			NaN	0.156602	NaN	0.961442	0.698113	0.342282
						0.618671	0.463246			NaN	-0.363393	NaN	1.07322	0.798747	0.70016
						0.542347	-0.242689			NaN	0.0568526	NaN	0.392021	0.887545	0.109326
						0.704236	0.846441			NaN	-0.175236	NaN	1.6299	1.02201	0.118005
						0.713247	0.706418			NaN	-0.0428062	NaN	-0.239151	0.895302	0.485661
						0.613983	0.243689			NaN	0.00216489	NaN	0.554081	0.852664	1.18257
						0.542771	0.130161			NaN	-0.215177	NaN	0.766187	0.831964	0.822221
						0.611554	0.409991			NaN	-0.376027	NaN	0.21171	1.04914	0.873027
						0.523622	0.344531			NaN	-0.512064	NaN	0.0646273	0.876907	0.550632
						2.07822	0.451118			NaN	-0.82794	NaN	0.250092	0.629644	1.17958
						3.49145	0.947455			NaN	0.382336	NaN	1.10931	0.680224	0.910438
						1.99048	0.548096			NaN	-0.822149	NaN	-0.474375	0.760676	0.469218
						1.5729	0.16456			NaN	-0.928005	NaN	-0.290711	0.740122	0.653987
						1.55631	0.420236			NaN	-0.344446	NaN	0.667327	0.787073	0.848559
						5.21049	0.86252			NaN	0.0623207	NaN	0.521436	0.879093	0.681152
						1.05554	0.644294			NaN	-0.390665	NaN	0.247724	0.725105	0.633211
						1.49271	0.262983			NaN	-0.470935	NaN	0.187505	0.677451	1.25922
						361.091	0.768962			NaN	-0.392127	NaN	0.350328	0.612419	0.685919
						1.04301	-0.347155			NaN	-0.684531	NaN	-0.122693	0.87749	1.13208
						1.18322	-0.154928			NaN	-0.564298	NaN	1.25424	0.693667	0.497963
						1.64567	0.324518			NaN	-0.307505	NaN	0.34177	0.963889	0.459997
						1.49171	0.791834			NaN	-0.885001	NaN	0.39206	0.753995	1.15397
						1.03647	0.762423			NaN	0.287771	NaN	0.274597	0.879705	0.616657
						1.03986	0.31771			NaN	-0.67057	NaN	0.919345	0.529465	0.574674
						1.21882	0.451091			NaN	-0.877178	NaN	0.800417	0.849643	0.595152
						1.43371	1.00077			NaN	-0.492394	NaN	1.29329	0.799548	0.409372
						0.701025	0.379897			NaN	0.0255427	NaN	0.809301	0.940143	0.637469
						1.12064	0.508521			NaN	-0.0957493	NaN	1.38722	1.20301	0.773384
						1.32528	0.740983			NaN	-0.545349	NaN	-0.470377	0.906587	0.635577
						0.971039	0.208686			NaN	-0.171032	NaN	0.60032	0.818868	1.1317
						1.0262	0.698573			NaN	-0.399102	NaN	0.391661	0.865627	0.882035
						1.22579	0.943898			NaN	-0.363368	NaN	0.122547	1.05426	0.673858
						3.14039	0.913501			NaN	0.287355	NaN	0.553941	0.915409	0.683539
						1.04197	1.19075			NaN	-1.13505	NaN	0.444362	0.842025	0.423312
						1.17599	1.19543			NaN	0.150794	NaN	0.662227	0.78724	0.526105
						1.46084	1.014			NaN	0.403797	NaN	-0.17945	0.913291	0.909566
						0.952529	0.990032			NaN	0.176277	NaN	-0.229685	0.728902	0.365739
						0.976275	0.8108			NaN	-0.273407	NaN	0.628406	0.917441	0.815476
						1.18294	0.496173			NaN	0.102582	NaN	-0.0767021	0.94778	0.974106
						0.825464	0.91535			NaN	0.119481	NaN	0.267217	0.63257	0.892351
						1.0172	1.38946			NaN	-0.00825892	NaN	0.410965	0.676418	0.915381
						1.29622	0.714068			NaN	-0.0080813	NaN	0.640701	0.859365	0.685387
						0.965165	0.285366			NaN	-0.115803	NaN	-0.752299	0.913996	0.794662
						1.3432	0.467163			NaN	-0.21576	NaN	1.33593	0.857829	0.421802
						2.48726	0.655596			NaN	-0.179649	NaN	1.47634	0.957386	0.751584
						0.983809	0.360685			NaN	-0.761425	NaN	1.3022	0.819999	1.10429
						1.25336	0.94453			NaN	-0.462327	NaN	0.846572	0.943105	0.819782
						1.48864	0.889709			NaN	-0.153974	NaN	1.2926	0.751807	0.76183
						0.821347	-0.464232			NaN	-0.724322	NaN	0.131219	0.887662	0.822255
						1.0402	-0.343844			NaN	-0.645019	NaN	1.22584	0.498933	0.68255
						1.12126	0.23752			NaN	-0.720767	NaN	0.109516	1.00304	0.808719
						0.94468	0.217185			NaN	-0.794692	NaN	1.23657	0.761082	0.180302
						0.840974	0.688142			NaN	-0.568654	NaN	0.454882	0.72857	0.770735
						0.793693	0.436958			NaN	-0.268955	NaN	0.973512	0.755751	0.7655
						0.693537	0.639235			NaN	-0.472777	NaN	1.21182	0.958771	0.498998
						1.03277	0.8522			NaN	-0.358392	NaN	1.22488	0.81137	0.404222
						0.698039	-0.395423			NaN	0.163555	NaN	0.68161	0.737376	0.454565
						0.885693	-0.0566292			NaN	-0.260129	NaN	1.18127	0.750746	0.533871
						1.02179	0.546333			NaN	-0.460234	NaN	0.740899	0.730815	0.677193
						1.39328	0.671854			NaN	-0.197671	NaN	0.844139	0.491784	0.762664
						0.92549	0.193178			NaN	-0.506354	NaN	1.23043	0.618929	0.928002
						1.00728	0.802583			NaN	-0.336048	NaN	1.61504	0.873535	0.958735
						1.17344	0.976219			NaN	0.183316	NaN	0.998366	0.759685	0.765028
						0.839823	-0.317578			NaN	-0.861914	NaN	0.653999	0.463162	1.09399
						0.988874	-0.0754767			NaN	-0.484806	NaN	1.58841	0.673683	1.1119
						1.14842	0.273545			NaN	-0.317344	NaN	1.08523	0.817279	0.843689
						0.822735	0.551813			NaN	-0.922041	NaN	0.262783	0.745206	0.705042
						1.02473	0.743594			NaN	-0.180664	NaN	0.794573	0.945284	0.605059
						1.03938	0.684604			NaN	-0.418433	NaN	1.03977	0.773908	0.941517
						0.514158	0.666667			NaN	0.119436	NaN	1.03385	0.889709	0.508246
						0.965324	0.382718			NaN	0.499607	NaN	0.610718	0.714783	0.551853
						2.14944	1.06233			NaN	-0.676347	NaN	0.565395	0.87526	0.916704
						0.820829	0.703619			NaN	0.0758943	NaN	0.976733	1.18159	0.119634
						0.751377	0.760665			NaN	-0.551976	NaN	-1.04466	0.824083	0.456482
						0.704832	0.2446			NaN	0.169214	NaN	0.659059	0.866229	0.585596
						0.763814	-0.0819878			NaN	0.0341065	NaN	0.93697	0.921494	0.582395
						0.882848	0.751284			NaN	0.045865	NaN	0.0598949	1.02947	0.612781
						1.38808	0.712079			NaN	-0.349813	NaN	0.18602	0.968171	0.604796
						0.751978	0.807613			NaN	-0.462167	NaN	0.21984	0.892091	0.85204
						0.88925	0.52915			NaN	-0.269955	NaN	0.75891	0.989826	0.615342
						1.00735	0.950586			NaN	-0.706208	NaN	-0.675126	0.960295	0.618243
						0.928642	1.23878			NaN	-0.720979	NaN	-0.331391	0.583424	0.733638
						1.01417	0.629606			NaN	-0.225671	NaN	0.202999	0.826121	0.781852
						1.12711	0.845443			NaN	-0.388278	NaN	-0.175669	0.999694	0.628302
						0.779228	0.493144			NaN	0.163271	NaN	-0.34055	0.644942	0.130641
						0.959681	0.67421			NaN	-0.182089	NaN	-0.0167459	0.521922	0.73154
						1.07765	0.35205			NaN	-0.547099	NaN	0.12215	0.862202	0.497177
										NaN	-0.0813804	NaN	-0.3249	0.819859	0.85421
										NaN	0.235261	NaN	0.30726	0.836194	0.468516
										NaN	-1.01165	NaN	0.314919	1.00414	0.266802
										NaN	-0.547632	NaN	-0.152923	0.982065	0.671727
										NaN	-0.670038	NaN	0.43895	0.963951	0.601734
										NaN	-0.609908	NaN	0.700203	0.684388	0.202929
										NaN	-0.265441	NaN	1.10145	0.989631	0.73699
										NaN	-0.692165	NaN	-0.347944	0.983057	0.50278
										NaN	-0.48655	NaN	1.13285	0.990447	0.773944
										NaN	-0.464061	NaN	0.60618	1.01705	0.896966
										NaN	-0.418188	NaN	-0.457937	1.16492	0.553577
										NaN	-0.595475	NaN	0.457083	1.05333	0.82489
										NaN	-0.384197	NaN	0.842227	1.03539	0.645512
										NaN	-4.82449e-05	NaN	1.31056	1.0179	1.06313
										NaN	0.00107431	NaN	-0.346176	1.04566	0.587335
										NaN	0.15234	NaN	0.212319	1.04188	0.746724
										NaN	0.0926748	NaN	1.19635	1.14373	0.821922
										NaN	0.528693	NaN	-0.759954	1.02951	1.3421
										NaN	0.331904	NaN	0.0203287	1.21421	0.513681
										NaN	0.307059	NaN	0.450824	0.921548	1.09116
										NaN	0.421985	NaN	0.457668	1.24737	0.59076
										NaN	0.0591142	NaN	-0.329754	1.0219	0.979343
										NaN	0.409806	NaN	1.15716	0.972364	1.24241
										NaN	0.398352	NaN	0.15776	1.11274	0.4932
										NaN	0.458211	NaN	0.965322	1.10505	0.904238
										NaN	0.213845	NaN	0.122955	1.02409	0.210663
										NaN	0.257636	NaN	1.36982	0.944886	0.756389
										NaN	0.289213	NaN	0.690156	0.971948	0.661229
										NaN	-0.33414	NaN	0.902335	0.906786	0.649923
										NaN	-0.417823	NaN	0.562938	0.814009	0.407591
										NaN	-0.133929	NaN	0.888211	1.01787	0.429524
										NaN	-0.301481	NaN	0.0582776	0.984686	-0.143595
										NaN	-0.559729	NaN	0.114656	0.82917	0.999461
										NaN	-0.129979	NaN	0.684137	0.863202	1.0558
										NaN	-0.631446	NaN	-0.19225	0.868148	0.472454
										NaN	-0.0230985	NaN	0.0299156	0.868597	0.848824
										NaN	-0.0283701	NaN	0.549617	0.830437	1.07184
										NaN	0.220628	NaN	0.190874	0.929395	0.762847
										NaN	0.210539	NaN	1.10223	0.838904	0.750902
										NaN	-0.0682049	NaN	0.157447	0.560825	0.97124
										NaN	-0.107647	NaN	0.18856	0.757942	1.07573
										NaN	0.253431	NaN	-0.362302	0.913808	1.03572
										NaN	0.236279	NaN	1.40449	0.874849	0.873667
										NaN	-0.179513	NaN	1.09649	0.978741	0.303201
										NaN	-0.0326211	NaN	1.0656	0.895769	0.674191
										NaN	0.2045	NaN	0.0987747	0.931241	0.611682
										NaN	-0.193266	NaN	0.975388	0.832591	0.480565
										NaN	-0.0762471	NaN	0.877129	0.899991	0.626484
										NaN	0.0139704	NaN	0.609392	0.787051	0.173401
										NaN	-0.142242	NaN	0.705094	1.01335	0.632281
										NaN	0.121885	NaN	0.833207	0.873846	0.800241
										NaN	0.182103	NaN	0.691875	0.794781	0.831018
										NaN	0.134748	NaN	1.15233	0.835365	0.740854
										NaN	0.36375	NaN	0.0416932	0.842737	0.920102
										NaN	0.2565	NaN	0.440187	0.840874	0.624459
										NaN	-0.166832	NaN	0.638362	0.830805	0.599901
										NaN	0.166561	NaN	1.07805	0.933053	0.839478
										NaN	0.299132	NaN	1.33538	0.805751	0.629147
										NaN	-0.0567457	NaN	0.673763	0.719375	0.617758
										NaN	0.013632	NaN	0.437664	0.680913	0.616649
										NaN	-0.24005	NaN	0.4893	0.909732	0.720562
										NaN	-0.304469	NaN	0.512005	0.868715	1.22398
										NaN	-0.478113	NaN	0.383777	0.954325	0.614907
										NaN	-0.376238	NaN	1.33607	0.842409	0.772928
										NaN	-0.541568	NaN	0.226047	0.894482	0.857348
										NaN	-0.327199	NaN	0.914804	0.752783	0.428642
										NaN	-0.379313	NaN	0.895011	0.838398	1.08895
										NaN	0.299911	NaN	0.918981	0.828507	0.619515
										NaN	-0.643652	NaN	0.857023	0.821685	0.538028
										NaN	-0.655204	NaN	0.532989	0.769198	0.999979
										NaN	0.498273	NaN	0.924019	0.749337	1.02615
										NaN	-0.560661	NaN	0.734553	0.815356	0.833117
										NaN	-0.698462	NaN	0.525961	0.781768	1.12063
										NaN	-1.15219	NaN	0.517292	0.753877	1.1892
										NaN	-0.902248	NaN	-0.154428	0.89346	0.663685
										NaN	0.242121	NaN	0.943147	0.804209	1.16855
										NaN	-0.157375	NaN	0.208337	0.703366	0.675297
										NaN	-1.06828	NaN	0.16109	0.742972	0.591794
										NaN	-1.03019	NaN	0.224741	0.902655	1.19718
										NaN	-0.0788049	NaN	0.487795	0.83976	1.38434
										NaN	-0.480441	NaN	0.168378	0.908306	1.06723
										NaN	-0.866665	NaN	0.374575	0.789556	0.766227
										NaN	0.00818878	NaN	0.718276	0.91306	0.705786
										NaN	-0.0806652	NaN	1.11102	0.767812	1.03891
										NaN	-0.302822	NaN	0.188594	0.860137	0.968302
										NaN	-0.109035	NaN	0.736548	0.940657	0.241395
										NaN	-0.459255	NaN	0.732328	1.00393	0.439699
										NaN	0.0658077	NaN	1.30616	1.00733	0.478878
										NaN	-0.0575391	NaN	0.604238	0.898673	0.906492
										NaN	0.0641184	NaN	-0.0183471	0.937817	0.93745
										NaN	-0.430026	NaN	1.01413	0.893085	0.779154
										NaN	-0.140744	NaN	1.43219	0.965866	0.636592
										NaN	-0.224829	NaN	0.342049	0.970686	0.595039
										NaN	-0.213911	NaN	0.0425631	0.60128	0.515624
										NaN	-0.649087	NaN	0.910032	0.792464	0.583495
										NaN	-0.830134	NaN	0.998238	1.00091	0.633288
										NaN	-0.626421	NaN	0.72637	0.96807	0.783001
										NaN	-0.340775	NaN	0.301792	1.03998	0.484532
										NaN	-0.890799	NaN	0.300657	1.01513	0.970119
										NaN	-0.687747	NaN	0.713461	0.966787	0.320079
										NaN	-0.638885	NaN	0.67123	0.948773	0.757218
										NaN	-0.811828	NaN	-0.428432	1.0108	1.02173
										NaN	-0.524386	NaN	-0.121267	0.897674	0.643288
										NaN	-0.587044	NaN	0.823516	0.828911	0.862436
										NaN	-0.285647	NaN	-0.279485	0.870637	0.629748
										NaN	-0.989416	NaN	-0.204136	0.758393	0.95279
										NaN	-0.533095	NaN	0.691757	0.956649	0.825442
										NaN	-0.602061	NaN	0.545368	0.899758	0.956483
										NaN	-0.933385	NaN	1.0356	0.874084	0.651127
										NaN	-0.352674	NaN	-0.217754	0.593248	0.947043
										NaN	-0.897361	NaN	-0.0127652	0.747196	0.988018
										NaN	-0.424122	NaN	-0.846546	0.890163	0.925947
										NaN	-0.510826	NaN	0.490834	0.853411	0.907251
										NaN	-0.577344	NaN	0.415277	1.02561	0.596917
										NaN	-0.727792	NaN	0.730047	0.910413	0.826862
										NaN	-0.121331	NaN	0.736331	0.928586	0.597446
										NaN	-0.699669	NaN	0.210899	0.756308	0.77144
										NaN	-0.339761	NaN	0.191077	0.891683	0.838448
										NaN	-0.796957	NaN	0.796433	0.68356	0.381238
										NaN	-0.144652	NaN	1.11577	0.43387	0.841982
										NaN	-0.595371	NaN	0.582349	0.493605	0.631066
										NaN	-0.718142	NaN	0.709918	0.795675	0.688708
										NaN	-0.777758	NaN	1.33918	0.896368	0.850474
										NaN	0.378387	NaN	1.25527	0.569796	0.676233
										NaN	-0.42588	NaN	0.749769	0.425786	0.091751
										NaN	0.299872	NaN	0.939826	0.580246	0.922921
										NaN	-0.258283	NaN	1.01482	0.944158	0.426413
										NaN	-0.538835	NaN	0.210413	0.597167	0.487751
										NaN	-0.169108	NaN	0.573158	1.03127	0.417197
										NaN	-0.352765	NaN	0.184816	0.796444	0.343845
										NaN	-0.2167	NaN	0.375048	0.935283	0.643683
										NaN	-0.333286	NaN	-0.123951	0.641412	0.562552
										NaN	-0.337808	NaN	0.430455	0.955386	0.980276
										NaN	0.0496097	NaN	0.149968	0.907144	0.797894
										NaN	-0.211417	NaN	-0.236251	0.4954	0.769587
										NaN	-0.322627	NaN	-0.092637	0.86641	0.689238
										NaN	0.0927802	NaN	0.346193	0.883808	0.943192
										NaN	0.316037	NaN	0.393028	0.703275	0.485776
										NaN	0.348964	NaN	-0.126566	0.459178	0.596072
										NaN	0.266569	NaN	-0.207284	0	0.911049
										NaN	-0.221349	NaN	0.0721144	0.980732	0.783841
										NaN	0.740967	NaN	0.650294	0.721105	0.613128
										NaN	0.373443	NaN	1.04182	0.95996	1.09342
										NaN	-0.27076	NaN	-0.0767073	0.632633	0.741073
										NaN	-0.0441843	NaN	-0.595808	0.945202	0.915013
										NaN	-0.0619414	NaN	0.315804	0.544275	0.562764
										NaN	-0.30365	NaN	0.966659	0.929201	1.00474
										NaN	0.243021	NaN	0.450126	0.644856	0.631663
										NaN	-0.494853	NaN	0.283515	0.823523	0.713337
										NaN	-0.727616	NaN	1.38319	0.961022	0.543576
										NaN	-0.315093	NaN	1.15748	0.670642	0.739254
										NaN	-0.365377	NaN	0.170395	0.572404	0.972645
										NaN	-0.635829	NaN	0.558275	0.610887	1.12821
										NaN	-0.806392	NaN	0.596497	0.898713	0.963351
										NaN	0.242474	NaN	0.649512	0.518219	0.372313
										NaN	-0.428453	NaN	0.706638	0.979828	0.885878
										NaN	0.402178	NaN	0.736156	0.431313	0.847189
										NaN	-0.350178	NaN	-0.487989	0.942442	0.757916
										NaN	-0.721626	NaN	0.547867	0.678193	0.835834
										NaN	-0.103895	NaN	0.241428	0.622692	0.96895
										NaN	-0.0635442	NaN	0.459008	0.685157	0.251051
										NaN	-0.354188	NaN	-0.125509	0.858815	0.768387
										NaN	-0.253333	NaN	0.501847	0.663106	0.0146945
										NaN	-0.50044	NaN	-0.063939	0.538709	0.612302
										NaN	0.0297175	NaN	0.673305	0.317145	0.847415
										NaN	-0.0919727	NaN	-0.100051	0.773505	0.642875
										NaN	-0.770763	NaN	0.765845	0	0.218059
										NaN	0.382076	NaN	1.05396	0.956801	0.58223
										NaN	0.0425349	NaN	1.15621	0.637918	0.600703
										NaN	0.291071	NaN	0.343617	0.885614	0.873746
										NaN	0.279913	NaN	0.686601	0.405693	0.510372
										NaN	-0.381505	NaN	1.14301	0.828531	0.925915
										NaN	0.690532	NaN	0.340365	0.871051	0.853041
										NaN	-0.0684492	NaN	0.0522019	0.578227	0.437102
										NaN	-0.0809021	NaN	1.12144	0.566636	0.506101
										NaN	0.167736	NaN	1.19068	0	0.567656
										NaN	0.372639	NaN	0.503742	0.922781	0.684971
										NaN	-0.0567748	NaN	-0.315296	0.963045	0.559789
										NaN	0.803681	NaN	0.689276	1.07839	0.717609
										NaN	-0.626095	NaN	0.422295	0.893085	0.704145
										NaN	-0.459645	NaN	0.247859	0.966369	1.09514
										NaN	-0.65181	NaN	0.736437	0.757069	0.449624
										NaN	-0.64345	NaN	1.06483	0.899799	1.0874
										NaN	-0.66598	NaN	1.16562	0.883334	0.507974
										NaN	0.257494	NaN	0.377477	0.786159	0.220571
										NaN	-0.609501	NaN	0.57481	0.705174	0.866028
										NaN	0.433769	NaN	0.183938	0.934228	0.562965
										NaN	0.00455357	NaN	0.272074	0.921352	0.856337
										NaN	-0.290584	NaN	0.736817	0.940618	0.793144
										NaN	-0.249205	NaN	-0.0460733	0.91795	0.91907
										NaN	-0.439471	NaN	0.0173605	0.952832	0.943339
										NaN	-0.0641107	NaN	1.20681	0.862317	0.663354
										NaN	-0.206026	NaN	1.39537	0.930003	0.627243
										NaN	0.0840209	NaN	-0.114114	0.486402	0.480473
										NaN	0.00228346	NaN	0.344192	0	0.613386
										NaN	-0.150169	NaN	0.447296	0.859799	0.490365
										NaN	-0.0282851	NaN	1.03012	0.593457	0.2681
										NaN	0.305858	NaN	0.302051	0.955856	0.0138641
										NaN	0.386103	NaN	-0.133773	0.737884	0.524959
										NaN	0.411689	NaN	0.0756318	0.95454	0.731696
										NaN	0.14305	NaN	0.583183	0.550271	0.114225
										NaN	-0.0234519	NaN	-0.190646	0.934513	0.643437
										NaN	0.771917	NaN	0.496824	0.16196	0.490594
										NaN	0.550105	NaN	0.433274	0.770605	0.175117
										NaN	-0.207024	NaN	-0.205971	0.485117	0.707787
										NaN	0.144419	NaN	0.681944	0.77101	0.673787
										NaN	0.296132	NaN	0.248788	0.564869	0.408341
										NaN	-0.0217451	NaN	0.0603262	0.766769	0.732599
										NaN	0.430352	NaN	0.461588	0.646053	0.399829
										NaN	-0.446042	NaN	0.0984112	0.690967	0.74637
										NaN	-0.456828	NaN	-0.115862	0.796704	0.379347
										NaN	-0.734913	NaN	-0.874754	0.35564	0.802164
										NaN	-0.94872	NaN	0.718132	1.03149	0.724979
										NaN	0.0368698	NaN	0.679034	0.398501	0.615629
										NaN	-0.743302	NaN	-0.620655	0.84489	0.689786
										NaN	0.0861669	NaN	-0.346289	0.457213	0.831816
										NaN	-0.592955	NaN	-0.0761697	0.826484	1.09358
										NaN	-1.08196	NaN	1.09855	0.856812	0.655042
										NaN	-0.499673	NaN	1.28338	1.0027	0.355396
										NaN	-0.217404	NaN	-0.890102	0.910772	0.15514
										NaN	-0.877676	NaN	-0.188135	0.949362	0.376273
										NaN	-0.379898	NaN	0.649246	0.791029	0.590173
										NaN	-0.66918	NaN	-0.153227	0.961252	0.781517
										NaN	-0.490207	NaN	0.65269	0.902552	0.509814
										NaN	-0.337248	NaN	1.04965	0.804138	0.453899
										NaN	-0.823098	NaN	0.0251071	0.917517	0.53914
										NaN	0.350002	NaN	1.14175	0.695647	0.526542
										NaN	0.0489038	NaN	1.15048	0.850631	0.615448
										NaN	0.190049	NaN	0.479469	0.967164	0.320569
										NaN	-0.214509	NaN	-0.406947	0.985287	0.447323
										NaN	-0.581308	NaN	-0.00276578	0.868192	0.300799
										NaN	0.56826	NaN	0.726501	0.986415	0.722979
										NaN	0.274864	1.20975	-0.754491	0.928668	1.12436
										NaN	-0.191599	1.67878	-0.126972	0.698526	0.73841
										NaN	0.0710248	1.2069	-0.681184	0.899634	0.758596
										NaN	0.4133	1.41029	-0.410655	0.868044	0.919725
										NaN	0.178058	1.67967	0.505473	0.950861	0.428792
										NaN	0.67568	1.19766	-0.326775	0.772383	0.868307
										NaN	-0.314522	1.33074	0.206567	0.856388	0.0537664
										NaN	-0.283812	0.982888	0.69044	0.902493	0.80207
										NaN	-0.437801	1.54398	0.64671	0.894857	0.473956
										NaN	-0.108266	1.13717	0.460873	0.847601	0.414128
										NaN	-0.616883	1.34209	0.364415	0.850003	0.675961
										NaN	0.137953	1.33523	-0.748002	0.911063	0.701441
										NaN	-0.137576	1.32407	-0.20415	0.878044	1.15758
										NaN	-0.128142	1.45385	0.13467	1.01029	0.153423
										NaN	-0.170365	1.18216	-0.856971	0.920268	0.223682
										NaN	-0.33528	1.0988	-1.15574	0.928757	0.602133
										NaN	0.0958406	1.51611	1.15806	0.905642	1.5326
										NaN	-0.127205	1.53005	0.347312	1.07623	0.955446
										NaN	0.236654	1.58347	-0.673296	0.86622	0.926569
										NaN	0.108791	1.44869	-0.263022	0.90012	1.11939
										NaN	-0.0939044	1.10655	-0.692355	0.919907	1.16298
										NaN	0.193363	1.34596	-0.276193	1.04039	0.909784
										NaN	0.35998	1.63951	0.296884	1.0387	0.64855
										NaN	0.336195	1.09675	-0.197939	0.839194	0.600272
										NaN	0.433266	1.24335	0.128172	1.0353	0.929978
										NaN	0.22552	0.927977	0.646352	0.971109	0.336227
										NaN	0.377132	1.4142	0.322951	0.850067	0.644878
										NaN	0.389923	1.01659	0.624191	0.960861	0.667554
										NaN	0.315152	1.22959	0.511024	0.991328	0.694614
										NaN	0.166467	1.22292	-0.263979	0.801275	0.235337
										NaN	0.572068	1.27331	0.268276	0.899784	0.37863
										NaN	0.0441972	1.19262	0.393774	0.91091	0.88825
										NaN	0.0461986	1.09366	-0.566545	0.88978	0.427524
										NaN	0.23023	1.08262	-0.8579	0.967048	0.14359
										NaN	-0.332805	1.30511	1.01921	0.926481	0.960583
										NaN	-0.480322	1.34762	0.972678	0.737538	0.811436
										NaN	0.17427	1.26504	-0.86717	0.801527	0.186737
										NaN	-0.379175	1.39146	-0.149606	0.815296	0.37028
										NaN	0.186444	1.75944	0.0160751	0.863582	0.556599
										NaN	-0.230637	2.55953	-0.365779	0.843294	0.672103
										NaN	-0.196823	1.44433	0.14748	0.864599	1.36088
										NaN	-0.0312158	2.23049	-0.114404	0.954896	0.744472
										NaN	-0.272538	1.3835	0.461724	0.881424	0.564826
										NaN	0.0826231	2.02599	-0.181968	0.948891	0.646825
										NaN	-0.28646	1.42065	0.595348	0.844523	1.57513
										NaN	0.114445	1.56642	0.982492	0.943716	0.950898
										NaN	0.0740598	1.76424	-0.0138654	0.858114	0.701929
										NaN	-0.180906	1.86061	0.389207	0.869296	0.823641
										NaN	0.018033	2.18571	0.418335	0.810987	0.635863
										NaN	0.290373	1.46884	-0.592621	0.912454	0.990566
										NaN	0.240809	1.32171	-0.595885	0.96706	0.819806
										NaN	0.306244	1.60642	0.52673	0.776735	0.436768
										NaN	0.131667	1.79668	0.715716	0.923254	0.949091
										NaN	-0.0371488	1.78427	-0.828374	0.906419	0.626051
										NaN	0.813321	1.27876	-0.552663	0.850794	0.608958
										NaN	0.411506	1.43482	0.36135	0.887427	1.01356
										NaN	-0.405451	1.05771	-0.295685	0.985969	1.21085
										NaN	0.0431749	1.19944	-0.0356196	0.802795	0.217514
										NaN	0.412437	0.936107	0.512875	0.892234	0.859274
										NaN	-0.248678	1.22927	0.387243	0.884696	1.05702
										NaN	0.478673	1.11242	0.624124	0.944363	0.696439
										NaN	-0.857485	1.11264	0.713243	0.952311	0.501873
										NaN	0.225074	1.21605	-0.258328	0.893826	0.847427
										NaN	-0.454348	1.21907	0.0286932	0.745182	0.692256
										NaN	0.27096	1.09441	0.506566	0.527625	0.74182
										NaN	-0.251499	1.14889	-0.417927	0.729065	0.44169
										NaN	-0.316737	1.02845	-0.849835	0.794886	0.69736
										NaN	0.0190709	1.25859	1.08874	0.775914	0.900932
										NaN	-0.354268	1.26423	0.495877	1.05029	1.13877
										NaN	0.0958332	1.32783	-0.556086	0.714009	0.655497
										NaN	-0.241752	2.16647	0.011707	1.01348	0.48217
										NaN	-0.225951	1.44782	-0.934011	0.661597	0.902389
										NaN	0.29199	1.36091	-0.515241	1.01421	0.871268
										NaN	-0.0104836	1.08876	-0.0040945	0.714432	0.94886
										NaN	-0.246378	1.48732	0.0092329	0.739762	0.847429
										NaN	0.288205	1.1154	0.21632	0.744497	0.771094
										NaN	0.311121	1.2234	0.343883	0.921004	1.06709
										NaN	0.469717	1.51826	-0.502311	0.973625	1.16358
										NaN	0.359853	1.57961	-0.242573	0.579881	0.648577
										NaN	-0.196741	1.51003	0.198256	0.894526	1.13893
										NaN	0.910608	1.3127	-0.55111	0.918473	1.2563
										NaN	0.555438	1.17194	-0.830156	0.730122	0.862141
										NaN	-0.0283968	1.25628	0.680557	0.890853	1.11979
										NaN	0.162503	1.57987	0.274566	0.638758	1.33812
										NaN	0.331746	1.52951	-1.03307	0.701515	0.782082
										NaN	-0.0816863	1.62618	0.0809323	0.851847	0.827149
										NaN	0.544563	3.33731	-0.500665	0.675322	0.863635
										NaN	-0.176225	1.52226	0.043247	0.925727	0.709815
										NaN	-0.483827	2.89766	-0.59792	0.97884	1.21225
										NaN	-0.092598	1.67868	0.0260674	0.81278	1.01218
										NaN	-0.791771	1.63368	0.594723	0.828422	0.415053
										NaN	-0.599218	1.98111	0.221932	0.892723	0.703979
										NaN	-0.0829878	2.06525	0.0825526	0.878201	0.587151
										NaN	-0.0617033	2.11824	0.150696	0.825971	1.46372
										NaN	-0.264469	1.84773	-0.101327	0.944301	0.163675
										NaN	-0.0410607	1.65908	-0.0106491	0.888125	0.518067
										NaN	-0.302917	2.85422	0.157118	0.934424	0.641108
										NaN	0.000368494	5.06705	0.724326	0.864277	1.13964
										NaN	0.106773	2.15252	-0.715669	1.01064	1.05495
										NaN	-0.417232	1.30845	-0.429635	0.858465	0.900232
										NaN	0.391866	0.946666	-0.045291	0.812523	1.0127
										NaN	-0.128105	1.05279	0.0161446	0.829913	0.926632
										NaN	0.294885	1.00993	0.122278	0.984585	1.00049
										NaN	0.173683	1.11425	0.276743	1.05248	0.95053
										NaN	-0.301194	1.32593	-0.506694	0.791588	0.47267
										NaN	0.66551	1.33098	-0.272437	0.946892	1.23267
										NaN	-0.00769416	1.27428	0.0851069	0.906395	0.527789
										NaN	0.127287	1.07368	-0.431432	0.778205	1.25486
										NaN	0.246219	1.00208	-0.657979	0.91559	0.937609
										NaN	0.702325	1.1744	0.861822	0.802336	1.13167
										NaN	0.1003	1.25906	0.384612	0.796961	0.693739
										NaN	0.922802	1.29446	-0.777382	0.845105	1.38872
										NaN	-0.233748	0.842302	-0.165671	0.898363	1.30519
										NaN	-0.762585	2.06589	-0.285305	0.866421	1.15015
										NaN	-0.353945	1.15798	0.342979	0.867311	1.49296
										NaN	-0.282098	1.31727	0.706283	0.858785	0.946816
										NaN	-0.187278	1.45298	0.109957	0.652597	0.608178
										NaN	0.293664	1.62348	-0.2929	0.689873	0.45318
										NaN	-0.167173	1.36547	0.44721	0.76852	1.24056
										NaN	0.330934	1.43499	-0.19504	0.909918	0.73386
										NaN	0.164051	1.33363	-0.275394	0.721003	0.242737
										NaN	0.0210338	2.05885	0.258144	0.867619	0.584839
										NaN	0.149364	1.98955	0.611108	0.78841	1.53957
										NaN	0.00952347	1.3098	-0.669908	0.916997	1.36755
										NaN	0.172804	1.04482	-0.0983743	0.820833	1.00753
										NaN	-0.224365	0.961257	-0.361469	0.761727	1.19549
										NaN	0.126812	1.04721	0.071513	0.821348	0.797162
										NaN	-0.102963	1.14412	0.270729	0.830002	0.989762
										NaN	0.13153	1.0149	-0.286143	1.05208	1.36199
										NaN	-0.187624	1.07301	-0.00185965	0.811929	0.550387
										NaN	0.0810298	1.01397	0.383413	0.938201	1.22185
										NaN	0.173158	0.955014	0.314762	0.879858	0.893845
										NaN	0.431301	0.98462	0.00451878	0.778925	0.694214
										NaN	0.0245851	1.07623	0.546217	0.884713	0.915286
										NaN	0.301597	1.12891	-0.710855	0.808771	0.947693
										NaN	0.423838	1.32257	-0.218427	0.70994	0.178735
										NaN	-0.40961	1.57956	0.442584	0.763576	1.06238
										NaN	-0.398444	1.66842	0.306408	0.830178	1.16823
										NaN	-0.535084	1.69871	0.257317	0.722451	1.14337
										NaN	-0.598538	1.6473	0.156425	0.837865	1.1283
										NaN	-0.627282	1.65537	-0.0945924	0.806906	0.471415
										NaN	-0.252532	1.48049	-0.0795708	0.853841	-0.141222
										NaN	-0.26014	1.72908	0.109066	0.843383	0.508713
										NaN	-0.0840951	1.6242	0.539703	0.964824	0.911144
										NaN	-0.147606	1.38889	-0.712933	0.825407	0.265559
										NaN	-0.422302	1.14935	-0.411345	0.889707	0.0263115
										NaN	-0.26372	1.2219	0.0642424	0.812004	0.512978
										NaN	-0.0378892	1.14584	0.0130217	0.996804	0.640771
										NaN	0.210062	1.19026	-0.296056	0.871092	0.466814
										NaN	0.121923	1.04217	0.163442	0.862464	0.60192
										NaN	-0.0881964	0.933879	0.250707	0.868147	0.309786
										NaN	0.0965229	1.05861	0.232609	0.965958	1.16524
										NaN	0.195836	1.12493	0.467105	0.966968	1.33111
										NaN	0.285998	1.35576	-0.855681	0.788907	0.18217
										NaN	-0.0129309	1.32839	0.145323	0.975412	1.38809
										NaN	0.38842	1.27405	-0.151733	0.884861	0.858626
										NaN	0.169668	1.35634	-0.0998072	0.80991	0.678524
										NaN	0.0383026	1.35598	0.279615	0.885386	0.586181
										NaN	0.521033	1.08479	0.328426	0.824322	0.72992
										NaN	-0.831438	1.2012	0.622938	0.784821	0.595131
										NaN	-0.579026	1.17777	0.673979	0.873596	1.09609
										NaN	-0.522329	1.30964	-0.307165	0.84007	0.912875
										NaN	0.0700604	1.58004	-0.149803	0.847982	0.658224
										NaN	-0.736671	1.56441	0.073249	0.886347	0.964589
										NaN	0.0187666	1.42205	-0.73433	0.87502	0.289648
										NaN	-0.120794	1.19342	-0.88332	0.842369	0.682616
										NaN	-0.628717	1.55746	0.596667	1.03548	0.688766
										NaN	-0.376763	1.50808	0.0799845	0.86855	0.440211
										NaN	0.0250048	1.49254	-0.752988	0.939036	0.197571
										NaN	-0.25219	1.42167	0.0576216	0.880232	0.458379
										NaN	-0.288648	1.54189	-0.0542571	1.07272	0.748926
										NaN	-0.132859	1.19564	0.0879243	0.858759	0.598714
										NaN	-0.421884	1.67877	0.669369	0.927772	0.632337
										NaN	0.0765536	1.80959	0.473156	0.955202	0.347044
										NaN	-0.439181	1.43487	-0.183735	0.976602	1.08305
										NaN	0.0488917	1.32792	0.306904	1.05227	1.40217
										NaN	-0.535457	1.17478	0.343996	0.837337	0.187757
										NaN	0.0681801	1.52982	0.477358	0.952143	1.39817
										NaN	-0.0985455	1.46557	0.457216	0.970322	0.912667
										NaN	0.118954	1.48823	-0.458706	0.885596	0.580549
										NaN	0.147871	1.16723	-0.905729	0.975315	0.705024
										NaN	-0.686659	1.4632	0.510086	0.913676	0.617229
										NaN	-0.405549	1.73117	0.0955282	0.751588	0.523323
										NaN	-0.0193043	1.22871	-0.547134	0.931465	0.935798
										NaN	-0.665417	1.32118	0.767751	0.911843	0.91389
										NaN	-0.185551	1.29619	0.386077	0.857666	0.720328
										NaN	-0.445857	1.14408	-0.366181	0.960592	0.801408
										NaN	-0.402116	1.43619	-0.292284	0.934959	0.433159
										NaN	-0.349107	1.78714	0.679811	0.87239	1.54145
										NaN	-0.373298	1.61443	0.844175	0.874148	0.469293
										NaN	0.0586908	1.01433	0.0168433	0.897501	0.646908
										NaN	-0.538377	0.827461	0.339894	0.849746	0.349117
										NaN	-0.220762	1.45271	-0.121745	0.945739	0.0688688
										NaN	-0.413247	0.90973	0.0709905	0.871807	1.0401
										NaN	-0.158051	1.01574	0.160887	0.883055	0.653894
										NaN	-0.139799	1.09115	-0.277978	0.835756	0.600637
										NaN	-0.304187	1.0467	0.408581	0.914016	1.36866
										NaN	-0.378669	1.09645	0.567381	1.0411	1.44058
										NaN	0.077737	1.03021	0.34062	0.752638	0.9401
										NaN	0.0297613	1.09463	0.810343	0.932664	1.11718
										NaN	-0.0400912	1.01916	0.661263	0.881996	0.929036
										NaN	0.48227	1.05701	0.775432	0.847547	0.768568
										NaN	-0.742743	1.12367	0.680146	0.91453	0.49895
										NaN	-0.52354	1.07491	0.15973	0.869258	0.687152
										NaN	-0.806007	1.00193	0.697842	0.781686	1.07449
										NaN	-0.434538	0.978991	0.74463	0.881787	0.925872
										NaN	-0.412518	1.1423	0.766496	0.840677	0.172922
										NaN	-0.481922	1.08993	0.534728	0.862229	0.698834
										NaN	-0.53562	1.10614	0.84706	0.906091	1.19242
										NaN	-0.442333	1.01692	0.805534	0.844025	0.964273
										NaN	-0.121619	1.06346	0.676266	1.01396	0.418855
										NaN	0.225555	1.03551	0.947306	1.08659	0.66599
										NaN	-0.364355	0.988803	0.979231	1.00396	1.23028
										NaN	-0.452475	1.22491	0.3135	1.44938	1.10398
										NaN	-0.191173	1.03856	0.711733	0.999449	1.05383
										NaN	0.12646	1.04907	0.843203	0.955771	1.09604
										NaN	0.0403321	1.02327	0.940808	1.13083	1.18256
										NaN	-0.130814	1.00865	0.808435	1.13908	0.701395
										NaN	0.10788	1.25988	0.588866	1.21508	0.730029
										NaN	-0.0991559	1.08208	0.693223	0.892422	0.761209
										NaN	0.235993	0.988073	0.418076	1.15802	0.890588
										NaN	0.199792	1.01899	0.348275	1.04507	0.514061
										NaN	-0.710474	1.09335	0.489876	0.963222	1.14285
										NaN	-0.596149	1.08251	0.769675	0.979381	0.590781
										NaN	-0.197603	1.23303	0.459509	1.10189	0.677843
										NaN	-0.00789691	1.09746	0.140415	0.88399	0.872036
										NaN	-0.409283	1.11912	0.00702722	1.03592	0.812684
										NaN	-0.476231	1.01898	0.143787	1.04866	1.132
										NaN	-0.125625	1.10262	0.184391	1.05349	1.00372
										NaN	0.0851622	1.26678	0.476085	1.11424	1.0024
										NaN	0.158401	0.96619	-0.000707169	1.03048	1.36129
										NaN	-0.175156	0.967006	0.322266	0.96005	0.103974
										NaN	-0.315142	1.26556	0.876245	0.835638	0.830795
										NaN	0.120672	1.27281	0.316487	1.05959	0.584001
										NaN	0.10294	1.07068	0.293325	0.941097	0.825184
										NaN	0.0630331	1.14523	0.277171	0.918992	0.729589
										NaN	0.0654788	1.10522	0.105472	0.918941	0.616977
										NaN	0.320605	1.04838	0.89515	1.01707	0.841971
										NaN	0.296151	1.11496	0.12312	1.13522	1.32949
										NaN	0.458932	1.08585	-0.222921	0.847732	0.475696
										NaN	0.558898	1.20776	-0.139697	0.9713	1.19703
										NaN	-0.260682	1.06778	0.788081	0.934584	0.554562
										NaN	-0.504156	1.26737	0.208919	0.854754	0.775451
										NaN	-0.340483	1.15821	0.444827	0.94146	0.793799
										NaN	-0.129793	1.11183	0.849151	0.954781	0.795056
										NaN	-0.64357	1.03246	0.21272	0.792806	0.427868
										NaN	-0.3203	1.24994	0.302238	0.97588	0.528419
										NaN	-0.0571721	1.13169	0.523023	0.945662	0.710696
										NaN	0.00312385	1.12775	0.270034	0.955114	0.845407
										NaN	0.0393716	1.12959	0.688641	0.992499	0.79691
										NaN	0.0399963	1.12787	0.941777	0.914956	0.684609
										NaN	-0.028802	0.964028	0.594647	0.936212	0.77759
										NaN	0.437932	0.813839	-0.000291962	1.12285	0.674673
										NaN	-0.0461278	0.852523	0.478236	0.972698	0.558085
										NaN	-0.163816	0.907987	1.41162	0.998606	0.731158
										NaN	0.138699	0.904578	0.669908	0.970355	0.371331
										NaN	0.0352839	0.911384	0.475476	1.05597	0.848488
										NaN	0.277333	0.919835	0.521353	1.04659	1.4136
										NaN	0.309158	1.00139	1.07709	0.834647	0.28319
										NaN	-0.190009	0.916312	0.650117	1.06996	1.38116
										NaN	-0.306319	0.984985	0.399103	1.01042	0.797085
										NaN	-0.689838	0.933166	1.43657	0.910033	0.618303
										NaN	-0.457974	0.851929	1.0507	0.972957	0.9462
										NaN	-0.246789	0.833164	0.724745	0.991948	0.911145
										NaN	-0.000631171	0.956294	0.752444	0.846495	0.450983
										NaN	0.00436233	0.953533	1.17864	0.993407	0.784332
										NaN	-0.382092	0.987557	0.987244	0.926254	0.810591
										NaN	-0.617542	0.86862	1.27336	0.987514	0.686392
										NaN	-0.102839	0.892688	1.28187	0.994095	1.19283
										NaN	-0.0722931	0.871848	1.01207	0.988226	0.0276248
										NaN	-0.0454293	0.831884	0.798117	0.994682	0.353805
										NaN	-0.125562	0.97884	1.1582	0.824852	0.779019
										NaN	0.120256	0.889716	1.18858	0.867322	0.542418
										NaN	0.163802	0.8801	1.29884	0.895758	0.746365
										NaN	0.301521	0.818434	1.0353	0.98609	0.700764
										NaN	0.205735	0.837161	0.687464	0.993039	0.861039
										NaN	-0.553853	1.13602	1.38966	0.8139	0.570211
										NaN	-0.265949	0.853135	1.16346	1.02	0.925979
										NaN	-0.577949	0.783997	0.973276	0.918191	0.94922
										NaN	-0.52806	0.817334	0.784739	0.855408	1.11241
										NaN	-0.320176	0.935892	0.403758	0.936507	0.723355
										NaN	-0.410432	0.908342	1.08128	0.884027	0.798088
										NaN	0.0257544	1.03618	1.36155	0.816358	1.54255
										NaN	-0.124368	0.954842	1.20974	0.907666	0.485503
										NaN	-0.332489	0.852945	0.817267	0.912668	0.576899
										NaN	-0.0539688	0.782443	0.964079	0.943213	0.985825
										NaN	-0.171133	0.868315	0.855813	0.942641	0.610974
										NaN	-0.399491	1.12294	0.504225	0.865573	1.04061
										NaN	-0.148239	0.853769	0.739617	1.30789	0.907363
										NaN	-0.25054	0.920054	0.909754	1.00733	0.483152
										NaN	0.187469	0.955657	1.20326	1.28534	0.142381
										NaN	-0.155017	1.11045	1.36845	1.20884	0.855938
										NaN	-0.183609	0.885343	0.847101	1.2214	1.03539
										NaN	-0.253042	0.991676	1.15894	0.963396	0.623921
										NaN	-0.824102	0.885282	0.964425	1.23506	1.15412
										NaN	-0.22628	0.809648	1.66454	1.10911	0.619328
										NaN	-0.534254	0.816658	1.13216	0.954535	1.02612
										NaN	-0.344811	0.988833	1.20529	1.06401	0.902772
										NaN	-0.290189	0.992201	0.972261	1.32355	0.751402
										NaN	-0.722222	0.888556	1.22516	0.844439	1.14173
										NaN	-0.115294	0.997947	1.50336	1.12428	0.503142
										NaN	-0.369424	0.936083	1.35109	1.06099	0.505664
										NaN	-0.0400284	0.797433	1.29702	1.12859	0.824815
										NaN	-0.206075	0.801279	1.16837	1.2172	0.996755
										NaN	-0.45341	0.93291	0.968252	1.09235	0.799718
										NaN	0.312909	0.855827	0.978092	0.93356	0.352815
										NaN	-0.133453	0.811514	1.14117	0.823869	0.399903
										NaN	-0.640734	1.02769	1.04643	1.04846	1.11144
										NaN	-0.340443	0.831142	1.59278	1.00815	1.15715
										NaN	-0.177313	0.83027	0.735088	0.84556	0.427441
										NaN	-0.258853	0.967898	-0.239359	1.06316	1.12498
										NaN	-0.532619	0.907645	0.795146	0.92602	0.717575
										NaN	-0.942507	1.02873	0.480539	0.854577	0.856841
										NaN	-0.330993	0.927388	-0.0742904	0.946614	0.994865
										NaN	-0.29018	1.06011	0.294966	0.982498	0.686243
										NaN	-0.219687	0.997281	0.957775	0.735211	0.560282
										NaN	-0.479684	0.969344	0.54946	0.97156	0.776614
										NaN	-0.0780741	1.07501	0.246519	0.87233	0.89422
										NaN	-0.0745581	1.10522	0.760001	0.913118	0.759101
										NaN	0.151158	0.8888	0.724268	0.977474	0.736851
										NaN	-0.139827	0.952275	0.65027	0.879328	0.398159
										NaN	-0.423935	1.02949	0.467255	0.927962	0.437985
										NaN	-0.196248	0.973426	0.398705	0.967925	0.613453
										NaN	-0.516987	1.05133	0.358189	1.02125	0.587208
										NaN	-0.31827	0.888857	1.08611	0.741759	0.0556181
										NaN	-0.557008	1.01024	1.14473	1.00126	1.17383
										NaN	-0.332379	0.967375	0.554123	0.909944	0.430814
										NaN	0.068865	0.965399	0.733909	0.818974	0.733068
										NaN	-0.408171	1.22831	0.523441	0.955288	0.972182
										NaN	-0.661836	0.984326	0.73021	1.00592	0.811125
										NaN	-0.109705	0.932308	0.818745	0.798504	0.898328
										NaN	-0.105206	0.782116	0.73756	0.785423	1.10441
										NaN	-0.0920982	0.866741	0.81273	0.893183	0.656594
										NaN	-0.0546965	1.14378	1.17221	0.907392	0.848634
										NaN	-0.0594145	0.947865	1.26996	0.910676	1.01696
										NaN	-0.484403	0.938917	0.97701	0.872993	0.630331
										NaN	-0.228206	0.948269	0.553938	1.05262	1.35102
										NaN	-0.391109	1.01401	0.500259	1.03504	1.2398
										NaN	-0.751122	1.01371	0.823209	0.716703	0.578876
										NaN	0.0674018	1.19417	0.726947	1.2579	1.43297
										NaN	-0.317582	1.06893	0.901928	1.03592	0.586325
										NaN	-0.202829	1.10297	0.847813	0.868243	0.825023
										NaN	-0.232321	0.872634	0.894171	0.978268	0.952593
										NaN	-0.341378	0.992384	0.581213	0.913487	1.01351
										NaN	0.0563538	1.28301	0.358912	0.814553	0.578545
										NaN	0.0326352	0.846545	0.769569	0.938008	1.02438
										NaN	0.0877223	0.918902	0.605855	0.834397	0.900488
										NaN	-0.116495	0.987301	0.761945	0.905917	0.949182
										NaN	-0.061913	1.14747	0.997501	0.990373	0.888426
										NaN	0.0415141	0.927991	0.998836	0.956499	0.420746
										NaN	-0.673454	1.02101	0.258333	1.14961	0.374883
										NaN	-0.124846	1.01718	0.977244	0.889575	0.921829
										NaN	-0.167635	0.860429	1.22212	1.19291	0.505342
										NaN	0.24098	1.08008	0.347704	1.0456	1.03489
										NaN	-0.517331	0.971945	0.288635	0.91432	1.34731
										NaN	0.0164729	1.03935	1.14111	1.06906	0.954402
										NaN	-0.214593	1.01722	1.15789	0.954572	1.03585
										NaN	-0.107819	1.06848	0.881498	0.859986	0.953764
										NaN	-0.192907	1.02976	0.555504	0.967535	0.668864
										NaN	-0.0118329	0.988963	1.02586	0.987734	0.643653
										NaN	-0.162003	0.923915	1.03976	1.03805	0.926262
										NaN	-0.417496	1.12046	0.787017	1.08594	0.857055
										NaN	-0.54708	1.01727	0.62227	1.06446	0.85514
										NaN	0.167916	0.925653	1.00323	1.01493	0.895711
										NaN	-0.127288	0.993478	0.898367	1.12577	-0.122524
										NaN	-0.0519004	0.969661	1.21917	1.05697	0.70632
										NaN	0.214268	0.921085	0.913256	1.07485	1.23405
										NaN	-0.717846	1.01857	0.730463	1.04797	0.914255
										NaN	-0.245839	1.05905	0.280801	1.05608	0.839947
										NaN	0.0656321	1.04058	-0.175556	0.904825	1.34505
										NaN	-0.727943	1.11386	0.658961	1.06865	0.761057
										NaN	-0.63164	1.05213	0.601884	1.06772	0.699054
										NaN	-0.305453	1.03101	0.29624	1.07528	1.14952
										NaN	-0.191521	1.16796	0.426531	1.06026	0.484955
										NaN	-0.0131465	1.10636	0.266429	1.06595	0.982315
										NaN	0.137689	0.978854	0.450569	0.942796	1.00613
										NaN	-0.351981	1.03277	0.397617	0.825501	0.437999
										NaN	-0.0528792	1.11216	0.682126	0.799169	0.938701
										NaN	-0.352908	1.0675	0.461809	0.838141	0.792016
										NaN	-0.547776	1.17919	0.343948	0.75674	0.760616
										NaN	-0.0940872	1.08411	0.855977	0.666787	0.697297
										NaN	-0.0416005	1.08414	0.529859	0.680092	1.18255
										NaN	0.166859	1.04479	0.524089	0.814617	0.806503
										NaN	0.0659909	1.0437	0.721394	0.771527	0.729036
										NaN	0.32953	1.2595	0.491336	0.795987	0.90901
										NaN	-0.155375	1.02797	0.749115	0.72365	0.410752
										NaN	-0.428622	1.05449	0.264586	1.04487	0.854667
										NaN	-0.638184	1.02522	0.760149	1.03502	1.05218
										NaN	-0.154543	0.959297	0.975111	1.04651	0.798423
										NaN	0.164863	1.27646	0.807942	1.08266	0.880829
										NaN	-0.345686	1.14594	0.815285	0.897994	1.22801
										NaN	-0.00743741	1.00982	0.29862	1.04385	0.815055
										NaN	0.068112	1.07502	0.569775	1.01439	0.438534
										NaN	0.377814	1.09707	0.763115	1.06945	1.02281
										NaN	-0.46341	1.09251	0.647596	1.10088	0.475384
										NaN	0.233647	1.32582	0.57267	1.04575	0.817687
										NaN	-0.1693	1.12786	0.537952	0.894327	1.01549
										NaN	-0.745462	1.29295	0.278433	0.958822	0.0910054
										NaN	-0.24078	1.03627	0.252497	1.02812	0.870988
										NaN	-0.353938	1.07713	0.575163	0.857453	0.801984
										NaN	-0.314248	1.2434	0.742466	0.921785	1.1674
										NaN	0.0622251	0.966424	0.226746	0.93762	1.03201
										NaN	-0.616459	0.978637	0.487241	0.963031	0.825459
										NaN	-0.152776	1.13803	0.841271	1.06148	0.951573
										NaN	-0.255574	1.39532	0.413931	0.986128	0.841094
										NaN	-0.209917	1.11808	0.0924909	0.932856	0.372219
										NaN	0.0135181	1.12471	0.258622	0.947288	0.552914
										NaN	0.0815802	1.1209	0.609161	0.790748	0.452664
										NaN	-0.45075	1.06951	0.719792	0.860234	1.02834
										NaN	-0.218419	1.17986	0.110521	0.887375	1.03315
										NaN	-0.556441	1.06382	0.030836	0.853342	0.891042
										NaN	0.120605	1.29135	0.329868	0.907286	0.825859
										0.97657	-0.726645	1.10826	0.846601	0.845909	0.504244
										1.18495	-0.70965	1.17426	0.779429	1.04411	0.399738
										1.22203	-0.78967	1.15815	0.439785	0.874213	0.868843
										1.30239	-0.645904	1.17327	0.754026	0.980654	1.02237
										1.0743	-0.669722	1.0446	0.294192	0.945918	0.933003
										1.1996	-0.980189	1.20872	-0.150122	0.948524	0.860132
										1.03188	-1.2036	1.12373	0.260924	1.03132	0.816914
										1.27624	-0.894467	1.11384	0.555061	0.966652	0.858573
										1.34205	-0.746426	1.10742	0.850459	0.816571	0.423561
										0.890708	-0.78499	1.06604	1.06958	1.01558	0.596854
										1.27907	-0.851366	1.02464	0.84838	0.987329	0.730411
										0.891547	-0.591905	0.997654	0.888616	1.02391	0.528835
										1.08583	-0.793086	0.966335	0.83979	1.1201	0.721084
										1.19809	-0.567873	1.13762	1.00428	1.07822	0.496388
										1.03549	-0.924158	0.99177	0.717637	0.82555	0.639652
										0.945088	-0.462927	1.08143	1.17648	0.833134	0.669594
										1.13211	-0.894409	1.11138	1.06796	0.821071	0.385043
										1.00974	-0.706343	1.07174	-0.459397	0.84442	0.627194
										1.14471	-0.717493	0.860825	0.0655581	0.808151	0.559635
										1.20394	-0.836013	0.997599	0.79957	0.951754	0.461314
										1.40788	-0.952156	1.07868	0.967601	0.877992	0.247973
										1.09177	-0.761485	1.05155	-0.346167	1.01447	0.317872
										1.11553	-0.61411	1.12095	0.726656	0.946153	0.779819
										1.24313	-0.948654	0.982362	0.457835	0.971135	0.590019
										1.10952	-0.474322	1.06258	0.892873	0.947433	0.616106
										1.1045	0.153074	1.01028	0.848198	0.902366	0.618932
										1.0104	-0.33506	1.03906	1.27799	1.00859	0.602142
										1.19142	-0.00526721	1.12772	-0.356051	0.998547	0.42823
										1.18724	-0.12166	0.994679	-0.306286	0.968066	0.528231
										0.981653	-0.309398	0.991256	0.840024
										1.08152	-0.0666232	0.925543	1.20165
										1.09447	-0.103821	0.973859	0.877479
										0.996533	-0.241958	1.24026	-0.371371
										1.08678	-0.270835	1.01227	0.612586
										1.16762	-0.186552	0.881435	0.886705
										1.15002	-0.562075	0.917571	0.335003
										1.0496	-0.511737	1.03569	0.194007
										1.15181	-0.444771	0.999533	0.365585
										0.969199	-0.712909	1.27495	0.108549
										1.10832	-0.430674	1.05259	0.29668
										1.02578	-0.203325	1.04931	0.274638
										1.08769	-0.215112	1.00085	0.562838
										1.06614	0.197893	1.03808	-0.147819
										0.968141	-0.444624	1.14805	0.800798
										1.08799	-0.0890698	0.934129	0.107342
										1.06705	-0.303569	0.977593	-0.0276242
										0.992306	-0.138982	1.11136	0.103224
										1.06428	-0.284119	1.17384	-0.217903
										1.11055	0.0544444	1.03234	0.65523
										1.05622	-0.110499	1.1239	-0.779798
										1.04496	-0.0381699	1.08418	-0.00412276
										1.0699	-0.516102	1.00624	-0.555449
										0.926888	-0.182991	1.00921	-0.000772228
										1.09566	-0.241054	1.16548	-0.459098
										1.07903	-0.352278	1.10184	0.447016
										1.18377	0.282146	1.02644	0.263581
										0.963231	-0.268105	1.17977	-0.836344
										1.08855	0.0983799	1.07902	-0.387875
										1.07351	-0.307896	1.0636	0.790143
										0.979141	0.133562	0.944492	0.340993
										1.04999	-0.124603	1.20972	0.739273
										1.06642	0.279953	1.06326	0.770255
										1.06622	0.227646	1.06059	0.722986
										1.0275	0.381105	1.08985	0.0311246
										1.05834	-0.122926	1.0235	-0.940795
										0.99303	0.269289	0.955153	0.13526
										1.06186	-0.148161	1.0896	0.0183567
										1.07071	-0.290208	1.09795	0.626216
										0.999888	-0.132354	1.07418	-0.359024
										1.05431	-0.465015	1.07367	-0.431401
										0.982735	-0.398704	1.16716	0.417852
										1.01159	-0.41882	1.16128	0.776387
										1.00189	-0.241919	1.03897	0.422716
										1.12356	-0.180723	0.998259	0.0954
										0.993351	-0.24993	1.08218	0.48288
										0.994679	-0.55255	1.06409	0.419193
										1.08128	-0.415249	1.25294	0.118208
										0.823913	-0.791068	1.06054	0.220889
										1.13723	0.137477	1.16518	0.253255
										1.01016	-0.564974	1.05205	0.40576
										1.13088	-0.0767199	1.0933	0.551487
										1.07015	-0.226899	1.32016	0.313304
										0.988391	0.125058	1.08079	0.44756
										1.08783	-0.360884	1.07373	0.145679
										1.13402	-0.286322	1.08927	0.529334
										1.10914	0.0258847	0.941163	0.615159
										1.05391	0.0175961	1.36591	0.269548
										1.07803	-0.252545	1.17371	0.135468
										0.876074	-0.112593	1.01123	0.45171
										0.958338	-0.127726	1.06996	0.52135
										1.02966	-0.358178	1.07088	0.801474
										0.997045	-0.4187	1.14455	0.243815
										0.995908	-0.445202	1.37213	0.721596
										1.00259	-0.259931	1.14708	0.771931
										1.20514	-0.173857	1.21978	0.664087
										1.06243	-0.120529	1.20369	0.510103
										0.999261	-0.218703	1.0476	0.698318
										1.11436	0.240087	1.197	0.859376
										0.891823	-0.367601	1.04325	0.430446
										0.961235	-0.500122	1.0096	0.840623
										0.954971	-0.259507	1.17199	0.272628
										0.954149	-0.291801	1.25214	0.456367
										0.927492	-0.663229	1.13293	-0.27879
										0.976313	-0.169882	1.087	0.535962
										1.00526	0.0205264	1.22638	0.110876
										0.983618	-0.0642675	1.11478	0.340606
										1.02632	-0.167232	1.19661	0.869613
										0.903462	0.0738316	1.04924	1.04744
										1.02574	-0.579335	1.19119	0.137291
										1.05387	-0.757433	1.11574	0.428059
										1.07912	-0.615303	1.55716	0.818695
										1.13941	-0.160645	1.09792	0.77027
										1.05252	0.0603412	1.29053	0.493612
										1.0176	-0.511986	1.09934	0.0083794
										1.11504	-0.0979115	1.2477	-0.493674
										0.932983	-0.0151002	1.17487	0.152897
										0.921932	-0.63071	1.08725	0.562395
										1.04364	-0.272109	1.20101	0.695398
										1.03614	-0.0920589	1.11112	0.508332
										1.02556	0.156539	1.0288	0.935469
										0.964285	-0.296573	1.04696	0.247223
										1.01342	-0.0994904	1.07958	0.357027
										0.820848	0.0586114	0.983538	-0.0391978
										0.980933	-0.57516	1.14821	0.0517321
										1.11231	0.0278342	1.11824	0.69714
										1.00367	0.0729452	0.932483	0.406361
										0.938484	-0.49323	0.964859	0.35061
										0.989798	-0.0781627	1.08464	0.473513
										0.742696	-0.0564567	0.968236	0.634034
										1.07018	-0.299886	1.12378	0.00118203
										1.06677	-0.249715	0.999066	0.520837
										1.02073	-0.394676	1.06139	0.518954
										1.08846	-0.147253	0.969331	0.373452
										0.864481	-0.115171	0.949628	0.576026
										1.15353	-0.512619	1.26996	0.515338
										1.11758	-0.300206	1.02189	0.535454
										1.15564	-0.0189004	1.05045	0.312431
										1.02541	-0.192596	0.944348	0.37485
										0.97244	-0.369389	1.02808	0.914162
										1.05922	-0.28338	1.22418	0.530939
										0.860753	-0.301736	1.04086	0.658767
										1.03515	-0.0308188	0.970978	0.191988
										0.809637	-0.312993	0.959556	0.317325
										0.880457	-0.0718192	1.03814	0.752375
										1.79953	0.0364003	1.04549	0.632763
										0.936188	-0.504302	1.21841	0.468087
										1.81397	-0.291204	1.09061	0.632299
										1.16588	-0.675834	0.969884	0.360895
										1.50022	-0.713832	0.959419	0.274141
										1.18944	-0.380558	1.06727	0.719111
										1.26838	-0.503477	1.2311	0.431208
										1.13936	-0.585733	0.970761	0.207446
										1.05187	-0.536817	0.953602	0.479271
										1.05074	-0.445022	1.08412	0.468077
										1.21134	-0.13263	1.38971	0.374805
										1.16391	-0.469381	1.26204	0.339907
										1.24777	-0.579745	1.2473	0.127723
										1.32844	-0.635323	1.13826	0.717435
										1.29899	-0.523552	0.952175	0.689921
										1.28579	-0.631357	1.27993	0.206798
										1.24558	-0.760953	1.02668	0.272958
										1.19442	-0.725367	1.07912	0.760957
										1.52396	-0.624156	1.11363	0.821924
										1.35823	-0.65725	1.49363	1.04589
										1.73901	-0.0153856	1.13798	0.578762
										1.66862	-0.631571	0.976273	0.840489
										1.57343	-0.530813	0.963538	0.784183
										1.22912	-0.609248	1.16067	0.109727
										1.5468	-0.531664	1.01889	0.289022
										1.26927	-0.191215	1.01968	0.988858
										1.47461	-0.411088	1.12175	0.846423
										2.28715	-0.607044	1.37188	0.698617
										1.52168	-0.306007	0.959483	0.542709
										1.30859	-0.540988	1.08772	0.2798
										1.48708	-0.665255	1.19588	0.413854
										1.6195	-0.0877277	1.26126	-0.0389232
										2.23577	-0.227537	1.19602	1.12961
										1.28161	-0.0250028	1.05442	-0.0512625
										1.44005	-0.0217487	1.10271	0.425776
										1.21545	-0.475807	1.13029	0.240682
										1.17664	-0.19399	1.1356	0.795393
										1.17094	-0.849186	1.155	0.30967
										1.15855	-0.871014	1.11769	0.47144
										1.12029	-0.744988	1.12367	0.374863
										1.33225	-0.664515	1.13063	0.557328
										0.932429	-0.467602	1.14869	0.787513
										1.06292	-0.391935	1.33859	0.840522
										1.25629	-0.500449	1.13444	0.648493
										1.0536	-0.190293	1.11009	0.639173
										1.15357	-0.428176	1.10999	0.830673
										1.33366	-0.511888	1.06411	0.343534
										1.3666	0.0373619	1.28046	0.553819
										1.38077	-0.0239448	1.09149	0.715287
										1.06543	-0.447922	1.07406	0.988106
										1.28143	-0.0694831	1.19704	0.599523
										1.17911	-0.465731	1.10649	0.712667
										1.89572	-1.02122	1.10665	0.509188
										1.57729	-0.752719	1.3746	0.404906
										1.27361	-1.00818	1.14442	0.933541
										1.51612	-0.882943	1.17234	0.772518
										1.15941	-0.372702	1.00589	0.83997
										1.03451	-0.711324	1.09062	1.04198
										5.77335	-0.650472	1.40015	0.523194
										1.14902	-0.609476	0.966934	0.447998
										1.31794	-0.705998	1.00791	0.74825
										1.71218	-0.78185	1.19451	0.655423
										1.34537	-0.365769	1.33515	0.910977
										1.38493	-0.496597	1.23132	0.934579
										1.27842	0.0527999	1.24749	0.907995
										1.33789	-0.564104	1.15873	1.30669
										1.34358	-0.833243	1.20307	0.525322
										1.34775	-0.378462	1.31269	0.92383
										1.00062	-0.513381	1.06898	0.439058
										1.16682	-0.64797	1.35121	1.06109
										1.00242	-0.617161	1.24135	1.01178
										1.17681	-0.813592	1.41032	1.42095
										1.31115	-0.273283	1.29397	0.832438
										1.35155	-0.627183	1.21576	1.15179
										1.58273	-0.617285	1.061	1.45097
										1.59925	-0.308105	1.33005	0.610455
										1.41886	-0.962543	1.20909	0.529539
										1.50909	-0.872951	1.13171	0.914419
										1.22907	-0.423915	1.28423	0.931368
										1.24981	-1.0586	1.4755	0.872566
										1.29292	-0.791245	1.07097	0.866043
										1.2121	-0.800774	1.01112	0.0261458
										1.31257	-0.829956	1.22845	0.400949
										1.1206	-0.590975	1.11428	0.87494
										1.47985	-0.697456	0.99449	0.058047
										1.65472	-0.603688	1.00189	-0.0513099
										1.49921	-0.721479	1.14112	0.334004
										1.47325	-0.769998	1.03096	0.521819
										1.57167	-0.824894	1.15404	0.142569
										1.57882	-0.341722	1.05725	0.245172
										1.71188	-0.401554	1.05825	0.0475592
										1.16521	-0.488654	1.00083	0.507469
										1.39492	-0.679942	1.08699	0.511272
										1.08476	-0.693646	1.3797	0.326015
										1.0633	-0.572262	1.06569	0.462304
										1.03086	-0.318086	1.03094	0.156347
										1.35834	-0.479351	1.02755	0.664874
										1.42371	-0.436274	1.0014	0.672173
										1.3835	-0.298278	1.3125	0.24957
										1.29869	-0.422897	1.0664	0.300223
										1.62324	-0.500665	0.926364	0.492445
										1.2327	0.0102245	1.04227	0.72091
										1.50999	-0.0583688	1.03095	1.06973
										1.1403	-0.215249	1.05056	0.467259
										1.39422	-0.333435	1.34149	0.688467
										1.12609	-0.847729	1.08892	0.714732
										0.999586	-0.528236	1.09908	0.612924
										1.0146	-0.695122	1.05559	0.462556
										1.22976	-0.483449	1.03675	0.902929
										1.07045	-0.452324	1.35519	0.858698
										1.17436	-0.558695	0.902358	0.222991
										1.25173	-0.530629	0.938073	0.802663
										1.22744	-0.0765102	1.12333	0.588312
										1.64474	-0.129816	1.22181	0.675455
										1.08917	-0.405524	1.15131	0.0515508
										1.14203	-0.40735	1.24421	0.720428
										1.03138	-0.691999	1.14679	0.32787
										1.17515	-0.771474	1.06149	-0.159068
										1.34921	-0.482892	1.27233	0.651036
										1.29108	-0.414087	1.00124	0.761567
										1.39817	-0.599882	1.15341	0.429944
										1.42424	-0.488933	1.10865	0.788391
										1.43236	-0.194188	1.70584	0.997087
										1.73109	-0.200484	1.39144	0.757935
										1.22527	-0.477947	1.42118	0.492513
										1.22091	-0.42189	1.07315	0.290858
										0.973706	-0.45544	1.37173	0.0470255
										1.05273	-0.0204662	1.67703	0.320381
										1.09119	-0.0439196	1.10438	0.844359
										1.04348	-0.175849	1.12275	0.762833
										1.12367	-0.152322	1.0009	0.100131
										1.13127	-0.101883	1.01913	1.1882
										1.28687	-0.0204617	1.11915	0.137745
										1.06862	-0.382677	1.15485	0.847861
										1.06386	-0.0454602	0.973854	0.623919
										1.05626	-0.383829	1.06877	-0.200296
										1.09102	-0.37953	1.13236	0.301798
										1.05762	-0.474647	1.1054	0.633997
										1.32884	-0.403082	1.12033	-0.33562
										1.13618	-0.31907	1.01499	0.282511
										1.3613	-0.261723	1.18645	0.192938
										0.977869	-0.223222	1.07724	0.336475
										1.17961	-0.400692	0.977416	0.33582
										1.32674	-0.751603	1.41042	0.57643
										2.36759	-0.744395	0.9778	0.430564
										1.78993	-0.548118	1.0974	0.110216
										1.82422	-0.23468	0.994783	0.635098
										1.88193	-0.0730827	0.914245	1.129
										1.32724	-0.517622	1.40571	0.412657
										1.2306	-0.0902767	1.01142	0.435905
										1.51044	-0.746339	0.952886	0.457236
										1.85458	-0.784212	1.01367	0.780155
										1.42947	-0.537365	1.02825	1.07574
										1.46641	-0.415956	1.0253	0.438775
										1.29373	-0.316037	1.38417	0.864932
										1.30387	-0.397022	1.10956	0.909604
										1.54904	-0.659154	1.20657	0.683006
										1.4133	-0.381187	1.00041	0.555965
										1.60376	-0.265507	1.00079	0.97809
										1.34351	-0.569913	1.16312	1.10883
										1.31411	-0.335628	0.901678	0.506557
										1.75919	-0.383606	0.992757	0.909299
										2.15035	-0.458041	1.05508	0.485064
										1.56021	-0.553472	1.26118	0.687076
										1.64647	-0.380299	1.09425	0.204526
										1.45637	-0.671326	1.07863	0.585248
										1.44207	-0.234555	1.15872	0.389838
										1.30565	-0.683717	1.15134	0.486048
										1.53332	-0.0882991	1.13957	0.788048
										1.44819	-0.769285	1.09131	0.833808
										1.23209	-0.0267485	1.25278	0.252688
												1.07025	0.451428
												1.18743	0.791114
												1.12218	0.809203
												1.10516	0.646721
												1.05523	0.51796
												1.20131	-0.0138204
												1.33342	0.554287
												1.12087	0.689718
												1.14423	0.695625
												1.07215	0.866497
												1.01147	0.600892
												1.31299	0.735346
												1.19144	0.0406188
												1.11602	0.11665
												1.23369	-0.222199
												1.20811	0.471941
												1.337	0.375032
												1.26651	0.101429
												1.25111	0.114347
												1.16378	0.12647
												1.14264	0.272193
												1.55451	0.369381
												1.20781	0.589295
												1.25223	0.311109
												1.11659	0.33644
												1.10007	0.620758
												1.42788	0.936924
												1.18573	0.135257
												1.10897	0.7007
												1.18269	0.196427
												1.21155	0.524169
												1.23944	0.136807
												1.38181	0.42649
												1.44826	0.591971
												1.34902	0.707988
												1.21922	0.699798
												1.17456	0.652274
												1.52301	0.559773
												1.08865	0.458878
												1.1196	0.618939
												1.3062	0.703459
												1.47119	0.926669
												1.43709	0.657516
												1.53297	1.09728
												1.34452	1.13618
												1.23478	0.355666
												1.71743	1.05066
												1.16426	0.799259
												1.394	0.637162
												1.23777	0.79437
												1.55319	1.24621
												1.45731	0.817477
												1.41964	0.654704
												1.18522	1.16918
												1.45493	0.40789
												1.23901	0.114379
												1.20941	0.603247
												1.14884	0.729887
												1.62447	0.505731
												1.12398	0.71439
												1.12225	-0.180359
												1.11095	0.828813
												1.32281	0.84796
												1.10247	-0.413771
												1.28053	0.609357
												1.19583	0.863246
												1.14554	1.05
												1.08248	1.06518
												1.12057	1.32893
												1.32985	-0.382799
												1.07714	-0.236201
												1.08464	0.977554
												1.1678	1.39604
												1.09459	1.20278
												1.4135	0.0531919
												1.10361	0.919615
												1.04767	0.879407
												1.03378	0.667547
												1.15329	0.338742
												1.14494	0.859114
												1.36173	0.573189
												1.13029	0.439945
												1.2936	0.211998
												1.10755	0.521577
												1.15276	0.162267
												1.40167	0.829124
												1.02185	0.360891
												1.06669	0.483826
												1.16832	0.311862
												1.25633	-0.312713
												1.17202	0.558577
												1.08536	-0.472854
												1.19426	0.118492
												1.11904	0.0164244
												1.17236	0.14993
												1.01179	0.0387735
												1.29391	0.216379
												1.15507	0.561701
												1.1423	-0.503964
												1.15042	-0.560223
												1.26198	0.770074
												1.171	0.636137
												1.33109	0.740559
												1.27218	0.905603
												1.1196	0.528998
												1.3556	0.468313
												1.11369	-0.269509
												0.984077	0.443297
												0.937986	0.47694
												1.01867	0.249006
												0.949958	-0.116638
												1.07028	0.206393
												0.950495	0.413446
												0.967002	0.140405
												0.948855	0.485168
												0.900374	0.970016
												1.41002	-0.251563
												0.986682	0.0865593
												0.929738	0.371102
												0.887187	0.796978
												0.955694	1.0393
												1.24401	0.0846833
												0.954857	0.449538
												0.854697	0.738533
												0.929846	0.511899
												1.01433	0.713709
												0.942539	0.442007
												1.1776	0.443323
												1.0146	0.48659
												0.91886	0.452089
												0.91443	0.545308
												0.965224	0.554208
												1.20139	0.925586
												0.873172	0.469928
												0.913249	0.790131
												1.03556	0.708095
												1.18084	0.0763634
												1.051	0.427033
												1.17594	0.221734
												1.08472	0.0551333
												1.02952	-0.424363
												1.20491	0.0781184
												1.03183	0.0132072
												1.26022	0.673711
												1.02624	1.1471
												1.12949	0.0227238
												1.07713	0.145994
												0.956516	0.259946
												0.973488	0.403452
												1.24166	0.0912845
												1.0108	0.322945
												1.03599	1.0513
												1.14047	0.946091
												0.974534	-0.521444
												0.964362	1.09818
												1.06939	-0.00753445
												1.03229	0.598224
												1.10012	0.0134823
												1.02844	0.328748
												1.06051	-0.0327383
												1.01382	-0.137637
												1.01377	0.165661
												1.21982	0.577724
												1.00368	0.440713
												1.01264	-0.0334244
												0.95383	0.469174
												0.933148	0.984594
												1.27443	0.406616
												1.03039	0.468169
												0.962595	0.495457
												0.938814	0.664051
												1.04531	0.986258
												1.01819	0.373229
												1.21515	0.8491
												1.0879	0.978841
												1.03867	0.816391
												0.9476	0.65914
												1.03017	0.925158
												1.22178	1.23564
												0.949737	0.627463
												0.986982	0.842677
												1.08708	0.583703
												1.12971	1.00804
												1.09241	0.637904
												1.10675	0.737917
												1.07414	0.798222
												1.09948	0.422581
												1.28912	0.896891
												0.952139	0.922699
												1.26419	0.511553
												1.10994	0.601795
												1.10617	0.901739
												1.12162	0.921836
												1.28097	0.783093
												0.971265	0.90325
												1.18047	0.474806
												1.09982	0.777644
												1.07473	0.816036
												1.13475	0.671068
												1.02644	0.760646
												0.987669	0.65557
												1.13413	0.309812
												1.2243	0.562415
												1.09568	0.0205096
												1.19359	0.0524147
												1.08783	-0.266648
												1.1057	0.0352908
												1.54913	0.172942
												1.09732	0.193412
												1.08048	0.18147
												1.01171	-0.0183383
												1.04444	0.784259
												1.37921	0.95197
												1.10717	0.0253254
												1.02241	0.697453
												1.08173	0.21928
												1.14989	0.767701
												1.20054	-0.196401
												1.26473	0.244212
												1.15924	0.348485
												1.27191	0.749667
												1.15857	0.734754
												1.14463	0.624063
												1.18591	0.540998
												1.02153	0.440663
												1.05515	0.49468
												1.15498	0.296395
												1.33593	0.780642
												1.10574	0.620651
												1.14144	0.931747
												1.1562	0.861112
												1.08219	0.340647
												1.43416	1.29439
												1.05054	1.10896
												1.27508	0.534124
												1.12561	0.607124
												1.19486	0.987393
												1.17071	0.851879
												1.26636	0.558194
												1.13604	1.04233
												1.24988	0.522313
												1.1847	0.213897
												1.14931	0.480173
												1.12153	0.544286
												1.06333	0.420766
												1.03324	0.830201
												1.1534	0.333429
												1.02575	0.532922
												1.06048	0.826395
												1.09062	0.686915
												1.0535	0.887425
												1.18048	-0.569552
												1.00446	-0.456554
												1.01573	0.624637
												1.02001	0.949293
												1.05791	1.28105
												1.33097	0.126997
												1.09828	0.633013
												0.93636	0.82355
												0.961112	0.695804
												1.07186	0.560523
												1.12335	0.557568
												1.19324	0.532171
												1.11153	0.742969
												1.27314	0.460968
												1.00145	0.548492
												1.12506	0.307559
												1.171	0.820721
												0.980328	0.296623
												1.03821	0.326877
												1.11104	0.207347
												1.18494	0.135855
												1.09286	0.657323
												1.09062	-0.515544
												1.12773	0.338568
												1.06146	-0.00291268
												1.15723	0.308413
												1.00602	-0.0193776
												1.1561	0.295119
												1.1178	0.808624
												1.14107	-0.344999
												1.08367	-0.577296
												1.03684	0.3884
												1.07856	0.580066
												1.19207	0.541445
												1.18339	0.589469
												1.09434	0.657292
												1.16307	0.600897
												1.03149	-0.242798
												1.03827	0.456351
												1.13011	-0.0937666
												1.12088	0.0462451
												1.16012	0.745378
												1.23242	0.839653
												1.61281	0.448573
												1.21381	0.0652212
												1.0461	0.225247
												1.17536	0.799098
												1.13869	1.15877
												1.58844	0.141917
												1.27402	0.263376
												1.03889	0.575497
												1.09962	0.664956
												1.20565	1.05493
												1.30564	0.248711
												1.56617	0.371887
												1.18297	0.492063
												1.0975	0.572186
												1.08651	0.508372
												1.21931	0.730558
												1.66327	1.06891
												1.04869	0.604536
												1.11246	0.689921
												1.3523	0.202894
												1.43253	0.25261
												1.31319	0.336764
												1.38048	0.294011
												1.24746	-0.00017956
												1.22794	0.27636
												1.50566	0.58297
												1.03255	0.695873
												1.41761	0.339581
												1.31945	0.611751
												1.4223	0.767794
												1.23919	0.466038
												1.30527	0.00144006
												1.20315	0.0427341
												1.52261	0.175084
												1.29968	0.645854
												1.28496	0.660016
												1.28431	0.706677
												1.12791	0.547627
												1.08522	0.880783
												1.04314	-0.191301
												1.00927	0.240159
												1.04917	0.739644
												1.32054	0.296443
												1.03325	0.0962521
												1.0573	-0.0615114
												1.0393	0.280104
												1.05748	0.572321
												1.33906	-0.159461
												1.10414	-0.226428
												0.961504	0.076612
												0.99058	0.0390068
												1.18199	0.695012
												1.07776	-0.189097
												1.26088	0.126903
												1.09169	0.195931
												1.08461	0.398828
												1.10094	0.184434
												1.0877	0.284811
												1.42683	0.983006
												0.923549	0.0684052
												1.01201	0.0841893
												1.1153	0.0461621
												1.31404	0.389706
												1.1232	0.289944
												1.27757	0.569673
												1.17783	0.296438
												1.03795	-0.0377223
												1.43325	0.861973
												0.9167	0.803223
												1.20804	0.0112664
												1.06815	-0.273333
												1.35602	0.890209
												1.41938	0.813759
												1.27751	0.172214
												0.991027	0.24227
												1.34752	0.446487
												1.16546	0.299833
												1.07898	-0.0477003
												1.10795	0.0223512
												1.08929	0.284114
												1.01971	0.583061
												1.03539	0.0648776
												1.00952	0.512173
												1.46244	0.789463
												1.02653	0.394625
												1.01384	-0.220919
												1.13613	0.299113
												1.04833	0.568278
												1.45168	0.233055
												1.05889	-0.311048
												0.994923	0.201218
												1.04367	0.439146
												1.14243	0.714473
												1.06764	-0.0216559
												1.35773	0.590343
												1.09832	0.442192
												1.17614	0.590942
												1.19076	0.416436
												1.11816	0.687212
												1.31176	0.88993
												0.936798	0.300146
												1.01922	0.592018
												1.0688	0.55563
												1.12725	1.00363
												1.04963	0.476283
												1.15428	1.14437
												1.12064	0.71226
												1.02945	-0.126722
												1.2857	0.800638
												1.03152	0.570308
												1.3203	0.300162
												1.13277	0.0750753
												1.53869	1.02963
												1.20253	0.822813
												1.27617	0.534696
												1.1347	0.456453
												1.33415	0.447845
												1.19018	0.447543
												1.21724	0.337767
												1.17664	0.0882123
												1.137	0.639992
												0.919245	0.348386
												0.96777	0.203533
												1.41111	0.469477
												0.99999	0.43282
												1.0421	-0.163347
												0.931853	-0.0659473
												0.978842	0.81764
												1.33067	0.489932
												1.06133	0.221076
												0.982491	0.226309
												1.03979	0.191413
												1.12821	0.826252
												1.062	-0.153573
												1.30365	0.417495
												1.08357	0.653343
												1.21482	0.789347
												1.0278	0.530577
												1.04602	0.705996
												1.35889	0.920867
												0.940644	0.670458
												1.01017	0.699848
												1.11445	0.376954
												1.16384	1.00241
												1.09142	0.854682
												1.10517	0.920862
												1.11685	0.996204
												1.02834	0.541197
												1.22436	1.17279
												1.02454	0.984832
												1.21044	0.707966
												1.04062	0.366772
												1.17019	1.01635
												1.11385	0.856907
												1.09731	0.770637
												1.03596	0.96784
												1.23149	0.543895
												1.12889	0.619938
												1.02185	0.591683
												1.03763	0.223981
												1.04755	0.820724
												0.975774	0.664155
												1.79741	0.971914
												1.12175	0.73475
												0.949853	0.575609
												1.2309	0.327307
												0.928082	0.946989
												1.91426	1.18716
												1.1813	0.521506
												0.880006	0.745029
												1.08146	0.670981
												1.19983	1.05164
												1.11245	0.582197
												1.61023	0.850098
												1.25232	1.0439
												1.11363	0.974774
												0.991069	0.845346
												1.07948	1.04106
												1.44722	0.802908
												0.937768	0.800309
												0.986112	0.953813
												1.19722	0.581361
												1.37362	1.13144
												1.25015	0.665404
												1.2614	1.05216
												1.17656	1.07539
												1.03502	1.26509
												1.68113	1.48008
												1.01003	1.39268
												1.72122	0.628143
												1.29074	0.971876
												1.2163	1.2318
												1.74071	1.15301
												1.76475	0.981105
												1.13052	1.11313
												1.9169	0.732797
												1.95672	0.7907
												1.14686	0.868249
												1.17056	0.913492
												1.14662	1.24086
												0.949467	0.955987
												1.23048	-0.151174
												1.18936	0.597787
												1.33257	0.901618
												1.27009	0.854972
												1.39235	-0.0670192
												1.71034	0.528458
												1.363	0.580292
												1.29335	0.543279
												1.54202	0.399614
												1.36652	0.34896
												1.9514	0.409802
												1.27713	0.450204
												2.3645	0.375482
												1.59733	0.421994
												1.43333	0.20237
												1.37604	0.799585
												1.13367	0.386175
												1.15827	0.589247
												1.38844	0.308279
												1.67142	-0.0289606
												1.69726	0.304402
												1.14979	-0.0732345
												1.34272	0.30183
												1.18934	-0.18173
												1.58351	-0.0823219
												1.05436	-0.226996
												1.25091	0.108146
												1.39166	0.77221
												1.29156	-0.548442
												1.16716	-0.402224
												1.63963	0.393317
												1.62122	0.649339
												1.47298	0.457469
												1.53599	0.504709
												1.29096	0.777806
												1.41976	0.652852
												1.2273	-0.604704
												1.16994	0.737255
												1.03573	0.464783
												1.01754	0.651936
												1.07219	0.816144
												1.25857	-0.107455
												0.970507	0.25734
												0.976626	0.611426
												0.952287	0.427578
												1.0608	0.543057
												0.994788	-0.0153697
												1.3404	0.335407
												1.02876	0.578436
[truncated: 797 more rows]
